# Supplementary material for: Whole-genome resequencing reveals molecular imprints of anthropogenic and natural selection in wild and domesticated sheep
Source: PubMed Central journal article supplement — Zool Res. 2022 Sep 18;43(5):695–705. doi: 10.24272/j.issn.2095-8137.2022.124 (PMC9486524; doi:10.24272/j.issn.2095-8137.2022.124), 2022-09-18
Supplement: zr-43-5-695-S1.pdf [file zr-43-5-695-S1.pdf]

## Supplementary Materials

**Supplementary Figure S1** Genotyping of ovine *IFI44* c. 54413058 C>G SNP with KASPar technology.

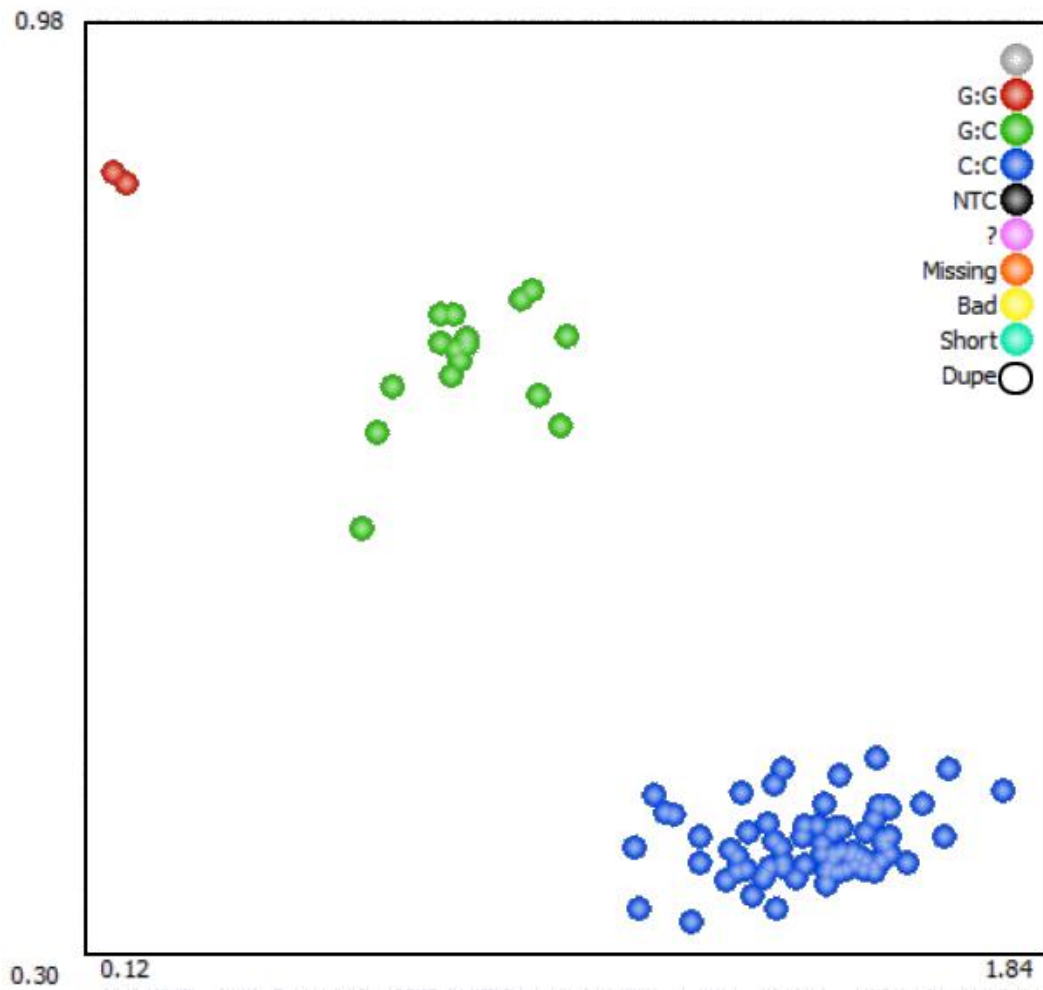

**Supplementary Table S1** Overview of sample information and sequencing statistics.

| Breed            | Sample ID          | Clean Reads (bp) | Clean Bases (bp) | Mapped Bases (bp) | Duplication Rate (%) | Clean Q30 Bases Rate (%) | Mapping Rate (%) | Uniq Rate (%) | Mean Depth | Coverage Rate (%) (>=1X) |
|------------------|--------------------|------------------|------------------|-------------------|----------------------|--------------------------|------------------|---------------|------------|--------------------------|
| Australian white | Australian white1  | 170,843,842      | 25,626,576,300   | 25,088,588,783    | 23.55                | 91.89                    | 97.9             | 91.8          | 9.69       | 96.87                    |
|                  | Australian white2  | 167,784,918      | 25,167,737,700   | 24,643,604,271    | 24.82                | 92.4                     | 97.92            | 91.88         | 9.52       | 96.79                    |
|                  | Australian white3  | 148,357,830      | 22,253,674,500   | 21,811,775,405    | 21.45                | 93.53                    | 98.01            | 92.1          | 8.43       | 96.52                    |
|                  | Australian white4  | 161,541,914      | 24,231,287,100   | 23,762,659,613    | 23.17                | 93.67                    | 98.07            | 91.73         | 9.18       | 96.71                    |
|                  | Australian white5  | 189,630,354      | 28,444,553,100   | 27,874,284,808    | 24.78                | 92.61                    | 98               | 92            | 10.77      | 97.24                    |
|                  | Australian white6  | 166,080,390      | 24,912,058,500   | 24,457,755,395    | 24.16                | 92.96                    | 98.18            | 92            | 9.45       | 96.98                    |
|                  | Australian white7  | 157,996,064      | 23,699,409,600   | 23,250,434,171    | 23.66                | 92.47                    | 98.11            | 91.88         | 8.98       | 96.84                    |
|                  | Australian white8  | 160,178,196      | 24,026,729,400   | 23,574,539,258    | 23.47                | 92.61                    | 98.12            | 91.86         | 9.11       | 96.89                    |
|                  | Australian white9  | 141,141,420      | 21,171,213,000   | 20,756,441,040    | 24.68                | 92.42                    | 98.04            | 91.71         | 8.02       | 96.23                    |
|                  | Australian white10 | 172,400,354      | 25,860,053,100   | 25,347,340,908    | 25.12                | 92.49                    | 98.02            | 91.97         | 9.79       | 97.12                    |
| Black suffolk    | Black suffolk1     | 183,963,938      | 27,594,590,700   | 27,006,495,365    | 27.14                | 92.87                    | 97.87            | 91.85         | 10.43      | 96.98                    |
|                  | Black suffolk2     | 188,745,728      | 28,311,859,200   | 27,720,003,740    | 28.45                | 92.99                    | 97.91            | 91.94         | 10.71      | 97.03                    |
|                  | Black suffolk3     | 224,806,694      | 33,721,004,100   | 32,994,112,402    | 29.9                 | 92.59                    | 97.84            | 91.59         | 12.75      | 97.37                    |
|                  | Black suffolk4     | 173,790,860      | 26,068,629,000   | 25,381,767,722    | 27.13                | 92.63                    | 97.37            | 91.44         | 9.81       | 96.74                    |
|                  | Black suffolk5     | 198,792,578      | 29,818,886,700   | 29,195,173,065    | 25.08                | 92.7                     | 97.91            | 91.58         | 11.28      | 97.3                     |
|                  | Black suffolk6     | 174,061,254      | 26,109,188,100   | 25,590,276,957    | 24.85                | 92.61                    | 98.01            | 92.08         | 9.89       | 97.2                     |
|                  | Black suffolk7     | 169,695,926      | 25,454,388,900   | 24,964,050,259    | 23.96                | 92.36                    | 98.07            | 92.09         | 9.65       | 97.14                    |
|                  | Black suffolk8     | 203,506,608      | 30,525,991,200   | 29,921,355,419    | 25.61                | 92.54                    | 98.02            | 91.76         | 11.56      | 97.42                    |
|                  | Black suffolk9     | 172,753,056      | 25,912,958,400   | 25,416,559,867    | 23.79                | 92.52                    | 98.08            | 92.01         | 9.82       | 97.2                     |
|                  | Black suffolk10    | 213,173,416      | 31,976,012,400   | 31,355,323,480    | 24.73                | 92.73                    | 98.06            | 92.15         | 12.11      | 97.56                    |
| Dorper           | Dorper1            | 175,399,374      | 26,309,906,100   | 25,795,577,070    | 22.04                | 93.17                    | 98.05            | 92.02         | 9.97       | 97.05                    |
|                  | Dorper2            | 148,801,556      | 22,320,233,400   | 21,861,945,791    | 21.37                | 93.62                    | 97.95            | 91.6          | 8.45       | 96.27                    |
|                  | Dorper3            | 189,462,300      | 28,419,345,000   | 24,612,029,099    | 26.68                | 92.73                    | 86.6             | 91.89         | 9.51       | 96.74                    |

|                              |                               |             |                |                |       |       |       |       |       |       |
|------------------------------|-------------------------------|-------------|----------------|----------------|-------|-------|-------|-------|-------|-------|
|                              | Dorper4                       | 146,634,164 | 21,995,124,600 | 16,647,941,754 | 26.06 | 92.31 | 75.69 | 91.31 | 6.43  | 94.23 |
|                              | Dorper5                       | 175,354,424 | 26,303,163,600 | 25,748,029,603 | 25.98 | 92.39 | 97.89 | 92.13 | 9.95  | 96.95 |
|                              | Dorper6                       | 168,686,112 | 25,302,916,800 | 24,822,383,758 | 25.36 | 92.62 | 98.1  | 91.86 | 9.59  | 96.96 |
|                              | Dorper7                       | 157,307,748 | 23,596,162,200 | 23,162,603,842 | 26.28 | 92.59 | 98.16 | 92.09 | 8.95  | 96.8  |
|                              | Dorper8                       | 184,296,488 | 27,644,473,200 | 27,145,028,506 | 26.81 | 92.73 | 98.19 | 92.18 | 10.49 | 97.23 |
|                              | Dorper9                       | 158,289,944 | 23,743,491,600 | 23,266,034,643 | 26.8  | 92.45 | 97.99 | 91.71 | 8.99  | 96.75 |
|                              | Dorper10                      | 141,347,354 | 21,202,103,100 | 20,808,168,581 | 25.23 | 91.85 | 98.14 | 92.01 | 8.04  | 96.46 |
|                              | East friensian milk<br>sheep1 | 199,290,496 | 29,893,574,400 | 26,499,770,923 | 25.03 | 92.62 | 88.65 | 92.16 | 10.24 | 97.2  |
|                              | East friensian milk<br>sheep2 | 219,231,118 | 32,884,667,700 | 31,052,493,174 | 25.73 | 93.05 | 94.43 | 92.23 | 12    | 97.42 |
|                              | East friensian milk<br>sheep3 | 213,763,206 | 32,064,480,900 | 31,365,250,611 | 25.86 | 92.7  | 97.82 | 91.68 | 12.12 | 97.36 |
|                              | East friensian milk<br>sheep4 | 180,719,156 | 27,107,873,400 | 26,550,780,191 | 24.32 | 92.7  | 97.94 | 92.08 | 10.26 | 97.13 |
| East friensian<br>milk sheep | East friensian milk<br>sheep5 | 144,850,188 | 21,727,528,200 | 21,274,962,993 | 24.54 | 92.7  | 97.92 | 91.59 | 8.22  | 96.05 |
|                              | East friensian milk<br>sheep6 | 195,915,076 | 29,387,261,400 | 28,833,003,158 | 24.62 | 92.5  | 98.11 | 92.6  | 11.14 | 97.52 |
|                              | East friensian milk<br>sheep7 | 169,093,576 | 25,364,036,400 | 24,867,091,971 | 24.84 | 92.64 | 98.04 | 91.77 | 9.61  | 97.06 |
|                              | East friensian milk<br>sheep8 | 167,405,574 | 25,110,836,100 | 24,628,815,296 | 25.39 | 92.55 | 98.08 | 91.8  | 9.52  | 96.98 |
|                              | East friensian milk<br>sheep9 | 177,587,610 | 26,638,141,500 | 26,095,632,074 | 25.59 | 92.61 | 97.96 | 91.8  | 10.08 | 97.13 |
|                              | East friensian milk           | 183,739,602 | 27,560,940,300 | 26,964,640,897 | 25.32 | 92.63 | 97.84 | 91.7  | 10.42 | 97.25 |

|                  |                    |             |                |                |       |       |       |       |       |       |
|------------------|--------------------|-------------|----------------|----------------|-------|-------|-------|-------|-------|-------|
|                  | sheep10            |             |                |                |       |       |       |       |       |       |
|                  | SA mutton merino1  | 182,223,690 | 27,333,553,500 | 26,265,258,696 | 26.11 | 92.92 | 96.09 | 89.04 | 10.15 | 94.81 |
|                  | SA mutton merino2  | 201,863,290 | 30,279,493,500 | 29,697,170,384 | 24.21 | 93.56 | 98.08 | 92.3  | 11.47 | 97.4  |
|                  | SA mutton merino3  | 184,045,326 | 27,606,798,900 | 27,068,223,304 | 24.19 | 93.35 | 98.05 | 92.14 | 10.46 | 97.13 |
|                  | SA mutton merino4  | 152,043,786 | 22,806,567,900 | 22,353,779,824 | 22.72 | 93.47 | 98.01 | 92.14 | 8.64  | 96.62 |
|                  | SA mutton merino5  | 184,612,594 | 27,691,889,100 | 27,124,925,503 | 24.18 | 93.21 | 97.95 | 91.98 | 10.48 | 97.14 |
| SA mutton merino | SA mutton merino6  | 145,010,808 | 21,751,621,200 | 21,342,622,299 | 22.25 | 93.08 | 98.12 | 91.98 | 8.25  | 96.66 |
|                  | SA mutton merino7  | 160,777,276 | 24,116,591,400 | 23,683,214,983 | 22.97 | 93.41 | 98.2  | 92.24 | 9.15  | 96.95 |
|                  | SA mutton merino8  | 218,093,632 | 32,714,044,800 | 32,079,163,887 | 28.89 | 92.7  | 98.06 | 92.03 | 12.39 | 97.51 |
|                  | SA mutton merino9  | 218,694,608 | 32,804,191,200 | 31,791,029,849 | 28.1  | 92.57 | 96.91 | 92.07 | 12.28 | 97.48 |
|                  | SA mutton merino10 | 187,654,078 | 28,148,111,700 | 27,583,183,299 | 26.72 | 92.5  | 97.99 | 91.94 | 10.66 | 97.28 |
|                  | Texel1             | 167,130,040 | 25,069,506,000 | 24,576,603,806 | 24.37 | 93.43 | 98.03 | 91.26 | 9.5   | 96.82 |
|                  | Texel2             | 177,846,500 | 26,676,975,000 | 26,123,346,781 | 25.42 | 93.65 | 97.92 | 91.16 | 10.09 | 96.92 |
|                  | Texel3             | 159,450,640 | 23,917,596,000 | 23,428,160,781 | 23.79 | 93.7  | 97.95 | 91.32 | 9.05  | 96.66 |
|                  | Texel4             | 152,728,018 | 22,909,202,700 | 22,371,670,143 | 25.14 | 93.33 | 97.65 | 90.53 | 8.64  | 96.1  |
| Texel            | Texel5             | 168,775,980 | 25,316,397,000 | 23,131,910,284 | 26.86 | 92.55 | 91.37 | 90.77 | 8.94  | 96.07 |
|                  | Texel6             | 178,317,864 | 26,747,679,600 | 26,205,402,178 | 28.03 | 92.84 | 97.97 | 91.34 | 10.12 | 96.94 |
|                  | Texel7             | 189,422,096 | 28,413,314,400 | 27,827,516,946 | 27.57 | 92.28 | 97.94 | 91.21 | 10.75 | 97.16 |
|                  | Texel8             | 192,492,344 | 28,873,851,600 | 28,313,698,690 | 27.12 | 92.58 | 98.06 | 91.27 | 10.94 | 97.27 |
|                  | Texel9             | 203,324,162 | 30,498,624,300 | 29,935,990,901 | 25.92 | 93.67 | 98.16 | 91.46 | 11.57 | 97.4  |
|                  | Texel10            | 190,542,876 | 28,581,431,400 | 28,038,450,420 | 25.11 | 93.74 | 98.1  | 91.33 | 10.83 | 97.07 |
|                  | Altay sheep1       | 116,347,000 | 17,452,050,000 | 17,001,957,946 | 23.72 | 93.08 | 97.42 | 90.34 | 6.57  | 93.69 |
| Altay sheep      | Altay sheep2       | 143,254,582 | 21,488,187,300 | 20,704,029,414 | 25.52 | 92.67 | 96.35 | 88.49 | 8     | 94.47 |
|                  | Altay sheep3       | 138,503,136 | 20,775,470,400 | 20,250,938,726 | 27.5  | 92.73 | 97.48 | 89.39 | 7.82  | 94.47 |
|                  | Altay sheep4       | 136,219,934 | 20,432,990,100 | 19,908,945,736 | 27.27 | 92.85 | 97.44 | 89.49 | 7.69  | 94.14 |

|                    |                          |             |                |                |       |       |       |       |       |       |
|--------------------|--------------------------|-------------|----------------|----------------|-------|-------|-------|-------|-------|-------|
|                    | Altay sheep5             | 181,272,490 | 27,190,873,500 | 26,492,721,793 | 27.1  | 92.99 | 97.43 | 90.98 | 10.24 | 96.81 |
|                    | Altay sheep6             | 167,917,268 | 25,187,590,200 | 24,614,129,374 | 26.96 | 92.68 | 97.72 | 90.72 | 9.51  | 96.58 |
|                    | Altay sheep7             | 159,395,222 | 23,909,283,300 | 23,379,844,614 | 25.57 | 92.95 | 97.79 | 90.92 | 9.03  | 96.56 |
|                    | Altay sheep8             | 185,938,110 | 27,890,716,500 | 27,260,508,999 | 25.98 | 92.94 | 97.74 | 90.9  | 10.53 | 97.02 |
|                    | Altay sheep9             | 204,932,778 | 30,739,916,700 | 30,080,331,099 | 27.44 | 93.37 | 97.85 | 90.34 | 11.62 | 97.18 |
|                    | Altay sheep10            | 156,789,190 | 23,518,378,500 | 22,994,007,035 | 28.08 | 93.05 | 97.77 | 90.3  | 8.88  | 96.12 |
|                    | Large-tailed Han sheep1  | 213,957,826 | 32,093,673,900 | 31,386,958,700 | 28.55 | 92.6  | 97.8  | 91.06 | 12.13 | 97.22 |
|                    | Large-tailed Han sheep2  | 181,924,490 | 27,288,673,500 | 26,654,541,494 | 26.75 | 92.54 | 97.68 | 90.99 | 10.3  | 96.31 |
|                    | Large-tailed Han sheep3  | 141,103,772 | 21,165,565,800 | 20,733,806,945 | 22.61 | 93.56 | 97.96 | 91.7  | 8.01  | 96.03 |
|                    | Large-tailed Han sheep4  | 147,524,302 | 22,128,645,300 | 21,680,810,563 | 24.7  | 93.29 | 97.98 | 91.79 | 8.38  | 96.31 |
| Lanzhou            | Large-tailed Han sheep5  | 150,539,826 | 22,580,973,900 | 21,792,868,825 | 21.88 | 93.29 | 96.51 | 91.23 | 8.42  | 95.69 |
| Large-tailed sheep | Large-tailed Han sheep6  | 139,450,274 | 20,917,541,100 | 20,444,943,456 | 22.14 | 93.21 | 97.74 | 91.33 | 7.9   | 96.14 |
|                    | Large-tailed Han sheep7  | 151,910,370 | 22,786,555,500 | 22,357,606,327 | 22.94 | 93.56 | 98.12 | 91.25 | 8.64  | 96.58 |
|                    | Large-tailed Han sheep8  | 132,241,788 | 19,836,268,200 | 19,457,518,106 | 20.56 | 93.28 | 98.09 | 91.64 | 7.52  | 96.01 |
|                    | Large-tailed Han sheep9  | 129,884,244 | 19,482,636,600 | 19,101,440,919 | 21.16 | 93.7  | 98.04 | 91.31 | 7.38  | 95.62 |
|                    | Large-tailed Han sheep10 | 157,281,466 | 23,592,219,900 | 23,064,959,033 | 23.49 | 93.44 | 97.77 | 91.45 | 8.91  | 96.69 |

|              |                      |             |                |                |       |       |       |       |       |       |
|--------------|----------------------|-------------|----------------|----------------|-------|-------|-------|-------|-------|-------|
|              | Lanzhou              | 163,113,178 | 24,466,976,700 | 23,968,138,579 | 25.66 | 92.19 | 97.96 | 91.51 | 9.26  | 96.68 |
|              | Large-tailed sheep1  |             |                |                |       |       |       |       |       |       |
|              | Lanzhou              | 159,352,520 | 23,902,878,000 | 23,413,799,704 | 26.36 | 92.61 | 97.95 | 91.67 | 9.05  | 96.49 |
|              | Large-tailed sheep2  |             |                |                |       |       |       |       |       |       |
|              | Lanzhou              | 148,928,386 | 22,339,257,900 | 21,845,880,545 | 26.19 | 92.17 | 97.79 | 90.82 | 8.44  | 95.59 |
|              | Large-tailed sheep3  |             |                |                |       |       |       |       |       |       |
|              | Lanzhou              | 168,357,324 | 25,253,598,600 | 24,708,217,220 | 26.59 | 92.34 | 97.84 | 91.46 | 9.55  | 96.75 |
|              | Large-tailed sheep4  |             |                |                |       |       |       |       |       |       |
| Lanzhou      | Lanzhou              | 170,179,522 | 25,526,928,300 | 24,861,367,986 | 26.1  | 92.56 | 97.39 | 91.18 | 9.6   | 96.53 |
| Large-tailed | Large-tailed sheep5  |             |                |                |       |       |       |       |       |       |
| sheep        | Lanzhou              | 199,360,210 | 29,904,031,500 | 29,338,269,540 | 26.99 | 92.54 | 98.11 | 92.06 | 11.34 | 97.43 |
|              | Large-tailed sheep6  |             |                |                |       |       |       |       |       |       |
|              | Lanzhou              | 149,534,110 | 22,430,116,500 | 22,029,966,437 | 25.92 | 92.61 | 98.22 | 91.17 | 8.51  | 96.48 |
|              | Large-tailed sheep7  |             |                |                |       |       |       |       |       |       |
|              | Lanzhou              | 191,879,902 | 28,781,985,300 | 28,255,689,289 | 28.16 | 92.39 | 98.17 | 91.8  | 10.92 | 97.22 |
|              | Large-tailed sheep8  |             |                |                |       |       |       |       |       |       |
|              | Lanzhou              | 171,114,548 | 25,667,182,200 | 25,186,282,640 | 27.61 | 92.87 | 98.13 | 91.53 | 9.73  | 96.86 |
|              | Large-tailed sheep9  |             |                |                |       |       |       |       |       |       |
|              | Lanzhou              | 163,412,116 | 24,511,817,400 | 24,045,492,611 | 26.13 | 91.95 | 98.1  | 91.67 | 9.29  | 96.89 |
|              | Large-tailed sheep10 |             |                |                |       |       |       |       |       |       |
|              | Mongolian sheep1     | 147,980,646 | 22,197,096,900 | 21,697,854,748 | 21.83 | 93.1  | 97.75 | 91.47 | 8.38  | 96.24 |
|              | Mongolian sheep2     | 170,308,256 | 25,546,238,400 | 25,022,790,538 | 20.45 | 93.58 | 97.95 | 92.51 | 9.67  | 97.02 |
| Mongolian    | Mongolian sheep3     | 152,357,538 | 22,853,630,700 | 22,341,573,260 | 22.45 | 92.8  | 97.76 | 91.54 | 8.63  | 96.37 |
| sheep        | Mongolian sheep4     | 135,750,848 | 20,362,627,200 | 19,892,886,850 | 22.29 | 93.27 | 97.69 | 91.72 | 7.69  | 95.69 |
|              | Mongolian sheep5     | 135,465,506 | 20,319,825,900 | 19,864,085,995 | 23.76 | 93.33 | 97.76 | 91.26 | 7.67  | 95.59 |

|                   |             |                |                |       |       |       |       |      |       |
|-------------------|-------------|----------------|----------------|-------|-------|-------|-------|------|-------|
| Mongolian sheep6  | 149,229,398 | 22,384,409,700 | 21,909,655,014 | 23.01 | 93.11 | 97.88 | 91.71 | 8.47 | 96.43 |
| Mongolian sheep7  | 173,867,568 | 26,080,135,200 | 25,535,695,553 | 24.22 | 91.56 | 97.91 | 92.23 | 9.87 | 97.23 |
| Mongolian sheep8  | 141,539,512 | 21,230,926,800 | 20,776,160,508 | 23.4  | 92.02 | 97.86 | 92.02 | 8.03 | 96.17 |
| Mongolian sheep9  | 158,899,756 | 23,834,963,400 | 23,360,050,335 | 23.12 | 92.94 | 98.01 | 92.32 | 9.03 | 97.01 |
| Mongolian sheep10 | 132,518,432 | 19,877,764,800 | 19,498,051,283 | 22.92 | 93.41 | 98.09 | 92.64 | 7.53 | 96.15 |

**Supplementary Table S2** Overview of publicly available whole-genome sequencing data used for analyses.

| Breed           | Biosample    | Accession number | Bases | Size  | Sex    |
|-----------------|--------------|------------------|-------|-------|--------|
| Asian Mouflon1  | SAMEA2012638 | ERR157930        | 40.5G | 25.9G | male   |
| Asian Mouflon2  | SAMEA2012641 | ERR157931        | 40.1G | 24.9G | male   |
| Asian Mouflon3  | SAMEA2012642 | ERR157932        | 39.5G | 24.9G | male   |
| Asian Mouflon4  | SAMEA2012643 | ERR157935        | 40G   | 25.3G | male   |
| Asian Mouflon5  | SAMEA2012637 | ERR157938        | 42.1G | 27.6G | male   |
| Asian Mouflon6  | SAMEA2012639 | ERR157939        | 37.9G | 24.2G | male   |
| Asian Mouflon7  | SAMEA2012640 | ERR157942        | 40.1G | 25.1G | male   |
| Asian Mouflon8  | SAMEA1967031 | ERR157944        | 40G   | 25.1G | male   |
| Asian Mouflon9  | SAMEA2065604 | ERR315509        | 37.7G | 25.4G | female |
| Asian Mouflon10 | SAMEA1972234 | ERR332573        | 44.2G | 28.9G | male   |
| Asian Mouflon11 | SAMEA2065601 | ERR332575        | 42.2G | 27G   | male   |
| Asian Mouflon12 | SAMEA2065603 | ERR332582        | 44.3G | 28.6G | male   |
| Asian Mouflon13 | SAMEA2065602 | ERR332587        | 38.5G | 23.5G | female |
| Asian Mouflon14 | SAMEA2065600 | ERR332589        | 39.8G | 24.6G | male   |
| Asian Mouflon15 | SAMEA1964491 | ERR340346        | 37.7G | 25.1G | male   |
| Asian Mouflon16 | SAMEA2395411 | ERR466544        | 36.9G | 23.7G | male   |
| Asian Mouflon17 | SAMEA2395410 | ERR466546        | 38.7G | 25.6G | female |

|            |              |           |       |       |        |
|------------|--------------|-----------|-------|-------|--------|
| Sardi1     | SAMEA2012858 | ERR299293 | 40G   | 27.4G | female |
| Sardi2     | SAMEA2012337 | ERR332591 | 37.1G | 24.5G | female |
| Sardi3     | SAMEA2012244 | ERR318906 | 39.5G | 24.6G | female |
| Sardi4     | SAMEA1973547 | ERR299458 | 37.8G | 23.4G | female |
| Sardi5     | SAMEA2012249 | ERR299454 | 34.2G | 21.1G | female |
| Sardi6     | SAMEA2012242 | ERR318902 | 37.7G | 23.2G | male   |
| D'man1     | SAMEA2012440 | ERR318900 | 38.1G | 23.6G | male   |
| D'man2     | SAMEA2012525 | ERR277069 | 44.6G | 29.1G | male   |
| D'man3     | SAMEA2012334 | ERR318899 | 39G   | 23.9G | male   |
| D'man4     | SAMEA2012526 | ERR318760 | 37.6G | 25G   | male   |
| D'man5     | SAMEA2012324 | ERR283428 | 40.4G | 25.3G | male   |
| D'man6     | SAMEA2012435 | ERR318916 | 36.1G | 22G   | female |
| D'man7     | SAMEA2012247 | ERR283423 | 43.3G | 27.5G | female |
| D'man8     | SAMEA2012528 | ERR318762 | 33.5G | 20.4G | female |
| D'man9     | SAMEA2012233 | ERR299278 | 33.4G | 20.4G | female |
| Beni Guil1 | SAMEA2012918 | ERR318758 | 37G   | 25.7G | female |
| Beni Guil2 | SAMEA2012855 | ERR315499 | 30.3G | 18G   | female |
| Beni Guil3 | SAMEA2012853 | ERR299462 | 31.7G | 19.5G | female |
| Beni Guil4 | SAMEA2012114 | ERR299276 | 33.4G | 20.9G | male   |
| Beni Guil5 | SAMEA2012162 | ERR299288 | 45.7G | 30.4G | female |
| Beni Guil6 | SAMEA2012859 | ERR299281 | 38.3G | 24.5G | female |
| Timahdite1 | SAMEA2012593 | ERR332590 | 35G   | 21.7G | female |
| Timahdite2 | SAMEA2012535 | ERR319042 | 36.8G | 24.2G | female |
| Timahdite3 | SAMEA2012605 | ERR319037 | 36.7G | 23.8G | female |
| Timahdite4 | SAMEA2012844 | ERR319038 | 38G   | 24.8G | female |
| Timahdite5 | SAMEA2042062 | ERR345984 | 33.4G | 20.6G | female |



|                    |              |            |       |       |        |
|--------------------|--------------|------------|-------|-------|--------|
| Timahdite6         | SAMEA2012537 | ERR234303  | 45.2G | 30.7G | male   |
| Timahdite7         | SAMEA2012606 | ERR318777  | 34.2G | 21G   | male   |
| Ouled Djellal1     | SAMEA2012913 | ERR319040  | 39G   | 27.1G | male   |
| Ouled Djellal2     | SAMEA2012117 | ERR318896  | 32.1G | 19.4G | female |
| Ouled Djellal3     | SAMEA2012919 | ERR318770  | 36.5G | 25.2G | female |
| Ouled Djellal4     | SAMEA2012925 | ERR299284  | 38.8G | 24.6G | female |
| Ouled Djellal5     | SAMEA2012920 | ERR299280  | 31.1G | 18.8G | female |
| Ouled Djellal6     | SAMEA2012923 | ERR299275  | 39.8G | 26.5G | female |
| Bayinbuluke sheep1 | SAMN04306062 | SRR2980596 | 9.8G  | 3.5G  | female |
| Bayinbuluke sheep2 | SAMN04306061 | SRR2976723 | 13.1G | 4.7G  | female |
| Bayinbuluke sheep3 | SAMN04306059 | SRR2976711 | 15.4G | 5.4G  | female |
| Bayinbuluke sheep4 | SAMN04306058 | SRR2976708 | 19.1G | 6.6G  | female |
| Bayinbuluke sheep5 | SAMN04306057 | SRR2976545 | 18.5G | 8.7G  | male   |
| Bayinbuluke sheep6 | SAMN04306056 | SRR2976544 | 17.6G | 8.2G  | male   |
| Bayinbuluke sheep7 | SAMN04306055 | SRR2976542 | 14.8G | 5.3G  | male   |
| Bayinbuluke sheep8 | SAMN04306054 | SRR2976539 | 11.3G | 4G    | male   |
| Bayinbuluke sheep9 | SAMN04306053 | SRR2976535 | 11.9G | 4.1G  | male   |
| Qira Black sheep1  | SAMN04306072 | SRR2992575 | 19.7G | 9.7G  | female |
| Qira Black sheep2  | SAMN04306071 | SRR2992573 | 16.2G | 7.9G  | female |
| Qira Black sheep3  | SAMN04306070 | SRR2984620 | 8.5G  | 2.8G  | female |
| Qira Black sheep4  | SAMN04306069 | SRR2984619 | 11.5G | 3.9G  | female |
| Qira Black sheep5  | SAMN04306068 | SRR2984616 | 18.7G | 6.4G  | female |
| Qira Black sheep6  | SAMN04306067 | SRR2982588 | 17.5G | 5.9G  | male   |
| Qira Black sheep7  | SAMN04306066 | SRR2982564 | 18.9G | 6.4G  | male   |
| Qira Black sheep8  | SAMN04306065 | SRR2982559 | 18.7G | 6.4G  | male   |
| Qira Black sheep9  | SAMN04306064 | SRR2980624 | 18.8G | 6.5G  | male   |

|                          |              |            |       |       |        |
|--------------------------|--------------|------------|-------|-------|--------|
| Qira Black sheep10       | SAMN04306063 | SRR2980606 | 9.9G  | 3.4G  | male   |
| Tibetan sheep1 (Valley)  | SAMN04306082 | SRR3023068 | 10.5G | 3.7G  | female |
| Tibetan sheep2 (Valley)  | SAMN04306081 | SRR3022928 | 16.3G | 5.7G  | female |
| Tibetan sheep3 (Valley)  | SAMN04306080 | SRR2997425 | 17.4G | 6.1G  | female |
| Tibetan sheep4 (Valley)  | SAMN04306079 | SRR2997424 | 20.1G | 6.9G  | female |
| Tibetan sheep5 (Valley)  | SAMN04306078 | SRR2997390 | 18.8G | 6.5G  | female |
| Tibetan sheep6 (Valley)  | SAMN04306077 | SRR2997388 | 17G   | 5.8G  | male   |
| Tibetan sheep7 (Valley)  | SAMN04306076 | SRR2997142 | 16.9G | 5.9G  | male   |
| Tibetan sheep8 (Valley)  | SAMN04306075 | SRR2992820 | 9.4G  | 3.2G  | male   |
| Tibetan sheep9 (Valley)  | SAMN04306074 | SRR2992761 | 18.4G | 6.2G  | male   |
| Tibetan sheep10 (Valley) | SAMN04306073 | SRR2992628 | 17.5G | 5.9G  | male   |
| Tibetan sheep11 (Valley) | SAMN06161578 | SRR5149616 | 31G   | 12.9G | female |
| Tibetan sheep12 (Valley) | SAMN03565385 | SRR1999380 | 36.1G | 21.3G | female |
| Tibetan sheep13 (Valley) | SAMN03565384 | SRR1999378 | 29.5G | 18.1G | female |
| Tibetan sheep14 (Valley) | SAMN03565379 | SRR1999369 | 37.2G | 23G   | female |
| Tibetan sheep15 (Valley) | SAMN03565378 | SRR1999366 | 31.1G | 19.1G | female |
| Tibetan sheep16 (Valley) | SAMN03565377 | SRR1999363 | 34.7G | 21.2G | female |
| Tibetan sheep1 (Oula)    | SAMN04306102 | SRR3055051 | 11.2G | 3.8G  | female |
| Tibetan sheep2 (Oula)    | SAMN04306101 | SRR3055050 | 17.8G | 6.1G  | female |
| Tibetan sheep3 (Oula)    | SAMN04306100 | SRR3055048 | 13.6G | 4.6G  | female |
| Tibetan sheep4 (Oula)    | SAMN04306099 | SRR3054976 | 17.8G | 6.1G  | female |
| Tibetan sheep5 (Oula)    | SAMN04306098 | SRR3054905 | 18.4G | 8.7G  | female |
| Tibetan sheep6 (Oula)    | SAMN04306097 | SRR3054904 | 17.3G | 6G    | male   |
| Tibetan sheep7 (Oula)    | SAMN04306096 | SRR3043360 | 13.5G | 4.7G  | male   |
| Tibetan sheep8 (Oula)    | SAMN04306095 | SRR3043358 | 15.9G | 5.6G  | male   |
| Tibetan sheep9 (Oula)    | SAMN04306093 | SRR3043353 | 14.3G | 5.2G  | male   |

|                           |              |            |       |       |        |
|---------------------------|--------------|------------|-------|-------|--------|
| Tibetan sheep1 (Prairie)  | SAMN04306139 | SRR3471450 | 16.8G | 6.1G  | female |
| Tibetan sheep2 (Prairie)  | SAMN04306141 | SRR3471455 | 16.0G | 5.9G  | female |
| Tibetan sheep3 (Prairie)  | SAMN04306140 | SRR3471451 | 10.7G | 4.1G  | female |
| Tibetan sheep4 (Prairie)  | SAMN04306138 | SRR3471448 | 20.2G | 6.9G  | female |
| Tibetan sheep5 (Prairie)  | SAMN04306137 | SRR3471444 | 17.3G | 6G    | female |
| Tibetan sheep6 (Prairie)  | SAMN04306136 | SRR3193955 | 15.5G | 5.5G  | male   |
| Tibetan sheep7 (Prairie)  | SAMN04306135 | SRR3193949 | 7.1G  | 2.4G  | male   |
| Tibetan sheep8 (Prairie)  | SAMN04306134 | SRR3193947 | 19G   | 6.4G  | male   |
| Tibetan sheep9 (Prairie)  | SAMN04306133 | SRR3193937 | 16.1G | 5.5G  | male   |
| Tibetan sheep10 (Prairie) | SAMN04306132 | SRR3193935 | 18.7G | 6.3G  | male   |
| Tibetan sheep11 (Prairie) | SAMN03565383 | SRR1999376 | 30.6G | 18.8G | male   |
| Tibetan sheep12 (Prairie) | SAMN03565382 | SRR1999375 | 44.6G | 27.4G | male   |
| Tibetan sheep13 (Prairie) | SAMN03565381 | SRR1999373 | 38.7G | 23.5G | male   |
| Tibetan sheep14 (Prairie) | SAMN03565380 | SRR1999372 | 31.7G | 19.3G | male   |
| Small-tailed Han sheep1   | SAMN06161577 | SRR5149614 | 36.3G | 15.2G | female |
| Small-tailed Han sheep2   | SAMN04306131 | SRR3184750 | 15.1G | 5.1G  | female |
| Small-tailed Han sheep3   | SAMN04306129 | SRR3184733 | 14.3G | 4.7G  | female |
| Small-tailed Han sheep4   | SAMN04306128 | SRR3184728 | 18.4G | 6.3G  | female |
| Small-tailed Han sheep5   | SAMN04306127 | SRR3180891 | 15.7G | 7G    | male   |
| Small-tailed Han sheep6   | SAMN04306126 | SRR3180889 | 16.1G | 7.3G  | male   |
| Small-tailed Han sheep7   | SAMN04306125 | SRR3180887 | 14.3G | 6.6G  | male   |
| Small-tailed Han sheep8   | SAMN04306124 | SRR3180874 | 12.5G | 5.6G  | male   |
| Small-tailed Han sheep9   | SAMN04306123 | SRR3180871 | 13.2G | 4.7G  | male   |
| Tan sheep1                | SAMN04521026 | SRR5337772 | 57.5G | 21.0G | male   |
| Tan sheep2                | SAMN04521029 | SRR5337769 | 81.3G | 30.4G | male   |
| Tan sheep3                | SAMN04521031 | SRR5337767 | 84.2G | 31.8G | male   |

|                |              |            |       |       |        |
|----------------|--------------|------------|-------|-------|--------|
| Tan sheep4     | SAMN04521032 | SRR5337766 | 86.0G | 32.8G | male   |
| Tan sheep5     | SAMN04521028 | SRR5337770 | 81.3G | 30.8G | male   |
| Tan sheep6     | SAMN04306110 | SRR3065081 | 17.0G | 6.5G  | female |
| Tan sheep7     | SAMN04306111 | SRR3065082 | 18.0G | 6.8G  | female |
| Tan sheep8     | SAMN04306108 | SRR3065079 | 17.4G | 6.7G  | female |
| Tan sheep9     | SAMN04521027 | SRR5337771 | 97.8G | 37.2G | female |
| Tan sheep10    | SAMN04521030 | SRR5337768 | 81.2G | 31.3G | female |
| Ujimqin sheep1 | SAMN04306122 | SRR3087388 | 13.6G | 4.9G  | female |
| Ujimqin sheep2 | SAMN04306121 | SRR3087381 | 15.1G | 5.4G  | female |
| Ujimqin sheep3 | SAMN04306120 | SRR3087377 | 17.6G | 8.5G  | female |
| Ujimqin sheep4 | SAMN04306118 | SRR3087354 | 17.4G | 5.7G  | female |
| Ujimqin sheep5 | SAMN04306117 | SRR3068478 | 17.9G | 5.9G  | male   |
| Ujimqin sheep6 | SAMN04306116 | SRR3068471 | 18.5G | 6.1G  | male   |
| Ujimqin sheep7 | SAMN04306115 | SRR3068467 | 17.3G | 5.7G  | male   |
| Ujimqin sheep8 | SAMN04306114 | SRR3068457 | 17.8G | 5.9G  | male   |
| Ujimqin sheep9 | SAMN04306113 | SRR3068438 | 18.7G | 6.2G  | male   |
| Hu sheep 1     | SAMN04306092 | SRR3043352 | 18.3G | 9G    | female |
| Hu sheep 2     | SAMN04306091 | SRR3043125 | 19.9G | 6.7G  | female |
| Hu sheep 3     | SAMN04306090 | SRR3036496 | 18.1G | 8.9G  | female |
| Hu sheep 4     | SAMN04306089 | SRR3036494 | 14.5G | 5.6G  | female |
| Hu sheep 5     | SAMN04306088 | SRR3036477 | 19.2G | 8.1G  | female |
| Hu sheep 6     | SAMN04306087 | SRR3036476 | 17.7G | 6.3G  | male   |
| Hu sheep 7     | SAMN04306086 | SRR3036475 | 18.4G | 6.4G  | male   |
| Hu sheep 8     | SAMN04306085 | SRR3023153 | 19.2G | 8.2G  | male   |
| Hu sheep 9     | SAMN04306084 | SRR3023084 | 19.8G | 8.3G  | male   |
| Hu sheep 10    | SAMN04306083 | SRR3023075 | 15.9G | 6.5G  | male   |

|                   |              |            |       |       |        |
|-------------------|--------------|------------|-------|-------|--------|
| Barag sheep1      | SAMN06947432 | SRR5534414 | 14.5G | 5.6G  | male   |
| Barag sheep2      | SAMN06947431 | SRR5534403 | 15.7G | 6.1G  | male   |
| Barag sheep3      | SAMN06947430 | SRR5534400 | 13.5G | 5.3G  | male   |
| Barag sheep4      | SAMN06947429 | SRR5534398 | 14.2G | 5.6G  | male   |
| Barag sheep5      | SAMN06947428 | SRR5534378 | 15.1G | 6G    | female |
| Barag sheep6      | SAMN06947427 | SRR5534377 | 16.1G | 5.7G  | female |
| Barag sheep7      | SAMN06947426 | SRR5534376 | 14.9G | 5.9G  | female |
| Barag sheep8      | SAMN06947425 | SRR5534375 | 14.3G | 5.5G  | female |
| Barag sheep9      | SAMN06947140 | SRR5533820 | 14.9G | 5.9G  | female |
| Barag sheep10     | SAMN06947141 | SRR5533814 | 14.3G | 5.5G  | female |
| Short tail sheep1 | SAMN06947440 | SRR5534686 | 14.2G | 5.6G  | male   |
| Short tail sheep2 | SAMN06947439 | SRR5534612 | 13.7G | 5.4G  | male   |
| Short tail sheep3 | SAMN06947438 | SRR5534607 | 13.2G | 5.3G  | male   |
| Short tail sheep4 | SAMN06947437 | SRR5534552 | 13.2G | 5.3G  | male   |
| Short tail sheep5 | SAMN06947435 | SRR5534535 | 14.2G | 5.6G  | female |
| Short tail sheep6 | SAMN06947434 | SRR5534495 | 15.5G | 6.1G  | female |
| Short tail sheep7 | SAMN06947433 | SRR5534489 | 14.6G | 5.8G  | female |
| White suffolk1    | SAMN07344251 | SRR5991196 | 27.4G | 11.5G | male   |
| White suffolk2    | SAMN07344015 | SRR5991292 | 47.8G | 20.2G | male   |
| White suffolk3    | SAMN07344162 | SRR5991293 | 15.1G | 6.5G  | male   |
| White suffolk4    | SAMN07344178 | SRR5991294 | 36.8G | 14.1G | male   |
| White suffolk5    | SAMN07344029 | SRR5991295 | 34G   | 13.8G | male   |
| White suffolk6    | SAMN07344019 | SRR5991296 | 18.7G | 7.8G  | male   |
| White suffolk7    | SAMN07344018 | SRR5991297 | 64.7G | 27.2G | male   |
| White suffolk8    | SAMN07344017 | SRR5991298 | 54.8G | 23.1G | male   |
| White suffolk9    | SAMN07344016 | SRR5991299 | 63.7G | 27.1G | male   |

|                     |              |            |        |       |        |
|---------------------|--------------|------------|--------|-------|--------|
| White suffolk10     | SAMN07344347 | SRR5991300 | 44.2G  | 19.4G | male   |
| White suffolk11     | SAMN07344125 | SRR5991301 | 72.5G  | 32.2G | male   |
| White suffolk12     | SAMN07344030 | SRR5991302 | 37.9G  | 15.4G | male   |
| White suffolk13     | SAMN07344346 | SRR5991433 | 42.8G  | 18.5G | male   |
| Australian Merino1  | SAMN04302872 | SRR2968869 | 16.2G  | 7.9G  | male   |
| Australian Merino2  | SAMN04302873 | SRR2970522 | 14G    | 6.8G  | male   |
| Australian Merino3  | SAMN04302874 | SRR2970524 | 16.7G  | 8.1G  | male   |
| Australian Merino4  | SAMN04306052 | SRR2976383 | 3.8G   | 1.5G  | female |
| Australian Merino5  | SAMN04306051 | SRR2976380 | 10.3G  | 5.3G  | female |
| Australian Merino6  | SAMN04306050 | SRR2976378 | 15.2G  | 7.8G  | female |
| Australian Merino7  | SAMN04306049 | SRR2973635 | 16.7G  | 8.6G  | female |
| Australian Merino8  | SAMN04306048 | SRR2973610 | 13.4G  | 6.5G  | female |
| Australian Merino9  | SAMN04306047 | SRR2970619 | 18.2G  | 8.8G  | male   |
| Australian Merino10 | SAMN04306046 | SRR2970616 | 17.4G  | 8.4G  | male   |
| Australian Merino11 | SAMN07343995 | SRR5991165 | 105.7G | 47.8G | male   |
| Australian Merino12 | SAMN07344003 | SRR5991323 | 69.4G  | 29.2G | male   |
| Australian Merino13 | SAMN07344008 | SRR5991500 | 46.2G  | 19.4G | male   |
| Australian Merino14 | SAMN07344011 | SRR5991496 | 64G    | 27G   | male   |
| Australian Merino15 | SAMN07344023 | SRR5991273 | 40.5G  | 16.5G | male   |
| Australian Merino16 | SAMN07344143 | SRR5991324 | 44.6G  | 19.4G | male   |
| Australian Merino17 | SAMN07344174 | SRR5991370 | 41G    | 15.4G | male   |
| Australian Merino18 | SAMN07344191 | SRR5991162 | 46G    | 19.2G | male   |
| Australian Merino19 | SAMN07344204 | SRR5991345 | 28.7G  | 11.9G | male   |
| Australian Merino20 | SAMN07344213 | SRR5991366 | 29.3G  | 12.7G | male   |
| Australian Merino21 | SAMN07344226 | SRR5991160 | 48.5G  | 22.2G | male   |
| Australian Merino22 | SAMN07344233 | SRR5991367 | 29.9G  | 12.5G | male   |

|                     |              |            |       |       |      |
|---------------------|--------------|------------|-------|-------|------|
| Australian Merino23 | SAMN07344234 | SRR5991405 | 32.1G | 14G   | male |
| Australian Merino24 | SAMN07344245 | SRR5991161 | 30.2G | 13G   | male |
| Australian Merino25 | SAMN07344326 | SRR5991369 | 40.1G | 17.3G | male |
| Australian Merino26 | SAMN07344337 | SRR5991346 | 38.2G | 16.7G | male |
| Australian Merino27 | SAMN07344232 | SRR5991368 | 49.3G | 20.7G | male |
| Australian Merino28 | SAMN07344344 | SRR5991235 | 41.3G | 18G   | male |
| Border leicester1   | SAMN07343973 | SRR5991214 | 44.6G | 18.9G | male |
| Border leicester2   | SAMN07343974 | SRR5991215 | 21.7G | 9.1G  | male |
| Border leicester3   | SAMN07344129 | SRR5991216 | 37.5G | 16.5G | male |
| Border leicester4   | SAMN07344269 | SRR5991217 | 39.2G | 17.1G | male |
| Border leicester5   | SAMN07344037 | SRR5991334 | 34.6G | 15.5G | male |
| Border leicester6   | SAMN07344164 | SRR5991447 | 36.4G | 13.9G | male |
| Border leicester7   | SAMN07344268 | SRR5991451 | 40.5G | 17.4G | male |
| Border leicester8   | SAMN07343972 | SRR5991455 | 89.7G | 37.8G | male |
| Border leicester9   | SAMN07344127 | SRR5991453 | 34.2G | 14.9G | male |
| Border leicester10  | SAMN07344128 | SRR5991454 | 37.1G | 16.2G | male |
| Poll Dorset1        | SAMN07344185 | SRR5991225 | 53.4G | 22.9G | male |
| Poll Dorset2        | SAMN07344119 | SRR5991226 | 37.5G | 16.8G | male |
| Poll Dorset3        | SAMN07344211 | SRR5991227 | 41.8G | 17.9G | male |
| Poll Dorset4        | SAMN07344319 | SRR5991276 | 37.6G | 16.2G | male |
| Poll Dorset5        | SAMN07344137 | SRR5991394 | 51.8G | 22.9G | male |
| Poll Dorset6        | SAMN07343989 | SRR5991395 | 59.8G | 25G   | male |
| Poll Dorset7        | SAMN07344020 | SRR5991396 | 35G   | 14.3G | male |
| Poll Dorset8        | SAMN07344168 | SRR5991397 | 36.6G | 14G   | male |
| Poll Dorset9        | SAMN07344154 | SRR5991492 | 34.3G | 15.1G | male |
| Poll Dorset10       | SAMN07344246 | SRR5991493 | 41.6G | 17.5G | male |

---

**Supplementary Table S3** Primers used for KASPar detection.

| Primer's purpose | Primer name           | Primer sequence                              |
|------------------|-----------------------|----------------------------------------------|
| KAspar           | <i>IFI44</i> _AlleleX | GAAGGTGACCAAGTTCATGCTCCACACAATGGATTCTGTCCTTG |
|                  | <i>IFI44</i> _AlleleY | GAAGGTCGGAGTCAACGGATTCCACACAATGGATTCTGTCCTTC |
|                  | <i>IFI44</i> _Common  | AAGGCATTGGTAACCATACAGGCTG                    |

**Supplementary Table S4** Distribution of SNPs within different genomic regions.

| Category       | Number of SNPs |
|----------------|----------------|
| Intergenic     | 21661272       |
| Upstream       | 273106         |
| Downstream     | 320038         |
| NcRNA_exonic   | 276728         |
| NcRNA_intronic | 1184564        |
| NcRNA_splicing | 527            |
| UTR5           | 207156         |
| UTR3           | 268918         |
| Intronic       | 14611625       |
| Exonic         | 535578         |
| Splicing       | 1263           |
| Total SNP      | 39331475       |

**Supplementary Table S5** Statistics on allele frequency changes in 30 sheep breeds.



| Group                             | Breed                      | Name        | (0,25] | (25,50] | (50,75] | (75,100] |
|-----------------------------------|----------------------------|-------------|--------|---------|---------|----------|
| African                           | Timahdite                  | TI          | 79.758 | 16.960  | 2.995   | 0.287    |
|                                   | Ouled Djellal              | OD          | 80.218 | 16.381  | 3.122   | 0.278    |
|                                   | Beni Guil                  | BG          | 80.201 | 16.382  | 3.139   | 0.278    |
|                                   | Sardi                      | SA          | 80.097 | 16.454  | 3.172   | 0.278    |
|                                   | D'man                      | DM          | 80.580 | 16.262  | 2.922   | 0.236    |
|                                   | Altay sheep                | AL          | 78.117 | 17.259  | 4.075   | 0.548    |
|                                   | Tibetan sheep (Oula)       | OU          | 77.717 | 17.748  | 4.028   | 0.507    |
|                                   | Barag sheep                | BAR         | 78.487 | 17.224  | 3.810   | 0.479    |
|                                   | Tibetan sheep (Prairie)    | PT          | 78.411 | 17.221  | 3.909   | 0.460    |
|                                   | Qira Black sheep           | CB          | 78.143 | 17.546  | 3.859   | 0.452    |
| Chinese                           | Short tail sheep           | ST          | 78.815 | 17.150  | 3.587   | 0.448    |
|                                   | Small tailed han sheep     | STH         | 78.372 | 17.442  | 3.756   | 0.430    |
|                                   | Valley Tibetan             | VT          | 78.920 | 16.920  | 3.743   | 0.416    |
|                                   | Large-tailed Han sheep     | LH          | 78.839 | 17.046  | 3.698   | 0.416    |
|                                   | Hu sheep                   | HU          | 78.735 | 17.191  | 3.666   | 0.408    |
|                                   | Tan sheep                  | TAN         | 78.656 | 17.285  | 3.660   | 0.399    |
|                                   | Lanzhou large-tailed sheep | LL          | 79.322 | 16.744  | 3.547   | 0.387    |
|                                   | Bayinbuluke sheep          | BAY         | 79.135 | 17.045  | 3.467   | 0.354    |
|                                   | Ujimqin sheep              | UJ          | 79.136 | 17.075  | 3.439   | 0.350    |
|                                   | Mongolian sheep            | MG          | 79.866 | 16.462  | 3.334   | 0.338    |
|                                   | Border leicester           | BL          | 73.588 | 19.100  | 5.984   | 1.328    |
|                                   | East Friesian milk sheep   | EF          | 74.346 | 18.573  | 5.819   | 1.262    |
|                                   | Improved breeds            | Texel sheep | TE     | 75.612  | 18.257  | 5.191    |
| South African mutton merino sheep |                            | NM          | 76.296 | 18.064  | 4.786   | 0.854    |
| Dorper sheep                      |                            | DP          | 75.952 | 18.258  | 4.963   | 0.827    |

|                        |    |        |        |       |       |
|------------------------|----|--------|--------|-------|-------|
| Black Suffolk sheep    | BS | 77.198 | 17.795 | 4.359 | 0.649 |
| Australian white sheep | AW | 76.848 | 18.035 | 4.468 | 0.648 |
| Dorset polled          | PD | 77.115 | 17.862 | 4.445 | 0.578 |
| White suffolk          | WS | 78.769 | 17.268 | 3.576 | 0.387 |
| Australian merino      | AM | 79.352 | 16.877 | 3.411 | 0.360 |

**Supplementary Table S6** Putatively selected regions in domestic sheep.

| No. | Combined region (Mb) | Chromosome | Position  |           | Gene name                                                                                                                                         |
|-----|----------------------|------------|-----------|-----------|---------------------------------------------------------------------------------------------------------------------------------------------------|
|     |                      |            | Start     | End       |                                                                                                                                                   |
| 1   | Chr1: 20.4-20.55     | 1          | 20400001  | 20550000  | <i>PIK3R3, TSPAN1, POMGNT1, TRNAC-ACA, PIK3R3-TSPAN1</i>                                                                                          |
| 2   | Chr1: 50.77-50.92    | 1          | 50775001  | 50925000  | <i>LHX8, SLC44A5, TYW3-LHX8, LHX8-SLC44A5</i>                                                                                                     |
| 3   | Chr1: 54.375-54.525  | 1          | 54300001  | 54450000  | <i>PTGFR, LOC105613526, LOC101110201, LOC101103103, IFI44L, IFI44, LOC105613526-LOC101103103, LOC101110201-IFI44L, IFI44L-IFI44, IFI44-ADGRL4</i> |
|     |                      | 1          | 54375001  | 54525000  | <i>IFI44L, IFI44, IFI44L-IFI44, IFI44-ADGRL4</i>                                                                                                  |
| 4   | Chr1: 63.075-63.225  | 1          | 63075001  | 63225000  | <i>LOC101116267, LOC105609232, LOC106990167, SH3GLB1, LOC106990167-LOC101116267, LOC105609232-SH3GLB1, SH3GLB1-LOC105614834</i>                   |
|     |                      | 1          | 119400001 | 119550000 | <i>MRPS6, SLC5A3, KCNE2-MRPS6, MRPS6-ATP5O</i>                                                                                                    |
| 5   | Chr1: 119.4-199.65   | 1          | 199425001 | 199575000 | <i>IGF2BP2, TRA2B-IGF2BP2</i>                                                                                                                     |
|     |                      | 1          | 199500001 | 199650000 | <i>IGF2BP2, SENP2, IGF2BP2-SENP2</i>                                                                                                              |
| 6   | Chr2: 37.275-37.425  | 2          | 37275001  | 37425000  | <i>UBAP2, UBE2R2, DCAF12-UBAP2</i>                                                                                                                |

|    |                          |   |           |           |                                                                                                          |
|----|--------------------------|---|-----------|-----------|----------------------------------------------------------------------------------------------------------|
| 7  | Chr2: 71.1-71.325        | 2 | 71100001  | 71250000  | <i>RFX3</i>                                                                                              |
|    |                          | 2 | 71175001  | 71325000  | <i>RFX3</i>                                                                                              |
| 8  | Chr2: 72.075-72.225      | 2 | 72075001  | 72225000  | <i>GLIS3, GLIS3-LOC106990941</i>                                                                         |
|    |                          | 2 | 114975001 | 115125000 | <i>LOC101106660-LOC101117569</i>                                                                         |
|    |                          | 2 | 115050001 | 115200000 | <i>LOC101106660-LOC101117569</i>                                                                         |
| 9  | Chr2: 114.975-115.35     | 2 | 115125001 | 115275000 | <i>LOC101117569, LOC101106660-LOC101117569</i>                                                           |
|    |                          | 2 | 115200001 | 115350000 | <i>LOC101117569, LOC101106660-LOC101117569, LOC101117569-LOC105608719</i>                                |
| 10 | Chr2: 122.25-122.475     | 2 | 122250001 | 122400000 | <i>LOC101122056, LOC101120641-LOC101122056, LOC101122056-FSIP2</i>                                       |
|    |                          | 2 | 122325001 | 122475000 | <i>FSIP2, LOC101122056, LOC101120641-LOC101122056, LOC101122056-FSIP2</i>                                |
| 11 | Chr2: 122.625-122.85     | 2 | 122625001 | 122775000 | <i>LOC105608888, LOC105608888-LOC101121406</i>                                                           |
|    |                          | 2 | 122700001 | 122850000 | <i>LOC105608888-LOC101121406</i>                                                                         |
| 12 | Chr2: 123-123.15         | 2 | 123000001 | 123150000 | <i>LOC105608888-LOC101121406</i>                                                                         |
| 13 | Chr2: 184.95-185.1       | 2 | 184950001 | 185100000 | <i>LOC105609957-TRNAW-CCA, TRNAW-CCA, TRNAW-CCA-GLI2</i>                                                 |
| 14 | Chr2: 213.75-213.9       | 2 | 213750001 | 213900000 | <i>IKZF2, LOC105610530, LOC105611887-LOC105610530, LOC105610530-IKZF2</i>                                |
| 15 | Chr2:<br>214.275-214.425 | 2 | 214275001 | 214425000 | <i>SPAG16</i>                                                                                            |
| 16 | Chr2:<br>219.375-219.525 | 2 | 219375001 | 219525000 | <i>CTDSP1, rna8716, RQCD1, SLC11A1, USP37, VIL1</i>                                                      |
| 17 | Chr3: 1.65-1.8           | 3 | 1650001   | 1800000   | <i>ANAPC2, LOC101109608, LOC106990978, NDOR1, RNF224, SSNA1, TMEM203, TPRN,<br/>LOC105607205-TMEM210</i> |

|    |                          |   |           |           |                                                                                                                                                      |
|----|--------------------------|---|-----------|-----------|------------------------------------------------------------------------------------------------------------------------------------------------------|
| 18 | Chr3: 18.075-18.3        | 3 | 18075001  | 18225000  | <i>KIDINS220, MBOAT2, KIDINS220-MBOAT2, MBOAT2-LOC101102303</i>                                                                                      |
|    |                          | 3 | 18150001  | 18300000  | <i>LOC101102303, MBOAT2, MBOAT2-LOC101102303, LOC101102303-ASAP2</i>                                                                                 |
| 19 | Chr3: 94.425-94.65       | 3 | 94425001  | 94575000  | <i>EXOC6B, LOC105614905, LOC106991063</i>                                                                                                            |
|    |                          | 3 | 94500001  | 94650000  | <i>LOC105614905, EXOC6B-SPR, EXOC6B</i>                                                                                                              |
| 20 | Chr3: 97.725-97.875      | 3 | 97725001  | 97875000  | <i>LOC105612338-TMEM182</i>                                                                                                                          |
|    |                          | 3 | 124575001 | 124725000 | <i>KITLG, KITLG-TRNAG-CCC, TRNAG-CCC</i>                                                                                                             |
| 21 | Chr3:<br>124.575-124.875 | 3 | 124650001 | 124800000 | <i>TRNAG-CCC, KITLG-TRNAG-CCC, TRNAG-CCC-LOC101105320</i>                                                                                            |
|    |                          | 3 | 124725001 | 124875000 | <i>TRNAG-CCC, TRNAG-CCC-LOC101105320</i>                                                                                                             |
| 22 | Chr3: 129.6-129.75       | 3 | 129600001 | 129750000 | <i>SOCS2-CRADD, CRADD</i>                                                                                                                            |
| 23 | Chr3:<br>153.525-153.675 | 3 | 153525001 | 153675000 | <i>HMGA2-LOC105609945, HMGA2</i>                                                                                                                     |
|    |                          | 3 | 162075001 | 162225000 | <i>GPR182, TAC3-ZBTB39, LOC105612238-LOC101104222, LOC101104222,<br/>LOC105612238, LOC105612239, MYO1A, NEMP1, SDR9C7, TAC3, ZBTB39</i>              |
| 24 | Chr3: 162.075-162.3      | 3 | 162150001 | 162300000 | <i>LOC105612238-LOC101104222, LOC101104897-LOC101105146, LOC101104222,<br/>LOC101104897, LOC105612238, LOC105612239, SDR9C7, SDR9C7-LOC101104897</i> |
| 25 | Chr3: 213.6-213.75       | 3 | 213600001 | 213750000 | <i>BAIAP2L2, MAFF, PLA2G6, PLA2G6-MAFF, SLC16A8, TMEM184B</i>                                                                                        |
| 26 | Chr4: 23.7-23.85         | 4 | 23700001  | 23850000  | <i>AGMO</i>                                                                                                                                          |

|    |                          |   |           |           |                                                                                                                                           |
|----|--------------------------|---|-----------|-----------|-------------------------------------------------------------------------------------------------------------------------------------------|
| 27 | Chr4: 63-63.225          | 4 | 63000001  | 63150000  | <i>BMPER-LOC105612117, LOC105612117-BBS9, LOC105612117</i>                                                                                |
|    |                          | 4 | 63075001  | 63225000  | <i>BBS9, BMPER-LOC105612117, LOC105612117-BBS9, LOC105612117</i>                                                                          |
| 28 | Chr4: 78.825-78.975      | 4 | 78825001  | 78975000  | <i>GLI3</i>                                                                                                                               |
| 29 | Chr4: 101.625-101.85     | 4 | 101625001 | 101775000 | <i>AKR1D1-TRIM24</i>                                                                                                                      |
|    |                          | 4 | 101700001 | 101850000 | <i>AKR1D1-TRIM24</i>                                                                                                                      |
| 30 | Chr4: 111.75-111.9       | 4 | 111750001 | 111900000 | <i>ZNF777-ZNF746, ZNF746-TRNAC-GCA, LOC106991146, TRNAC-GCA, TRNAC-GCA-LOC106991146, ZNF746, ZNF777</i>                                   |
| 31 | Chr5: 7.5-7.725          | 5 | 7500001   | 7650000   | <i>AKAP8, AKAP8L, EPHX3, AKAP8-LOC101123297, EPHX3-NOTCH3, LOC101123297, LOC105615346, NOTCH3</i>                                         |
|    |                          | 5 | 7575001   | 7725000   | <i>AKAP8-LOC101123297, LOC101123297, LOC105615346, EPHX3, EPHX3-NOTCH3, LOC101101981, LOC101120324, LOC101120324-LOC101101981, NOTCH3</i> |
| 32 | Chr5:<br>106.875-107.475 | 5 | 106875001 | 107025000 | <i>SLC25A46-LOC105615337, SLC25A46</i>                                                                                                    |
|    |                          | 5 | 106950001 | 107100000 | <i>LOC105615337-WDR36, LOC105615337, SLC25A46-LOC105615337</i>                                                                            |
|    |                          | 5 | 107025001 | 107175000 | <i>SLC25A46-LOC105615337, LOC105615337, LOC105615337-WDR36</i>                                                                            |
|    |                          | 5 | 107100001 | 107250000 | <i>LOC105615337-WDR36</i>                                                                                                                 |

|    |                     |   |           |           |                                                                                                      |
|----|---------------------|---|-----------|-----------|------------------------------------------------------------------------------------------------------|
|    |                     | 5 | 107175001 | 107325000 | <i>LOC105615337-WDR36, WDR36</i>                                                                     |
|    |                     | 5 | 107250001 | 107400000 | <i>LOC105615337-WDR36, WDR36, LOC106991207, LOC106991207-LOC105615338, WDR36-LOC106991207</i>        |
|    |                     | 5 | 107325001 | 107475000 | <i>CAMK4, WDR36-LOC106991207, LOC106991207-LOC105615338, LOC105615338-CAMK4, LOC106991207, WDR36</i> |
|    |                     | 6 | 24600001  | 24750000  | <i>H2AFZ, LOC106990491-H2AFZ, LOC106990491, TRNAC-GCA-LOC106990491</i>                               |
| 33 | Chr6: 24.6-24.975   | 6 | 24675001  | 24825000  | <i>DAPP1, DNAJB14, H2AFZ, LOC106990491-H2AFZ, LAMTOR3, LOC106990491, TRNAC-GCA-LOC106990491</i>      |
|    |                     | 6 | 24750001  | 24900000  | <i>LAMTOR3, DAPP1-LOC105612764, H2AFZ, DNAJB14, DAPP1</i>                                            |
|    |                     | 6 | 24825001  | 24975000  | <i>DAPP1, DAPP1-LOC105612764</i>                                                                     |
| 34 | Chr6: 44.625-44.775 | 6 | 44625001  | 44775000  | <i>ANAPC4, PI4K2B-ZCCHC4, ANAPC4-SLC34A2, PI4K2B, ZCCHC4</i>                                         |
| 35 | Chr6: 53.55-53.775  | 6 | 53550001  | 53700000  | <i>LOC101109539-TRNAC-GCA</i>                                                                        |
|    |                     | 6 | 53625001  | 53775000  | <i>LOC101109539-TRNAC-GCA</i>                                                                        |
|    |                     | 6 | 80025001  | 80175000  | <i>LOC106991226-LOC101119727</i>                                                                     |
| 36 | Chr6: 80.025-81.75  | 6 | 81525001  | 81675000  | <i>LOC101120245-TRNAW-CCA</i>                                                                        |
|    |                     | 6 | 81600001  | 81750000  | <i>LOC101120245-TRNAW-CCA</i>                                                                        |
| 37 | Chr6: 115.875-116.1 | 6 | 115875001 | 116025000 | <i>WHSC1-LETMI, LETMI, LOC106991222, WHSC1</i>                                                       |

|    |                      |    |           |           |                                                                                                                 |
|----|----------------------|----|-----------|-----------|-----------------------------------------------------------------------------------------------------------------|
|    |                      | 6  | 115950001 | 116100000 | <i>TMEM129, SLBP, LOC106991222, LOC106990166, LETM1, SLBP-CTBP1, WHSC1-LETM1</i>                                |
| 38 | Chr6: 116.4-116.55   | 6  | 116400001 | 116550000 | <i>CPLX1, DGKQ, GAK, TMEM175-GAK, GAK-CPLX1, CPLX1-LOC105615565, TMEM175</i>                                    |
| 39 | Chr7: 43.425-43.575  | 7  | 43425001  | 43575000  | <i>FBXL22, USP3</i>                                                                                             |
| 40 | Chr7: 72.525-72.675  | 7  | 72525001  | 72675000  | <i>LOC105615745, PPP2R5E</i>                                                                                    |
| 41 | Chr8: 89.4-89.625    | 8  | 89400001  | 89550000  | <i>SMOC2-THBS2</i>                                                                                              |
|    |                      | 8  | 89475001  | 89625000  | <i>SMOC2-THBS2</i>                                                                                              |
| 42 | Chr9: 25.35-25.5     | 9  | 25350001  | 25500000  | <i>LOC106990507, LOC106990507-MYC, LOC105616004-LOC106990507</i>                                                |
| 43 | Chr9: 30.825-30.975  | 9  | 30825001  | 30975000  | <i>LOC101110341-LOC101110602, LOC101110602-TRNAM-CAU, LOC101110068-LOC101110341, LOC101110341, LOC101110602</i> |
| 44 | Chr9: 36-36.225      | 9  | 36000001  | 36150000  | <i>CHCHD7, RPS20-MOS, MOS-PLAG1, CHCHD7-SDR16C5, MOS, PLAG1, RPS20</i>                                          |
|    |                      | 9  | 36075001  | 36225000  | <i>CHCHD7, CHCHD7-SDR16C5, SDR16C5-LOC101116323, LOC101116323, PLAG1, SDR16C5</i>                               |
| 45 | Chr9: 37.735-37.95   | 9  | 37725001  | 37875000  | <i>TOX</i>                                                                                                      |
|    |                      | 9  | 37800001  | 37950000  | <i>TRNAC-GCA, TOX</i>                                                                                           |
| 46 | Chr10: 7.425-7.65    | 10 | 7425001   | 7575000   | <i>LOC101105926-LOC101121613</i>                                                                                |
|    |                      | 10 | 7500001   | 7650000   | <i>LOC101105926-LOC101121613</i>                                                                                |
| 47 | Chr10: 31.875-32.025 | 10 | 31875001  | 32025000  | <i>PAN3, FLT1</i>                                                                                               |
| 48 | Chr10: 37.5-38.025   | 10 | 37500001  | 37650000  | <i>ATP12A-LOC105614068</i>                                                                                      |

|    |                      |    |          |          |                                                                                                                              |
|----|----------------------|----|----------|----------|------------------------------------------------------------------------------------------------------------------------------|
|    |                      | 10 | 37575001 | 37725000 | <i>LOC105614068-LOC101120586, LOC105614068, ATP12A-LOC105614068</i>                                                          |
|    |                      | 10 | 37650001 | 37800000 | <i>LOC105614068-LOC101120586, LOC105614068, ATP12A-LOC105614068</i>                                                          |
|    |                      | 10 | 37725001 | 37875000 | <i>LOC105614068-LOC101120586</i>                                                                                             |
|    |                      | 10 | 37800001 | 37950000 | <i>LOC105614068-LOC101120586</i>                                                                                             |
|    |                      | 10 | 37875001 | 38025000 | <i>LOC105614068-LOC101120586, LOC101120586-LOC101120503, LOC101120586</i>                                                    |
| 49 | Chr10: 41.775-41.925 | 10 | 41775001 | 41925000 | <i>LOC101121273-LOC101121526</i>                                                                                             |
| 50 | Chr10: 42.6-42.75    | 10 | 42600001 | 42750000 | <i>LOC101121526-TRNAW-CCA</i>                                                                                                |
| 51 | Chr10: 43.35-43.5    | 10 | 43350001 | 43500000 | <i>LOC101121526-TRNAW-CCA</i>                                                                                                |
| 52 | Chr10: 75.15-75.3    | 10 | 75150001 | 75300000 | <i>LOC105616225, LOC105616225-UBAC2, DOCK9</i>                                                                               |
| 53 | Chr11: 10.725-10.875 | 11 | 10725001 | 10875000 | <i>BRIPI, INTS2</i>                                                                                                          |
| 54 | Chr11: 24.6-24.75    | 11 | 24600001 | 24750000 | <i>XAF1, TEKTI, SMTNL2, MYBBP1A, LOC105610748, LOC105610740, LOC101112994, XAF1-LOC101112994, TEKTI-SMTNL2, GGT6, FBXO39</i> |
| 55 | Chr12: 78.75-78.9    | 12 | 78750001 | 78900000 | <i>SHISA4, NAV1, LOC105610031, IPO9, LOC105610030-LOC105610031, SHISA4-LOC105610030</i>                                      |
| 56 | Chr13: 49.2-49.35    | 13 | 49200001 | 49350000 | <i>LOC101110166-LOC101110438</i>                                                                                             |
|    |                      | 13 | 49500001 | 49650000 | <i>LOC101110166-LOC101110438</i>                                                                                             |
| 57 | Chr13: 49.5-49.95    | 13 | 49575001 | 49725000 | <i>LOC101110166-LOC101110438, LOC101110438, LOC101110438-HAO1</i>                                                            |



|    |                      |          |          |                                                                                                                            |
|----|----------------------|----------|----------|----------------------------------------------------------------------------------------------------------------------------|
|    | 13                   | 49650001 | 49800000 | <i>LOC101110438-HAO1, LOC101110166-LOC101110438, LOC101110438</i>                                                          |
|    | 13                   | 49725001 | 49875000 | <i>LOC101110438-HAO1</i>                                                                                                   |
|    | 13                   | 49800001 | 49950000 | <i>HAO1, LOC101110438-HAO1</i>                                                                                             |
|    | 13                   | 50175001 | 50325000 | <i>SMOX, SMOX-LOC105606258, ADRA1D-SMOX, ADRA1D</i>                                                                        |
|    | 13                   | 50250001 | 50400000 | <i>LOC105606258-RNF24, LOC105606258, SMOX-LOC105606258</i>                                                                 |
| 58 | Chr13: 50.175-50.625 |          |          |                                                                                                                            |
|    | 13                   | 50325001 | 50475000 | <i>SMOX-LOC105606258, LOC105606258, LOC105606258-RNF24, RNF24</i>                                                          |
|    | 13                   | 50400001 | 50550000 | <i>PANK2, LOC105606258-RNF24, RNF24</i>                                                                                    |
|    | 13                   | 50475001 | 50625000 | <i>AP5S1, PANK2-MAVS, LOC105606256-AP5S1, MAVS, PANK2, RNF24</i>                                                           |
| 59 | Chr13: 53.175-53.325 |          |          | <i>ABHD16B, ARFRP1, ABHD16B-ZBTB46, LIME1, RTEL1, STMN3, TNFRSF6B, TPD52L2, ZBTB46, ZGPAT</i>                              |
| 60 | Chr13: 63-63.15      |          |          | <i>LOC101112245-ASIP, ASIP, ASIP-AHCY</i>                                                                                  |
|    | 14                   | 34275001 | 34425000 | <i>AGRP, ATP6V0D1, CTCF, FAM65A, HSD11B2, FAM65A-LOC106991595, LOC105606370, LOC105606370-FAM65A, LOC106991595, ZDHHC1</i> |
| 61 | Chr14: 34.275-34.575 |          |          |                                                                                                                            |
|    | 14                   | 34350001 | 34500000 | <i>ACD, ACTB, C14H16orf86, CTCF, FAM65A, GFOD2, FAM65A-LOC106991595, LOC105606370-FAM65A, LOC106991595, PARD6A, RLTPR</i>  |

|    |                      |    |          |          |                                                                                                                                                                                                                                                                                                        |
|----|----------------------|----|----------|----------|--------------------------------------------------------------------------------------------------------------------------------------------------------------------------------------------------------------------------------------------------------------------------------------------------------|
|    |                      | 14 | 34425001 | 34575000 | <i>ACD, ACTB, C14H16orf86, CTCF, GFOD2, PARD6A, RANBP10, RLTPR, TRNAG-CCC, TSNAXIP1</i>                                                                                                                                                                                                                |
| 62 | Chr15: 21.825-21.975 | 15 | 21825001 | 21975000 | <i>BCO2, IL18, LOC101112255, LOC105602162, PTS, TEX12</i>                                                                                                                                                                                                                                              |
| 63 | Chr15: 47.55-47.7    | 15 | 47550001 | 47700000 | <i>LOC101104933-LOC101105186, LOC101105186-LOC101105439, LOC101105686-LOC101105946, LOC101106712, LOC101104177, LOC101104177-LOC101104426, LOC101104426, LOC101104685, LOC101104933, LOC101105186, LOC101105439, LOC101105686, LOC101105946, LOC101106201, LOC101106459, LOC101106459-LOC101106712</i> |
| 64 | Chr16: 70.8-70.95    | 16 | 70800001 | 70950000 | <i>TRIP13, TPPP, LOC105602658, LOC105602658-LOC101110873, TRIP13-LOC105602658, CEP72, BRD9</i>                                                                                                                                                                                                         |
| 65 | Chr17: 33-33.15      | 17 | 33000001 | 33150000 | <i>LOC101101922-LOC105608293, ANKRD50-LOC101101922, LOC101101922</i>                                                                                                                                                                                                                                   |
| 66 | Chr17: 45.45-45.6    | 17 | 45450001 | 45600000 | <i>ADGRD1, LOC106990371-ADGRD1</i>                                                                                                                                                                                                                                                                     |
| 67 | Chr17: 52.125-52.275 | 17 | 52125001 | 52275000 | <i>ABCB9, ARL6IP4, CCDC62, HIP1R, OGFOD2, VPS37B</i>                                                                                                                                                                                                                                                   |
| 68 | Chr17: 52.425-52.575 | 17 | 52425001 | 52575000 | <i>ZCCHC8, RSRC2, KNTC1, CLIP1</i>                                                                                                                                                                                                                                                                     |
| 69 | Chr17: 53.475-53.7   | 17 | 53475001 | 53625000 | <i>CAMKK2, P2RX4-P2RX7, P2RX7-IFT81, IFT81, P2RX4, P2RX7</i>                                                                                                                                                                                                                                           |
|    |                      | 17 | 53550001 | 53700000 | <i>P2RX7-IFT81, IFT81, P2RX7</i>                                                                                                                                                                                                                                                                       |
| 70 | Chr17: 59.4-59.55    | 17 | 59400001 | 59550000 | <i>LOC105602894-TBX3</i>                                                                                                                                                                                                                                                                               |

|    |                      |    |          |          |                                                                                                                            |
|----|----------------------|----|----------|----------|----------------------------------------------------------------------------------------------------------------------------|
| 71 | Chr17: 64.95-65.1    | 17 | 64950001 | 65100000 | <i>ADRBK2, CRYBB2, CRYBB2-ADRBK2, CRYBB3, KIAA1671</i>                                                                     |
| 72 | Chr18: 23.625-23.85  | 18 | 23625001 | 23775000 | <i>MEX3B-MORF4L1</i>                                                                                                       |
|    |                      | 18 | 23700001 | 23850000 | <i>MEX3B-MORF4L1</i>                                                                                                       |
| 73 | Chr18: 29.325-29.475 | 18 | 29325001 | 29475000 | <i>TRNAS-CGA, TBC1D2B, LOC101113889, ADAMTS7</i>                                                                           |
|    |                      | 18 | 32100001 | 32250000 | <i>SNUPN-PTPN9, IMP3, PTPN9, SNUPN, SNX33</i>                                                                              |
|    |                      | 18 | 32175001 | 32325000 | <i>SIN3A, PTPN9, MAN2C1</i>                                                                                                |
| 74 | Chr18: 32.1-32.475   | 18 | 32250001 | 32400000 | <i>COMMD4, COMMD4-LOC105603152, LOC105603152, LOC105603296, MAN2C1, NEIL1, PTPN9, SIN3A</i>                                |
|    |                      | 18 | 32325001 | 32475000 | <i>C18H15orf39, COMMD4, LOC105603152, LOC105603154, LOC105603296, MAN2C1, NEIL1, SIN3A</i>                                 |
| 75 | Chr18: 45.075-45.6   | 18 | 45075001 | 45225000 | <i>BRMSIL-LOC101104531, LOC101104787-LOC106991743, LOC101104531, LOC101104531-LOC101104787, LOC101104787, LOC106991743</i> |
|    |                      | 18 | 45150001 | 45300000 | <i>LOC101104787-LOC106991743, LOC101104787, LOC106991743</i>                                                               |
|    |                      | 18 | 45225001 | 45375000 | <i>MBIP-LOC106991744, LOC106991743, MBIP</i>                                                                               |
|    |                      | 18 | 45375001 | 45525000 | <i>MBIP-LOC106991744, LOC106991743, LOC106991745</i>                                                                       |

|    |                      |    |          |          |                                                                                                                    |
|----|----------------------|----|----------|----------|--------------------------------------------------------------------------------------------------------------------|
|    |                      | 18 | 45450001 | 45600000 | <i>NKX2-1, LOC106991745, LOC106991744</i>                                                                          |
|    |                      | 18 | 65850001 | 66000000 | <i>ANKRD9-RCOR1, ANKRD9</i>                                                                                        |
| 76 | Chr18: 65.85-66.15   | 18 | 65925001 | 66075000 | <i>RCOR1, RCOR1-TRAF3, ANKRD9-RCOR1</i>                                                                            |
|    |                      | 18 | 66000001 | 66150000 | <i>TRAF3, RCOR1, RCOR1-TRAF3, ANKRD9-RCOR1</i>                                                                     |
| 77 | Chr19: 60.375-60.525 | 19 | 60375001 | 60525000 | <i>LOC106990579, KLF15, KLF15-CFAP100, CFAP100</i>                                                                 |
| 78 | Chr20: 10.8-10.95    | 20 | 10800001 | 10950000 | <i>PPIL1, PI16, MTCH1-LOC105603679, MTCH1, LOC105603679-FGD2, LOC105603679, FGD2, CPNE5-PPIL1, C20H6orf89-PI16</i> |
|    |                      | 20 | 15000001 | 15150000 | <i>TRNAG-UCC, TREML2-TREM1, TREML2, TREML1, TREM2-TREML2, TREM2, OARD1, NFYA, LOC101108001, APOBEC2</i>            |
| 79 | Chr20: 15-15.225     |    |          |          |                                                                                                                    |
|    |                      | 20 | 15075001 | 15225000 | <i>LOC101108001, TREM1, TREM1-LOC105603703, TREM2, TREM2-TREML2, TRNAG-UCC, TREML1, TREML2, TREML2-TREM1</i>       |
|    |                      | 20 | 49950001 | 50100000 | <i>LOC105603912, GMDS</i>                                                                                          |
|    |                      | 20 | 50025001 | 50175000 | <i>LOC105603912, GMDS</i>                                                                                          |
|    |                      | 20 | 50100001 | 50250000 | <i>LOC105603912, GMDS</i>                                                                                          |
| 80 | Chr20: 49.95-50.4    | 20 | 50175001 | 50325000 | <i>LOC105603912, GMDS, FOXC1-TRNAS-GGA, FOXC1</i>                                                                  |
|    |                      | 20 | 50250001 | 50400000 | <i>TRNAS-GGA-LOC106990336, GMDS, FOXC1</i>                                                                         |
|    |                      | 20 | 50700001 | 50850000 | <i>IRF4, EXOC2</i>                                                                                                 |
| 81 | Chr20: 50.7-51.15    | 20 | 50775001 | 50925000 | <i>DUSP22, EXOC2, EXOC2-IRF4, IRF4, IRF4-DUSP22</i>                                                                |

|    |                      |    |          |          |                                                                                                                                         |
|----|----------------------|----|----------|----------|-----------------------------------------------------------------------------------------------------------------------------------------|
|    |                      | 20 | 50850001 | 51000000 | <i>DUSP22, IRF4, IRF4-DUSP22, LOC105603919</i>                                                                                          |
|    |                      | 20 | 50925001 | 51075000 | <i>DUSP22, LOC105603919, LOC105603919-CHR_END</i>                                                                                       |
|    |                      | 20 | 51000001 | 51150000 | <i>LOC105603919-CHR_END</i>                                                                                                             |
| 82 | Chr21: 39.15-39.3    | 21 | 39150001 | 39300000 | <i>CPSF7, DDB1, LOC101106637, LOC105604096, LRRC10B, PPP1R32, PPP1R32-LRRC10B, SDHAF2, SDHAF2-PPP1R32, SYT7, TKFC, TMEM138, TMEM216</i> |
| 83 | Chr21: 49.35-49.5    | 21 | 49350001 | 49500000 | <i>RNHI, RASSF7, PTDSS2, PHRF1, LRRC56, LOC106991826, LMNTD2, IRF7, HRAS, CDHR5</i>                                                     |
| 84 | Chr21: 49.575-49.8   | 21 | 49575001 | 49725000 | <i>PSMD13, NLRP6-PSMD13, NLRP6, LOC105604159-LOC101105867, LOC105604159, LOC101105867, IFITM5, IFITM3, B4GALNT4, ATHL1</i>              |
|    |                      | 21 | 49650001 | 49800000 | <i>SIRT3, SCGB1C1, RIC8A, PSMD13, ODF3, NLRP6-PSMD13, NLRP6, IFITM5, BET1L, ATHL1</i>                                                   |
| 85 | Chr24: 10.35-10.5    | 24 | 10350001 | 10500000 | <i>ZC3H7A, TXNDC11, SNN, LOC105604663, LITAF-SNN</i>                                                                                    |
|    | Chr24: 32.625-32.775 | 24 | 32625001 | 32775000 | <i>GTF2I, LOC101112784, NCF1, TRNAC-ACA</i>                                                                                             |
| 86 | Chr24: 34.575-34.8   | 24 | 34575001 | 34725000 | <i>TRNAG-CCC, TRNAE-UUC, LOC106991890, LOC105604781, LOC105604780, CUX1</i>                                                             |
|    |                      | 24 | 34650001 | 34800000 | <i>CUX1, LOC105604780</i>                                                                                                               |
| 87 | Chr24: 41.55-42.075  | 24 | 41550001 | 41700000 | <i>LOC106991921, LOC105604883, DNAAF5</i>                                                                                               |

|    |                         |    |           |           |                                   |
|----|-------------------------|----|-----------|-----------|-----------------------------------|
|    |                         | 24 | 41625001  | 41775000  | <i>LOC106991898, FAM20C</i>       |
|    |                         | 24 | 41700001  | 41850000  | <i>LOC106991898, FAM20C</i>       |
|    |                         | 24 | 41850001  | 42000000  | <i>LOC105604839, LOC105604839</i> |
|    |                         | 24 | 41925001  | 42075000  | <i>LOC105604839</i>               |
| 88 | Chr27: 76.275-76.5      | X  | 76275001  | 76425000  | <i>LOC101106825</i>               |
|    |                         | X  | 76350001  | 76500000  | <i>LOC101116810</i>               |
| 89 | Chr27:<br>135.075-135.5 | X  | 135075001 | 135225000 | <i>PABPC5</i>                     |
|    |                         | X  | 135150001 | 135300000 | <i>PABPC5</i>                     |

**Supplementary Table S7** Kyoto Encyclopedia of Genes and Genomes (KEGG) enrichment analysis of candidate genes during domestication.

| Term                                    | Input number | Background number | P-Value    | Input                                            |
|-----------------------------------------|--------------|-------------------|------------|--------------------------------------------------|
| Thyroid hormone signaling pathway       | 5            | 121               | 0.0037528  | <i>HRAS, SIN3A, PIK3R3, ACTB, NOTCH3</i>         |
| Hepatitis B                             | 6            | 183               | 0.00461858 | <i>DDB1, IRF7, HRAS, TRAF3, PIK3R3, MAVS</i>     |
| NOD-like receptor signaling pathway     | 6            | 187               | 0.00510821 | <i>IL18, NLRP6, IRF7, TRAF3, MAVS, P2RX7</i>     |
| Influenza A                             | 6            | 198               | 0.0066506  | <i>IL18, TRAF3, IRF7, PIK3R3, ACTB, MAVS</i>     |
| Longevity regulating pathway            | 4            | 90                | 0.00735024 | <i>CAMKK2, HRAS, PIK3R3, CAMK4</i>               |
| Progesterone-mediated oocyte maturation | 4            | 91                | 0.00762542 | <i>MOS, ANAPC2, PIK3R3, ANAPC4</i>               |
| Phospholipase D signaling pathway       | 5            | 148               | 0.00843512 | <i>PTGFR, DGKQ, PIK3R3, HRAS, KITLG</i>          |
| Rap1 signaling pathway                  | 6            | 215               | 0.00966168 | <i>HRAS, PARD6A, PIK3R3, KITLG, ACTB, FLT1</i>   |
| Choline metabolism in cancer            | 4            | 101               | 0.01075578 | <i>HRAS, DGKQ, PIK3R3, SLC44A5</i>               |
| Glycerophospholipid metabolism          | 4            | 102               | 0.01110801 | <i>PLA2G6, MBOAT2, PTDSS2, DGKQ</i>              |
| Glycerolipid metabolism                 | 3            | 63                | 0.01669877 | <i>MBOAT2, DGKQ, TKFC</i>                        |
| Viral carcinogenesis                    | 6            | 244               | 0.01685566 | <i>TRAF3, IRF7, HRAS, PIK3R3, ATP6V0D1, DDB1</i> |
| Epstein-Barr virus infection            | 6            | 245               | 0.01715522 | <i>TRAF3, IRF7, PSMD13, PIK3R3, MAVS, SIN3A</i>  |
| Hepatitis C                             | 5            | 178               | 0.0172026  | <i>PIK3R3, HRAS, MAVS, IRF7, TRAF3</i>           |

|                                           |   |     |            |                                                               |
|-------------------------------------------|---|-----|------------|---------------------------------------------------------------|
| RIG-I-like receptor signaling pathway     | 4 | 118 | 0.01777726 | <i>TRAF3, MAVS, IRF7, TKFC</i>                                |
| Oocyte meiosis                            | 4 | 121 | 0.01925289 | <i>MOS, PPP2R5E, ANAPC2, ANAPC4</i>                           |
| Central carbon metabolism in cancer       | 3 | 68  | 0.0202525  | <i>SIRT3, HRAS, PIK3R3</i>                                    |
| Neurotrophin signaling pathway            | 4 | 125 | 0.02133512 | <i>HRAS, PIK3R3, CAMK4, KIDINS220</i>                         |
| Cytosolic DNA-sensing pathway             | 3 | 74  | 0.02502338 | <i>IL18, MAVS, IRF7</i>                                       |
| Autophagy - animal                        | 4 | 133 | 0.02590012 | <i>CAMKK2, HRAS, PIK3R3, SH3GLB1</i>                          |
| Osteoclast differentiation                | 4 | 134 | 0.0265088  | <i>NCF1, PIK3R3, CAMK4, TREM2</i>                             |
| Glioma                                    | 3 | 76  | 0.02673646 | <i>HRAS, PIK3R3, CAMK4</i>                                    |
| Calcium signaling pathway                 | 5 | 203 | 0.02798658 | <i>P2RX4, PTGFR, CAMK4, P2RX7, ADRA1D</i>                     |
| B cell receptor signaling pathway         | 3 | 78  | 0.02851078 | <i>HRAS, DAPP1, PIK3R3</i>                                    |
| Fructose and mannose metabolism           | 2 | 35  | 0.03642411 | <i>GMDS, TKFC</i>                                             |
| Ubiquitin mediated proteolysis            | 4 | 149 | 0.03667167 | <i>DDB1, UBE2R2, ANAPC4, ANAPC2</i>                           |
| Human papillomavirus infection            | 7 | 376 | 0.03790055 | <i>TRAF3, HRAS, PARD6A, NOTCH3, PIK3R3, PPP2R5E, ATP6V0D1</i> |
| Oxytocin signaling pathway                | 4 | 154 | 0.04049353 | <i>CAMKK2, HRAS, CAMK4, ACTB</i>                              |
| Aldosterone-regulated sodium reabsorption | 2 | 38  | 0.04199087 | <i>HSD11B2, PIK3R3</i>                                        |
| Fc gamma R-mediated phagocytosis          | 3 | 94  | 0.04488055 | <i>PLA2G6, NCF1, PIK3R3</i>                                   |
| mTOR signaling pathway                    | 4 | 160 | 0.04536774 | <i>HRAS, PIK3R3, CLIP1, LAMTOR3</i>                           |
| Endocrine resistance                      | 3 | 96  | 0.0471933  | <i>HRAS, PIK3R3, NOTCH3</i>                                   |
| mRNA surveillance pathway                 | 3 | 99  | 0.05077046 | <i>CPSF7, PPP2R5E, PABPC5</i>                                 |
| Ras signaling pathway                     | 5 | 242 | 0.05196266 | <i>PLA2G6, HRAS, PIK3R3, KITLG, FLT1</i>                      |
| Measles                                   | 4 | 168 | 0.05235431 | <i>PIK3R3, MAVS, IRF7, TRAF3</i>                              |
| Rheumatoid arthritis                      | 3 | 101 | 0.05322645 | <i>IL18, ATP6V0D1, FLT1</i>                                   |
| Phosphatidylinositol signaling system     | 3 | 101 | 0.05322645 | <i>PI4K2B, DGKQ, PIK3R3</i>                                   |
| Melanogenesis                             | 3 | 103 | 0.05573872 | <i>HRAS, KITLG, ASIP</i>                                      |

|                                                 |   |     |            |                                   |
|-------------------------------------------------|---|-----|------------|-----------------------------------|
| Cholinergic synapse                             | 3 | 111 | 0.06633804 | <i>HRAS, PIK3R3, CAMK4</i>        |
| Leukocyte transendothelial migration            | 3 | 117 | 0.07484619 | <i>NCF1, PIK3R3, ACTB</i>         |
| Toll-like receptor signaling pathway            | 3 | 119 | 0.07778479 | <i>PIK3R3, TRAF3, IRF7</i>        |
| AMPK signaling pathway                          | 3 | 125 | 0.08689739 | <i>CAMKK2, PIK3R3, PPP2R5E</i>    |
| Endometrial cancer                              | 2 | 59  | 0.08829447 | <i>HRAS, PIK3R3</i>               |
| Lysosome                                        | 3 | 126 | 0.0884584  | <i>ABCB9, ATP6V0D1, SLC11A1</i>   |
| Sphingolipid signaling pathway                  | 3 | 126 | 0.0884584  | <i>PPP2R5E, HRAS, PIK3R3</i>      |
| VEGF signaling pathway                          | 2 | 60  | 0.0907666  | <i>HRAS, PIK3R3</i>               |
| Focal adhesion                                  | 4 | 208 | 0.09539122 | <i>HRAS, PIK3R3, ACTB, FLT1</i>   |
| Longevity regulating pathway - multiple species | 2 | 63  | 0.09830238 | <i>HRAS, PIK3R3</i>               |
| Non-small cell lung cancer                      | 2 | 66  | 0.10600717 | <i>HRAS, PIK3R3</i>               |
| Kaposi sarcoma-associated herpesvirus infection | 4 | 217 | 0.1068284  | <i>PIK3R3, HRAS, TRAF3, IRF7</i>  |
| Apelin signaling pathway                        | 3 | 138 | 0.1080807  | <i>HRAS, CAMK4, NOTCH3</i>        |
| Taurine and hypotaurine metabolism              | 1 | 13  | 0.10810641 | <i>GGT6</i>                       |
| Fc epsilon RI signaling pathway                 | 2 | 67  | 0.10861081 | <i>HRAS, PIK3R3</i>               |
| Acute myeloid leukemia                          | 2 | 67  | 0.10861081 | <i>HRAS, PIK3R3</i>               |
| Regulation of actin cytoskeleton                | 4 | 219 | 0.10945108 | <i>MOS, HRAS, PIK3R3, ACTB</i>    |
| Alcoholism                                      | 4 | 219 | 0.10945108 | <i>CAMKK2, HRAS, CAMK4, H2AFZ</i> |
| Yersinia infection                              | 3 | 141 | 0.11323028 | <i>IL18, ACTB, PIK3R3</i>         |
| Long-term potentiation                          | 2 | 69  | 0.11386846 | <i>HRAS, CAMK4</i>                |
| Melanoma                                        | 2 | 72  | 0.12187425 | <i>HRAS, PIK3R3</i>               |
| Renal cell carcinoma                            | 2 | 73  | 0.12457295 | <i>HRAS, PIK3R3</i>               |
| Adipocytokine signaling pathway                 | 2 | 73  | 0.12457295 | <i>CAMKK2, AGRP</i>               |
| Fluid shear stress and atherosclerosis          | 3 | 149 | 0.1274029  | <i>NCF1, PIK3R3, ACTB</i>         |



|                                                        |   |     |            |                                                  |
|--------------------------------------------------------|---|-----|------------|--------------------------------------------------|
| Bacterial invasion of epithelial cells                 | 2 | 77  | 0.13550725 | <i>ACTB, PIK3R3</i>                              |
| Apoptosis                                              | 3 | 154 | 0.13656686 | <i>HRAS, PIK3R3, ACTB</i>                        |
| Breast cancer                                          | 3 | 155 | 0.13842634 | <i>HRAS, PIK3R3, NOTCH3</i>                      |
| Chronic myeloid leukemia                               | 2 | 79  | 0.1410525  | <i>HRAS, PIK3R3</i>                              |
| Synaptic vesicle cycle                                 | 2 | 80  | 0.14384329 | <i>ATP6V0D1, CPLX1</i>                           |
| Human T-cell leukemia virus 1 infection                | 4 | 246 | 0.14753046 | <i>HRAS, ANAPC2, PIK3R3, ANAPC4</i>              |
| Pantothenate and CoA biosynthesis                      | 1 | 19  | 0.15079871 | <i>PANK2</i>                                     |
| EGFR tyrosine kinase inhibitor resistance              | 2 | 83  | 0.15228383 | <i>HRAS, PIK3R3</i>                              |
| RNA degradation                                        | 2 | 83  | 0.15228383 | <i>PAN3, PABPC5</i>                              |
| Salmonella infection                                   | 2 | 88  | 0.16655695 | <i>IL18, ACTB</i>                                |
| ErbB signaling pathway                                 | 2 | 89  | 0.16943927 | <i>HRAS, PIK3R3</i>                              |
| Other glycan degradation                               | 1 | 22  | 0.17137573 | <i>MAN2C1</i>                                    |
| Ribosome biogenesis in eukaryotes                      | 2 | 90  | 0.17233004 | <i>IMP3, WDR36</i>                               |
| Prolactin signaling pathway                            | 2 | 90  | 0.17233004 | <i>HRAS, PIK3R3</i>                              |
| Herpes simplex virus 1 infection                       | 6 | 457 | 0.17731106 | <i>ZNF746, TRAF3, IRF7, PIK3R3, ZNF777, MAVS</i> |
| Mannose type O-glycan biosynthesis                     | 1 | 23  | 0.17812384 | <i>POMGNT1</i>                                   |
| Colorectal cancer                                      | 2 | 92  | 0.17813564 | <i>HRAS, PIK3R3</i>                              |
| PD-L1 expression and PD-1 checkpoint pathway in cancer | 2 | 92  | 0.17813564 | <i>HRAS, PIK3R3</i>                              |
| RNA transport                                          | 3 | 178 | 0.1833528  | <i>SNUPN, SENP2, PABPC5</i>                      |
| Endocytosis                                            | 4 | 269 | 0.18342252 | <i>HRAS, VPS37B, PARD6A, SH3GLB1</i>             |
| Phagosome                                              | 3 | 180 | 0.18743102 | <i>NCF1, ATP6V0D1, ACTB</i>                      |
| Prostate cancer                                        | 2 | 97  | 0.19277525 | <i>HRAS, PIK3R3</i>                              |
| Neuroactive ligand-receptor                            | 5 | 372 | 0.19440404 | <i>PTGFR, TAC3, ADRA1D, P2RX7, P2RX4</i>         |

|                                                      |    |      |            |                                                                                                                             |  |
|------------------------------------------------------|----|------|------------|-----------------------------------------------------------------------------------------------------------------------------|--|
| interaction                                          |    |      |            |                                                                                                                             |  |
| Hepatocellular carcinoma                             | 3  | 184  | 0.19565718 | <i>HRAS, PIK3R3, ACTB</i>                                                                                                   |  |
| Metabolic pathways                                   | 16 | 1540 | 0.20044239 | <i>B4GALNT4, PTDSS2, PANK2, SMOX, POMGNT1, HSD11B2, DGKQ, PI4K2B, PLA2G6, MBOAT2, GMDS, GGT6, TKFC, HAO1, ATP6V0D1, PTS</i> |  |
| Small cell lung cancer                               | 2  | 100  | 0.20163305 | <i>TRAF3, PIK3R3</i>                                                                                                        |  |
| Chemokine signaling pathway                          | 3  | 188  | 0.20397066 | <i>NCF1, PIK3R3, HRAS</i>                                                                                                   |  |
| Transcriptional misregulation in cancer              | 3  | 189  | 0.20606188 | <i>SIN3A, HMGA2, FLT1</i>                                                                                                   |  |
| Axon guidance                                        | 3  | 191  | 0.21025901 | <i>HRAS, PIK3R3, PARD6A</i>                                                                                                 |  |
| Collecting duct acid secretion                       | 1  | 28   | 0.21105258 | <i>ATP6V0D1</i>                                                                                                             |  |
| alpha-Linolenic acid metabolism                      | 1  | 28   | 0.21105258 | <i>PLA2G6</i>                                                                                                               |  |
| Inflammatory mediator regulation of TRP channels     | 2  | 106  | 0.21947937 | <i>PLA2G6, PIK3R3</i>                                                                                                       |  |
| Folate biosynthesis                                  | 1  | 30   | 0.22385333 | <i>PTS</i>                                                                                                                  |  |
| MicroRNAs in cancer                                  | 3  | 198  | 0.22509247 | <i>HRAS, HMGA2, NOTCH3</i>                                                                                                  |  |
| PI3K-Akt signaling pathway                           | 5  | 398  | 0.23206245 | <i>PPP2R5E, HRAS, PIK3R3, KITLG, FLT1</i>                                                                                   |  |
| AGE-RAGE signaling pathway in diabetic complications | 2  | 111  | 0.23445038 | <i>HRAS, PIK3R3</i>                                                                                                         |  |
| T cell receptor signaling pathway                    | 2  | 112  | 0.23745238 | <i>HRAS, PIK3R3</i>                                                                                                         |  |
| C-type lectin receptor signaling pathway             | 2  | 112  | 0.23745238 | <i>HRAS, PIK3R3</i>                                                                                                         |  |
| HIF-1 signaling pathway                              | 2  | 113  | 0.24045644 | <i>PIK3R3, FLT1</i>                                                                                                         |  |
| Base excision repair                                 | 1  | 33   | 0.24266783 | <i>NEIL1</i>                                                                                                                |  |
| MAPK signaling pathway                               | 4  | 305  | 0.24442798 | <i>HRAS, LAMTOR3, KITLG, FLT1</i>                                                                                           |  |
| Glyoxylate and dicarboxylate                         | 1  | 35   | 0.25495791 | <i>HAO1</i>                                                                                                                 |  |

|                                           |   |     |            |                                                 |
|-------------------------------------------|---|-----|------------|-------------------------------------------------|
| metabolism                                |   |     |            |                                                 |
| SNARE interactions in vesicular transport | 1 | 35  | 0.25495791 | <i>BETIL</i>                                    |
| Tuberculosis                              | 3 | 212 | 0.25531633 | <i>IL18, ATP6V0D1, NFYA</i>                     |
| Linoleic acid metabolism                  | 1 | 36  | 0.26102829 | <i>PLA2G6</i>                                   |
| Proteoglycans in cancer                   | 3 | 215 | 0.26186973 | <i>HRAS, PIK3R3, ACTB</i>                       |
| beta-Alanine metabolism                   | 1 | 38  | 0.27302175 | <i>SMOX</i>                                     |
| African trypanosomiasis                   | 1 | 39  | 0.27894562 | <i>IL18</i>                                     |
| Platelet activation                       | 2 | 127 | 0.282605   | <i>ACTB, PIK3R3</i>                             |
| Carbon metabolism                         | 2 | 127 | 0.282605   | <i>HAO1, TKFC</i>                               |
| Bladder cancer                            | 1 | 40  | 0.28482144 | <i>HRAS</i>                                     |
| TNF signaling pathway                     | 2 | 128 | 0.28561397 | <i>TRAF3, PIK3R3</i>                            |
| Cell cycle                                | 2 | 129 | 0.28862169 | <i>ANAPC2, ANAPC4</i>                           |
| Thyroid cancer                            | 1 | 41  | 0.29064959 | <i>HRAS</i>                                     |
| Pathways in cancer                        | 6 | 551 | 0.30137468 | <i>TRAF3, HRAS, NOTCH3, GLI3, PIK3R3, KITLG</i> |
| Carbohydrate digestion and absorption     | 1 | 43  | 0.30216444 | <i>PIK3R3</i>                                   |
| Homologous recombination                  | 1 | 43  | 0.30216444 | <i>BRIP1</i>                                    |
| Vascular smooth muscle contraction        | 2 | 134 | 0.30363557 | <i>PLA2G6, ADRA1D</i>                           |
| Relaxin signaling pathway                 | 2 | 135 | 0.30663221 | <i>HRAS, PIK3R3</i>                             |
| Proteasome                                | 1 | 45  | 0.31349322 | <i>PSMD13</i>                                   |
| Estrogen signaling pathway                | 2 | 138 | 0.31560693 | <i>HRAS, PIK3R3</i>                             |
| FoxO signaling pathway                    | 2 | 138 | 0.31560693 | <i>HRAS, PIK3R3</i>                             |
| Nucleotide excision repair                | 1 | 46  | 0.31908876 | <i>DDB1</i>                                     |
| cAMP signaling pathway                    | 3 | 242 | 0.32153683 | <i>GLI3, PIK3R3, CAMK4</i>                      |
| Type II diabetes mellitus                 | 1 | 47  | 0.32463891 | <i>PIK3R3</i>                                   |

|                                                          |   |     |            |                           |
|----------------------------------------------------------|---|-----|------------|---------------------------|
| Arginine and proline metabolism                          | 1 | 48  | 0.33014402 | <i>SMOX</i>               |
| Basal transcription factors                              | 1 | 48  | 0.33014402 | <i>GTF2I</i>              |
| Signaling pathways regulating pluripotency of stem cells | 2 | 143 | 0.33050496 | <i>HRAS, PIK3R3</i>       |
| Hedgehog signaling pathway                               | 1 | 49  | 0.33560446 | <i>GLI3</i>               |
| Human immunodeficiency virus 1 infection                 | 3 | 249 | 0.33708644 | <i>HRAS, DDB1, PIK3R3</i> |
| Insulin signaling pathway                                | 2 | 146 | 0.33940149 | <i>HRAS, PIK3R3</i>       |
| Natural killer cell mediated cytotoxicity                | 2 | 147 | 0.34235913 | <i>HRAS, PIK3R3</i>       |
| Notch signaling pathway                                  | 1 | 51  | 0.34639278 | <i>NOTCH3</i>             |
| Ether lipid metabolism                                   | 1 | 51  | 0.34639278 | <i>PLA2G6</i>             |
| Fanconi anemia pathway                                   | 1 | 52  | 0.35172136 | <i>BRIP1</i>              |
| Amino sugar and nucleotide sugar metabolism              | 1 | 54  | 0.36224915 | <i>GMDS</i>               |
| Adrenergic signaling in cardiomyocytes                   | 2 | 154 | 0.3629392  | <i>PPP2R5E, ADRA1D</i>    |
| Malaria                                                  | 1 | 56  | 0.37260674 | <i>IL18</i>               |
| Regulation of lipolysis in adipocytes                    | 1 | 56  | 0.37260674 | <i>PIK3R3</i>             |
| Hippo signaling pathway                                  | 2 | 158 | 0.3745918  | <i>ACTB, PARD6A</i>       |
| Long-term depression                                     | 1 | 58  | 0.38279688 | <i>HRAS</i>               |
| Gastric cancer                                           | 2 | 163 | 0.38903446 | <i>HRAS, PIK3R3</i>       |
| Cellular senescence                                      | 2 | 169 | 0.40616881 | <i>HRAS, PIK3R3</i>       |
| cGMP-PKG signaling pathway                               | 2 | 171 | 0.4118294  | <i>GTF2I, ADRA1D</i>      |
| Glutathione metabolism                                   | 1 | 64  | 0.41238928 | <i>GGT6</i>               |
| Basal cell carcinoma                                     | 1 | 66  | 0.42193611 | <i>GLI3</i>               |

|                                                               |   |     |            |                     |
|---------------------------------------------------------------|---|-----|------------|---------------------|
| Mitophagy - animal                                            | 1 | 67  | 0.42665147 | <i>HRAS</i>         |
| Legionellosis                                                 | 1 | 68  | 0.43132854 | <i>IL18</i>         |
| Amphetamine addiction                                         | 1 | 68  | 0.43132854 | <i>CAMK4</i>        |
| Steroid hormone biosynthesis                                  | 1 | 69  | 0.43596763 | <i>HSD11B2</i>      |
| Tight junction                                                | 2 | 181 | 0.43972199 | <i>ACTB, PARD6A</i> |
| Adherens junction                                             | 1 | 72  | 0.44966008 | <i>ACTB</i>         |
| Retinol metabolism                                            | 1 | 74  | 0.45860404 | <i>SDR16C5</i>      |
| Arachidonic acid metabolism                                   | 1 | 75  | 0.46302162 | <i>PLA2G6</i>       |
| Pancreatic cancer                                             | 1 | 75  | 0.46302162 | <i>PIK3R3</i>       |
| Inflammatory bowel disease (IBD)                              | 1 | 75  | 0.46302162 | <i>IL18</i>         |
| Inositol phosphate metabolism                                 | 1 | 76  | 0.46740331 | <i>PI4K2B</i>       |
| ABC transporters                                              | 1 | 76  | 0.46740331 | <i>ABCB9</i>        |
| Arrhythmogenic right ventricular cardiomyopathy (ARVC)        | 1 | 76  | 0.46740331 | <i>ACTB</i>         |
| Leishmaniasis                                                 | 1 | 77  | 0.47174941 | <i>NCF1</i>         |
| Viral myocarditis                                             | 1 | 81  | 0.48878362 | <i>ACTB</i>         |
| Peroxisome                                                    | 1 | 85  | 0.50527097 | <i>HAO1</i>         |
| Platinum drug resistance                                      | 1 | 88  | 0.51728815 | <i>PIK3R3</i>       |
| Huntington disease                                            | 2 | 212 | 0.52128644 | <i>RCOR1, SIN3A</i> |
| Gap junction                                                  | 1 | 91  | 0.52901473 | <i>HRAS</i>         |
| Hypertrophic cardiomyopathy (HCM)                             | 1 | 92  | 0.53286023 | <i>ACTB</i>         |
| IL-17 signaling pathway                                       | 1 | 92  | 0.53286023 | <i>TRAF3</i>        |
| GnRH signaling pathway                                        | 1 | 93  | 0.53667447 | <i>HRAS</i>         |
| Viral protein interaction with cytokine and cytokine receptor | 1 | 94  | 0.54045771 | <i>IL18</i>         |
| Dilated cardiomyopathy (DCM)                                  | 1 | 95  | 0.5442102  | <i>ACTB</i>         |

|                                           |   |     |            |                       |
|-------------------------------------------|---|-----|------------|-----------------------|
| Antigen processing and presentation       | 1 | 96  | 0.54793219 | <i>NFYA</i>           |
| Amoebiasis                                | 1 | 96  | 0.54793219 | <i>PIK3R3</i>         |
| Aldosterone synthesis and secretion       | 1 | 99  | 0.5589176  | <i>CAMK4</i>          |
| Salivary secretion                        | 1 | 100 | 0.56252002 | <i>ADRA1D</i>         |
| Jak-STAT signaling pathway                | 2 | 234 | 0.57418367 | <i>HRAS, PIK3R3</i>   |
| NF-kappa B signaling pathway              | 1 | 104 | 0.57663921 | <i>TRAF3</i>          |
| Th1 and Th2 cell differentiation          | 1 | 104 | 0.57663921 | <i>NOTCH3</i>         |
| Insulin resistance                        | 1 | 111 | 0.60026492 | <i>PIK3R3</i>         |
| Serotonergic synapse                      | 1 | 113 | 0.60677075 | <i>HRAS</i>           |
| Thermogenesis                             | 2 | 251 | 0.61207369 | <i>HRAS, ACTB</i>     |
| Hematopoietic cell lineage                | 1 | 117 | 0.6194679  | <i>KITLG</i>          |
| Human cytomegalovirus infection           | 2 | 255 | 0.62060814 | <i>HRAS, PIK3R3</i>   |
| Chagas disease (American trypanosomiasis) | 1 | 118 | 0.6225779  | <i>PIK3R3</i>         |
| Ribosome                                  | 2 | 258 | 0.626914   | <i>MRPS6, RPS20</i>   |
| Th17 cell differentiation                 | 1 | 120 | 0.62872219 | <i>IRF4</i>           |
| Dopaminergic synapse                      | 1 | 132 | 0.66355217 | <i>PPP2R5E</i>        |
| Oxidative phosphorylation                 | 1 | 151 | 0.71216662 | <i>ATP6V0D1</i>       |
| Spliceosome                               | 1 | 155 | 0.72147369 | <i>PPIL1</i>          |
| Non-alcoholic fatty liver disease (NAFLD) | 1 | 164 | 0.74133376 | <i>PIK3R3</i>         |
| Wnt signaling pathway                     | 1 | 168 | 0.74970175 | <i>SENP2</i>          |
| Systemic lupus erythematosus              | 1 | 175 | 0.76370244 | <i>H2AFZ</i>          |
| Necroptosis                               | 1 | 190 | 0.79113357 | <i>H2AFZ</i>          |
| Cytokine-cytokine receptor interaction    | 2 | 358 | 0.79329466 | <i>IL18, TNFRSF6B</i> |

---

**Supplementary Table S8** Human Phenotype Ontology (HPO) analysis of candidate genes during domestication.

| Term                                  | Id         | P-value | Gene name                                                                                                                                                                                                                                                                                                             |
|---------------------------------------|------------|---------|-----------------------------------------------------------------------------------------------------------------------------------------------------------------------------------------------------------------------------------------------------------------------------------------------------------------------|
| Iris coloboma                         | HP:0000612 | 0.00000 | <i>ACTB, CPLX1, CRYBB2, HRAS, LETM1, NOTCH3, POMGNT1, SIN3A, TMEM138, TMEM216</i>                                                                                                                                                                                                                                     |
| Abnormality iris morphology           | HP:0000525 | 0.00000 | <i>ACTB, BRIP1, CPLX1, CRYBB2, FOXC1, GTF2I, HRAS, KITLG, LETM1, NOTCH3, POMGNT1, SIN3A, TMEM138, TMEM216, TRIP13</i>                                                                                                                                                                                                 |
| Coloboma                              | HP:0000589 | 0.00600 | <i>ACTB, CPLX1, CRYBB2, HRAS, LETM1, NOTCH3, POMGNT1, SIN3A, TMEM138, TMEM216</i>                                                                                                                                                                                                                                     |
| Ocular anterior segment dysgenesis    | HP:0007700 | 0.01700 | <i>BRIP1, CPLX1, CRYBB2, CRYBB3, FOXC1, GLIS3, GTF2I, LETM1, POMGNT1, TMEM216, TRIP13</i>                                                                                                                                                                                                                             |
| Abnormality of the eye                | HP:0000478 | 0.02000 | <i>ACD, ACTB, BBS9, BRIP1, CLIP1, CPLX1, CRADD, CRYBB2, CRYBB3, CTCF, CUX1, DNAAF5, EXOC6B, FAM20C, FLT1, FOXC1, GLI3, GLIS3, GTF2I, HRAS, HSD11B2, IFITM5, IFT81, KIDINS220, KITLG, LETM1, NCF1, NOTCH3, PANK2, PLA2G6, POMGNT1, PTS, RTEL1, SIN3A, SLC25A46, TAC3, TKFC, TMEM138, TMEM216, TREM2, TRIP13, WDR36</i> |
| Aplasia/Hypoplasia affecting the eye  | HP:0008056 | 0.02000 | <i>ACTB, BRIP1, CPLX1, FOXC1, GLI3, GTF2I, HRAS, LETM1, POMGNT1, SIN3A, TKFC, TMEM216, TRIP13</i>                                                                                                                                                                                                                     |
| Aplasia/Hypoplasia affecting the uvea | HP:0008055 | 0.03300 | <i>BRIP1, CPLX1, FOXC1, GTF2I, LETM1, TMEM216, TRIP13</i>                                                                                                                                                                                                                                                             |
| Abnormal uvea morphology              | HP:0000553 | 0.00800 | <i>ACTB, BRIP1, CPLX1, CRYBB2, FOXC1, GTF2I, HRAS, KITLG, LETM1, NOTCH3, POMGNT1, SIN3A, TMEM138, TMEM216, TRIP13</i>                                                                                                                                                                                                 |
| Aplasia/Hypoplasia of the iris        | HP:0008053 | 0.03300 | <i>BRIP1, CPLX1, FOXC1, GTF2I, LETM1, TMEM216, TRIP13</i>                                                                                                                                                                                                                                                             |
| Posteriorly rotated ears              | HP:0000358 | 0.03800 | <i>BBS9, CTCF, FAM20C, GLI3, GTF2I, HRAS, LETM1, NOTCH3, POMGNT1, TMEM138, TMEM216, TRIP13</i>                                                                                                                                                                                                                        |

|                                        |            |         |                                                                                                                                                                                                                           |
|----------------------------------------|------------|---------|---------------------------------------------------------------------------------------------------------------------------------------------------------------------------------------------------------------------------|
| Ventriculomegaly                       | HP:0002119 | 0.00200 | <i>ACD, ACTB, BRIP1, CPLX1, CTCF, CUX1, DNAAF5, GLI3, HRAS, KIDINS220, LETM1, POMGNT1, RTEL1, SIN3A, TMEM138, TMEM216, TREM2, TRIP13</i>                                                                                  |
| Abnormality of body weight             | HP:0004323 | 0.01600 | <i>ACD, ACTB, AGRP, BBS9, BRIP1, CPLX1, CTCF, EXOC6B, FLT1, GLI3, GTF2I, HRAS, HSD11B2, IGF2BP2, KIDINS220, LETM1, NKX2-1, PANK2, PLA2G6, PLAG1, POMGNT1, PTS, RTEL1, SIN3A, SLC11A1, TAC3, TKFC, TMEM216, TRIP13</i>     |
| Abnormality of the cerebral ventricles | HP:0002118 | 0.01800 | <i>ACD, ACTB, BRIP1, CPLX1, CTCF, CUX1, DNAAF5, FAM20C, GLI3, HRAS, KIDINS220, LETM1, POMGNT1, RTEL1, SIN3A, TMEM138, TMEM216, TREM2, TRIP13</i>                                                                          |
| Spina bifida                           | HP:0002414 | 0.02600 | <i>ACTB, BRIP1, GLI3, GTF2I, NOTCH3, POMGNT1, SIN3A, TMEM216</i>                                                                                                                                                          |
| Abnormality of the calvaria            | HP:0002683 | 0.03100 | <i>ACTB, BRIP1, CPLX1, CTCF, EXOC6B, FAM20C, GLI3, GLIS3, HRAS, IFITM5, IFT81, KIDINS220, LETM1, NKX2-1, NOTCH3, PLA2G6, PLAG1, TMEM138, TMEM216, TRIP13</i>                                                              |
| Global developmental delay             | HP:0001263 | 0.03800 | <i>ACD, ACTB, BRIP1, CLIP1, CPLX1, CRADD, CTCF, CUX1, EXOC6B, FAM20C, GLI3, GLIS3, HRAS, KIDINS220, LETM1, NKX2-1, NOTCH3, PANK2, PLA2G6, PLAG1, POMGNT1, PTS, RTEL1, SIN3A, SLC25A46, TKFC, TMEM138, TMEM216, TRIP13</i> |
| Meningocele                            | HP:0002435 | 0.04500 | <i>GLI3, NOTCH3, POMGNT1, SIN3A, TMEM216</i>                                                                                                                                                                              |
| Spinal dysraphism                      | HP:0010301 | 0.04800 | <i>ACTB, BRIP1, GLI3, GTF2I, NOTCH3, POMGNT1, SIN3A, TMEM216</i>                                                                                                                                                          |

**Supplementary Table S9** Putatively selected regions in Asiatic mouflon-to-indigenous breed comparison.

| No. | Combined region (Mb) | Chromosome | Position |          | Gene name                |
|-----|----------------------|------------|----------|----------|--------------------------|
|     |                      |            | Start    | End      |                          |
| 1   | Chr1: 27.75-27.9     | 1          | 27750001 | 27900000 | <i>GLIS1, GLIS1-NDC1</i> |



|    |                       |   |           |          |                                                                                                                                     |
|----|-----------------------|---|-----------|----------|-------------------------------------------------------------------------------------------------------------------------------------|
| 2  | Chr1: 54.3-54.525     | 1 | 54300001  | 54450000 | <i>PTGFR, LOC105613526, LOC105613526-LOC101103103, LOC101110201, LOC101110201-IFI44L, IFI44L, IFI44, IFI44L-IFI44, IFI44-ADGRL4</i> |
|    |                       | 1 | 54375001  | 54525000 | <i>IFI44L, IFI44L-IFI44, IFI44, IFI44-ADGRL4</i>                                                                                    |
| 3  | Chr1: 119.4-119.55    | 1 | 119400001 | 1.2E+08  | <i>KCNE2-MRPS6, MRPS6, SLC5A3, MRPS6-ATP5O,</i>                                                                                     |
| 4  | Chr2: 71.175-71.325   | 2 | 71175001  | 71325000 | <i>RFX3</i>                                                                                                                         |
|    |                       | 2 | 114975001 | 1.15E+08 | <i>LOC101106660-LOC101117569</i>                                                                                                    |
|    |                       | 2 | 115050001 | 1.15E+08 | <i>LOC101106660-LOC101117569</i>                                                                                                    |
|    |                       | 2 | 115125001 | 1.15E+08 | <i>LOC101106660-LOC101117569, LOC101117569</i>                                                                                      |
| 5  | Chr2: 114.975-115.425 | 2 | 115200001 | 1.15E+08 | <i>LOC101106660-LOC101117569, LOC101117569, LOC101117569-LOC105608719</i>                                                           |
|    |                       | 2 | 115275001 | 1.15E+08 | <i>LOC101117569, LOC101117569-LOC105608719, LOC105608719</i>                                                                        |
| 6  | Chr2: 122.325-122.775 | 2 | 122325001 | 1.22E+08 | <i>LOC101120641-LOC101122056, LOC101122056, LOC101122056-FSIP2, FSIP2</i>                                                           |
|    |                       | 2 | 122625001 | 1.23E+08 | <i>LOC105608888, LOC105608888-LOC101121406</i>                                                                                      |
| 7  | Chr2: 123-123.15      | 2 | 123000001 | 1.23E+08 | <i>LOC105608888-LOC101121406</i>                                                                                                    |
| 8  | Chr2: 209.55-209.7    | 2 | 209550001 | 2.1E+08  | <i>PTH2R-LOC101107339</i>                                                                                                           |
| 9  | Chr2: 213.75-213.9    | 2 | 213750001 | 2.14E+08 | <i>LOC105611887-LOC105610530, LOC105610530, LOC105610530-IKZF2,</i>                                                                 |
| 10 | Chr2: 214.275-214.425 | 2 | 214275001 | 2.14E+08 | <i>SPAG16</i>                                                                                                                       |
|    |                       | 2 | 219375001 | 2.2E+08  | <i>SLC11A1, SLC11A1-CTDSP1, CTDSP1, CTDSP1-VIL1, VIL1, USP37, USP37-RQCD1, RQCD1</i>                                                |
| 11 | Chr2: 219.375-219.6   | 2 | 219450001 | 2.2E+08  | <i>USP37, USP37-RQCD1, RQCD1, RQCD1-PLCD4, PLCD4, PLCD4-ZNF142, ZNF142</i>                                                          |

|    |                       |   |           |          |                                                                                                                                                                                                                                                                                                                                       |
|----|-----------------------|---|-----------|----------|---------------------------------------------------------------------------------------------------------------------------------------------------------------------------------------------------------------------------------------------------------------------------------------------------------------------------------------|
|    |                       |   |           |          | <i>LCK, FAM167B, FAM167B-LOC101115435,<br/>LOC101115435, EIF3I, TMEM234, DCDC2B,<br/>LOC106990972, IQCC, DCDC2B-IQCC, DCDC2B-TXLNA,<br/>TXLNA, TXLNA-KPNA6, KPNA6, KPNA6-TMEM39B,<br/>TMEM39B</i>                                                                                                                                     |
| 12 | Chr2: 234.375-234.6   | 2 | 234375001 | 2.35E+08 |                                                                                                                                                                                                                                                                                                                                       |
|    |                       | 2 | 234450001 | 2.35E+08 | <i>KPNA6, KPNA6-TMEM39B, TMEM39B,<br/>TMEM39B-KHDRBS1, KHDRBS1, KHDRBS1-PTP4A2<br/>MBOAT2, MBOAT2-LOC101102303, LOC101102303,<br/>LOC101102303-ASAP2</i>                                                                                                                                                                              |
| 13 | Chr3: 18.15-18.3      | 3 | 18150001  | 18300000 | <i>EXOC6B, LOC106991063</i>                                                                                                                                                                                                                                                                                                           |
| 14 | Chr3: 94.425-94.65    | 3 | 94425001  | 94575000 | <i>EXOC6B, LOC105614905, EXOC6B-SPR</i>                                                                                                                                                                                                                                                                                               |
|    |                       | 3 | 94500001  | 94650000 |                                                                                                                                                                                                                                                                                                                                       |
| 15 | Chr3: 97.725-97.95    | 3 | 97725001  | 97875000 | <i>LOC105612338-TMEM182</i>                                                                                                                                                                                                                                                                                                           |
|    |                       | 3 | 97800001  | 97950000 | <i>LOC105612338-TMEM182</i>                                                                                                                                                                                                                                                                                                           |
| 16 | Chr3: 111.3-111.45    | 3 | 111300001 | 1.11E+08 | <i>LOC105611140-LOC105611141</i>                                                                                                                                                                                                                                                                                                      |
|    |                       | 3 | 124425001 | 1.25E+08 | <i>TMTC3-KITLG, KITLG</i>                                                                                                                                                                                                                                                                                                             |
|    |                       | 3 | 124575001 | 1.25E+08 | <i>KITLG, KITLG-TRNAG-CCC-31</i>                                                                                                                                                                                                                                                                                                      |
| 17 | Chr3: 124.425-124.875 | 3 | 124650001 | 1.25E+08 | <i>KITLG-TRNAG-CCC-31, TRNAG-CCC-31,<br/>TRNAG-CCC-31-LOC101105320</i>                                                                                                                                                                                                                                                                |
|    |                       | 3 | 124725001 | 1.25E+08 | <i>TRNAG-CCC-31, TRNAG-CCC-31-LOC101105320<br/>TUBA8-CDC42EP1, CDC42EP1, CDC42EP1-LGALS2,<br/>LGALS2, LGALS2-LOC105609489, LOC105609489,<br/>GGA1-LOC105609489, LOC105609489, GGA1,<br/>GGA1-LOC105609488, LOC105609488, SH3BP1, PDXP,<br/>PDXP-LGALS1, LGALS1, LGALS1-NOL12, NOL12,<br/>LOC105609492, TRNAG-CCC-36, LOC101119130</i> |
| 18 | Chr3: 213.15-213.375  | 3 | 213150001 | 2.13E+08 |                                                                                                                                                                                                                                                                                                                                       |

|    |                       |   |           |          |                                                                                                                                                                                                                                                                                                                                                                                                                                                                                                                                                                                   |
|----|-----------------------|---|-----------|----------|-----------------------------------------------------------------------------------------------------------------------------------------------------------------------------------------------------------------------------------------------------------------------------------------------------------------------------------------------------------------------------------------------------------------------------------------------------------------------------------------------------------------------------------------------------------------------------------|
|    |                       | 3 | 213225001 | 2.13E+08 | <i>LOC105609488, SH3BP1, PDXP, PDXP-LGALS1, LGALS1, LGALS1-NOL12, NOL12, LOC105609492, TRNAG-CCC-36, LOC101119130, LOC101119130-LOC101102223, LOC101102223, GCAT, GCAT-GALR3, GALR3</i>                                                                                                                                                                                                                                                                                                                                                                                           |
| 19 | Chr4: 23.7-23.85      | 4 | 23700001  | 23850000 | <i>AGMO</i>                                                                                                                                                                                                                                                                                                                                                                                                                                                                                                                                                                       |
| 20 | Chr4: 47.475-47.625   | 4 | 47475001  | 47625000 | <i>NAMPT-LOC101102639</i>                                                                                                                                                                                                                                                                                                                                                                                                                                                                                                                                                         |
| 21 | Chr4: 63-63.15        | 4 | 63000001  | 63150000 | <i>BMPER-LOC105612117, LOC105612117, LOC105612117-BBS9</i>                                                                                                                                                                                                                                                                                                                                                                                                                                                                                                                        |
| 22 | Chr4: 78.825-78.975   | 4 | 78825001  | 78975000 | <i>GLI3</i>                                                                                                                                                                                                                                                                                                                                                                                                                                                                                                                                                                       |
|    |                       | 4 | 101625001 | 1.02E+08 | <i>AKR1D1-TRIM24</i>                                                                                                                                                                                                                                                                                                                                                                                                                                                                                                                                                              |
| 23 | Chr4: 101.625-101.925 | 4 | 101700001 | 1.02E+08 | <i>AKR1D1-TRIM24</i>                                                                                                                                                                                                                                                                                                                                                                                                                                                                                                                                                              |
|    |                       | 4 | 101775001 | 1.02E+08 | <i>AKR1D1-TRIM24, TRIM24</i>                                                                                                                                                                                                                                                                                                                                                                                                                                                                                                                                                      |
|    |                       |   |           |          | <i>TRNAC-GCA-108-TRNAC-GCA-109, TRNAC-GCA-109, TRNAC-GCA-109-TRNAC-GCA-110, TRNAC-GCA-110, TRNAC-GCA-110-LOC106991146, LOC106991146, LOC106991146-ZNF777, ZNF777, ZNF777-ZNF746, ZNF746, ZNF746-TRNAC-GCA-111, TRNAC-GCA-111, TRNAC-GCA-111-TRNAC-GCA-112, TRNAC-GCA-112, TRNAC-GCA-112-TRNAC-GCA-113, TRNAC-GCA-113, TRNAC-GCA-113-TRNAC-GCA-114, TRNAC-GCA-114, TRNAC-GCA-114-TRNAC-GCA-115, TRNAC-GCA-115, TRNAC-GCA-115-TRNAC-GCA-116, TRNAC-GCA-116, TRNAC-GCA-116-TRNAC-GCA-117, TRNAC-GCA-117, TRNAC-GCA-117-TRNAC-GCA-118, TRNAC-GCA-118, TRNAC-GCA-118-TRNAC-GCA-119</i> |
| 24 | Chr4: 111.75-111.9    | 4 | 111750001 | 1.12E+08 |                                                                                                                                                                                                                                                                                                                                                                                                                                                                                                                                                                                   |

|    |                     |  |   |           |          |                                                                                                                                                                                           |
|----|---------------------|--|---|-----------|----------|-------------------------------------------------------------------------------------------------------------------------------------------------------------------------------------------|
|    |                     |  | 5 | 7500001   | 7650000  | <i>AKAP8L, AKAP8-LOC101123297, LOC101123297, LOC105615346-LOC101123297, LOC105615346, EPHX3, EPHX3-NOTCH3</i>                                                                             |
| 25 | Chr5: 7.5-7.725     |  | 5 | 7575001   | 7725000  | <i>AKAP8-LOC101123297, LOC101123297, LOC105615346-LOC101123297, LOC105615346, EPHX3, EPHX3-NOTCH3, NOTCH3, NOTCH3-LOC101120324, LOC101120324, LOC101120324-LOC101101981, LOC101101981</i> |
|    |                     |  | 5 | 106875001 | 1.07E+08 | <i>SLC25A46, SLC25A46-LOC105615337</i>                                                                                                                                                    |
| 26 | Chr5: 106.875-107.1 |  | 5 | 106950001 | 1.07E+08 | <i>SLC25A46-LOC105615337, LOC105615337, LOC105615337-WDR36</i>                                                                                                                            |
| 27 | Chr6: 19.875-20.025 |  | 6 | 19875001  | 20025000 | <i>PPA2, LOC105611776, PPA2-TET2, TET2</i>                                                                                                                                                |
|    |                     |  | 6 | 24600001  | 24750000 | <i>TRNAC-GCA-141-LOC106990491, LOC106990491, LOC106990491-H2AFZ</i>                                                                                                                       |
|    |                     |  | 6 | 24675001  | 24825000 | <i>TRNAC-GCA-141-LOC106990491, LOC106990491, LOC106990491-H2AFZ, H2AFZ, DNAJB14, DNAJB14-LAMTOR3, LAMTOR3, LAMTOR3-DAPP1, DAPP1</i>                                                       |
| 28 | Chr6: 24.6-24.9     |  | 6 | 24750001  | 24900000 | <i>LOC106990491-H2AFZ, H2AFZ, DNAJB14-H2AFZ, DNAJB14, DNAJB14-LAMTOR3, LAMTOR3, LAMTOR3-DAPP1, DAPP1, DAPP1-LOC105612764</i>                                                              |
|    |                     |  | 6 | 30900001  | 31050000 | <i>GRID2</i>                                                                                                                                                                              |
| 29 | Chr6: 30.9-31.125   |  | 6 | 30975001  | 31125000 | <i>GRID2</i>                                                                                                                                                                              |
| 30 | Chr6: 36.15-36.3    |  | 6 | 36150001  | 36300000 | <i>HERC5, HERC5-HERC6, HERC6, HERC6-PPMIK</i>                                                                                                                                             |
| 31 | Chr6: 37.275-37.425 |  | 6 | 37275001  | 37425000 | <i>LCORL, LOC105615456</i>                                                                                                                                                                |

|    |                       |   |           |          |                                                                                                                                             |
|----|-----------------------|---|-----------|----------|---------------------------------------------------------------------------------------------------------------------------------------------|
| 32 | Chr6: 44.625-44.775   | 6 | 44625001  | 44775000 | <i>PI4K2B, PI4K2B-ZCCHC4, ZCCHC4, ZCCHC4-ANAPC4, ANAPC4, ANAPC4-SLC34A2</i>                                                                 |
| 33 | Chr6: 53.55-53.775    | 6 | 53550001  | 53700000 | <i>LOC101109539-TRNAC-GCA-144</i>                                                                                                           |
| 34 | Chr6: 70.425-70.575   | 6 | 53625001  | 53775000 | <i>LOC101109539-TRNAC-GCA-144</i>                                                                                                           |
|    |                       | 6 | 70425001  | 70575000 | <i>LOC101116147-KDR, KDR, KDR-SRD5A3</i>                                                                                                    |
|    |                       | 6 | 79875001  | 80025000 | <i>TECRL-LOC106991226, LOC106991226, LOC106991226-LOC101119727</i>                                                                          |
| 35 | Chr6: 79.875-80.25    | 6 | 79950001  | 80100000 | <i>TECRL-LOC106991226, LOC106991226, LOC106991226-LOC101119727</i>                                                                          |
|    |                       | 6 | 80025001  | 80175000 | <i>LOC106991226-LOC101119727</i>                                                                                                            |
|    |                       | 6 | 80100001  | 80250000 | <i>LOC106991226-LOC101119727</i>                                                                                                            |
| 36 | Chr6: 81.525-81.75    | 6 | 81525001  | 81675000 | <i>LOC101120245-TRNAW-CCA-57</i>                                                                                                            |
|    |                       | 6 | 81600001  | 81750000 | <i>LOC101120245-TRNAW-CCA-57</i>                                                                                                            |
| 37 | Chr6: 115.875-116.025 | 6 | 115875001 | 1.16E+08 | <i>WHSC1, WHSC1-LETM1, LETM1, FGFR3, LOC106991222</i>                                                                                       |
|    |                       | 6 | 116325001 | 1.16E+08 | <i>LOC105615563-FGFRL1, FGFRL1, FGFRL1-IDUA, IDUA, LOC105613208, LOC105613208-DGKQ, TMEM175, TMEM175-GAK, GAK</i>                           |
|    |                       | 6 | 116400001 | 1.17E+08 | <i>TMEM175, TMEM175-GAK, GAK, GAK-CPLX1, CPLX1, CPLX1-LOC105615565</i>                                                                      |
| 38 | Chr6: 116.325-117     | 6 | 116475001 | 1.17E+08 | <i>GAK, GAK-CPLX1, CPLX1, CPLX1-LOC105615565, LOC105615565, LOC105615565-UVSSA</i>                                                          |
|    |                       | 6 | 116700001 | 1.17E+08 | <i>PCGF3, PCGF3-MFSD7, MFSD7, MFSD7-ATP5I, ATP5I, PDE6B, LOC101108751, LOC101108751-LOC105613214, LOC105613214, LOC105613214-PIGG, PIGG</i> |
|    |                       | 6 | 116775001 | 1.17E+08 | <i>PDE6B, LOC101108751, LOC101108751-LOC105613214, LOC105613214, LOC105613214-PIGG, PIGG</i>                                                |

|    |                      |    |           |          |                                                                                                                            |
|----|----------------------|----|-----------|----------|----------------------------------------------------------------------------------------------------------------------------|
|    |                      | 6  | 116850001 | 1.17E+08 | <i>PIGG</i>                                                                                                                |
| 39 | Chr7: 72.525-72.675  | 7  | 72525001  | 72675000 | <i>PPP2R5E, PPP2R5E-WDR89</i>                                                                                              |
| 40 | Chr8: 67.2-67.35     | 8  | 67200001  | 67350000 | <i>HIVEP2, HIVEP2-AIG1</i>                                                                                                 |
| 41 | Chr8: 89.4-89.55     | 8  | 89400001  | 89550000 | <i>SMOC2-THBS2</i>                                                                                                         |
| 42 | Chr9: 30.825-30.975  | 9  | 30825001  | 30975000 | <i>LOC101110068-LOC101110341, LOC101110341,<br/>LOC101110341-LOC101110602, LOC101110602,<br/>LOC101110602-TRNAM-CAU-10</i> |
| 43 | Chr9: 36-36.225      | 9  | 36000001  | 36150000 | <i>LYN-RPS20, RPS20, RPS20-MOS, MOS, MOS-PLAG1,<br/>PLAG1, CHCHD7, CHCHD7-SDR16C5</i>                                      |
|    |                      | 9  | 36075001  | 36225000 | <i>PLAG1, CHCHD7, CHCHD7-SDR16C5, SDR16C5,<br/>SDR16C5-LOC101116323, LOC101116323</i>                                      |
| 44 | Chr9: 37.8-37.95     | 9  | 37800001  | 37950000 | <i>TOX, TRNAC-GCA-170</i>                                                                                                  |
| 45 | Chr10: 7.425-7.575   | 10 | 7425001   | 7575000  | <i>LOC101105926-LOC101121613</i>                                                                                           |
| 46 | Chr10: 31.875-32.025 | 10 | 31875001  | 32025000 | <i>FLT1, FLT1-PAN3</i>                                                                                                     |
| 47 | Chr10: 35.4-35.625   | 10 | 35400001  | 35550000 | <i>LOC105609559-FGF9</i>                                                                                                   |
|    |                      | 10 | 35475001  | 35625000 | <i>LOC105609559-FGF9, FGF9, FGF9-MICU2</i>                                                                                 |
|    |                      | 10 | 37500001  | 37650000 | <i>ATP12A-LOC105614068</i>                                                                                                 |
| 48 | Chr10: 37.5-37.95    | 10 | 37650001  | 37800000 | <i>ATP12A-LOC105614068, LOC105614068,<br/>LOC105614068-LOC101120586</i>                                                    |
|    |                      | 10 | 37725001  | 37875000 | <i>LOC105614068-LOC101120586</i>                                                                                           |
|    |                      | 10 | 37800001  | 37950000 | <i>LOC105614068-LOC101120586</i>                                                                                           |
| 49 | Chr10: 41.775-41.925 | 10 | 41775001  | 41925000 | <i>LOC101121273-LOC101121526</i>                                                                                           |
| 50 | Chr10: 43.35-43.5    | 10 | 43350001  | 43500000 | <i>LOC101121526-TRNAW-CCA-83</i>                                                                                           |
| 51 | Chr10: 75.15-75.3    | 10 | 75150001  | 75300000 | <i>DOCK9, LOC105616225, LOC105616225-UBAC2</i>                                                                             |
| 52 | Chr11: 10.725-10.875 | 11 | 10725001  | 10875000 | <i>INTS2, BRP1</i>                                                                                                         |

|    |                      |    |          |          |                                                                                                                                                                   |
|----|----------------------|----|----------|----------|-------------------------------------------------------------------------------------------------------------------------------------------------------------------|
| 53 | Chr11: 24.6-24.75    | 11 | 2460001  | 2475000  | <i>MYBBP1A, GGT6, TEKTI, SMTNL2, LOC105610740, LOC105610748, LOC105610748-FBXO39, FBXO39, XAF1, LOC101112994</i>                                                  |
| 54 | Chr12: 42.675-42.825 | 12 | 42675001 | 42825000 | <i>ENO1-RERE, RERE</i>                                                                                                                                            |
|    |                      | 12 | 78675001 | 78825000 | <i>LOC106991464-NAVI, NAVI, NAVI-IPO9, IPO9 NAVI, NAVI-IPO9, IPO9, IPO9-SHISA4, SHISA4,</i>                                                                       |
|    |                      | 12 | 78750001 | 78900000 | <i>SHISA4-LOC105610030, LOC105610030, LOC105610030-LOC105610031 IPO9, IPO9-SHISA4, SHISA4, IPO9-SHISA4, SHISA4, SHISA4-LOC105610030, LOC105610030,</i>            |
| 55 | Chr12: 78.675-79.05  | 12 | 78825001 | 78975000 | <i>LOC105610030-LOC105610031, LOC105610031, TIMM17A, TIMM17A-RNPEP, RNPEP, ELF3, ELF3-LOC105610032, LOC105610032</i>                                              |
|    |                      | 12 | 78900001 | 79050000 | <i>LOC105610031, TIMM17A, TIMM17A-RNPEP, RNPEP, ELF3, ELF3-LOC105610032, LOC105610032, LOC105610032-GPR37L1, GPR37L1, ARL8A, ARL8A-LOC101114718, LOC101114718</i> |
| 56 | Chr13: 49.2-49.35    | 13 | 49200001 | 49350000 | <i>LOC101110166-LOC101110438</i>                                                                                                                                  |
|    |                      | 13 | 49575001 | 49725000 | <i>LOC101110166-LOC101110438, LOC101110438-HAO1</i>                                                                                                               |
| 57 | Chr13: 49.575-49.95  | 13 | 49650001 | 49800000 | <i>LOC101110166-LOC101110438, LOC101110438-HAO1</i>                                                                                                               |
|    |                      | 13 | 49725001 | 49875000 | <i>LOC101110438-HAO1</i>                                                                                                                                          |
|    |                      | 13 | 49800001 | 49950000 | <i>LOC101110438-HAO1, HAO1</i>                                                                                                                                    |
|    |                      | 13 | 50175001 | 50325000 | <i>ADRA1D, ADRA1D-SMOX, SMOX, SMOX-LOC105606258</i>                                                                                                               |
| 58 | Chr13: 50.175-50.625 | 13 | 50250001 | 50400000 | <i>SMOX-LOC105606258, LOC105606258, LOC105606258-RNF24</i>                                                                                                        |
|    |                      | 13 | 50325001 | 50475000 | <i>SMOX-LOC105606258, LOC105606258,</i>                                                                                                                           |

|    |                      |    |          |          |                                                                                                                                      |
|----|----------------------|----|----------|----------|--------------------------------------------------------------------------------------------------------------------------------------|
|    |                      |    |          |          | <i>LOC105606258-RNF24, RNF24</i>                                                                                                     |
|    |                      | 13 | 50400001 | 50550000 | <i>LOC105606258-RNF24, RNF24, RNF24-PANK2, PANK2, PANK2-MAVS</i>                                                                     |
|    |                      | 13 | 50475001 | 50625000 | <i>RNF24, RNF24-PANK2, PANK2, PANK2-MAVS, MAVS, LOC105606256, LOC105606256-AP5S1, AP5S1</i>                                          |
|    |                      | 13 | 53100001 | 53250000 | <i>PRPF6, SAMD10, ZNF512B, UCKL1, DNAJC5, TPD52L2, ABHD16B, ZBTB46</i>                                                               |
|    |                      | 13 | 53175001 | 53325000 | <i>TPD52L2, ABHD16B, ZBTB46, ZGPAT, ARFRP1, TNFRSF6B, RTEL1, STMN3</i>                                                               |
| 59 | Chr13: 53.1-53.55    | 13 | 53250001 | 53400000 | <i>ZBTB46, ZGPAT, ARFRP1, TNFRSF6B, RTEL1, STMN3, GMEB2, C13H20orf195, SRMS, PTK6, PDPDF, EEF1A2</i>                                 |
|    |                      | 13 | 53325001 | 53475000 | <i>STMN3, GMEB2, C13H20orf195, SRMS, PTK6, PDPDF, EEF1A2, KCNQ2</i>                                                                  |
|    |                      | 13 | 53400001 | 53550000 | <i>EEF1A2, KCNQ2, CHRNA4, COL20A1, ARFGAP1, BIRC7</i>                                                                                |
| 60 | Chr13: 56.25-56.4    | 13 | 56250001 | 56400000 | <i>EDN3, LOC105616728, ZNF831</i>                                                                                                    |
| 61 | Chr13: 63-63.15      | 13 | 63000001 | 63150000 | <i>ASIP</i>                                                                                                                          |
|    |                      | 14 | 34275001 | 34425000 | <i>ZDHHC1, HSD11B2, ATP6V0D1, AGRP, LOC105606370, FAM65A, LOC106991595, CTCF</i>                                                     |
|    |                      | 14 | 34350001 | 34500000 | <i>FAM65A, LOC106991595, CTCF, RLTPR, ACD, PARD6A, ACTB, ENKD1, C14H16orf86, GFOD2</i>                                               |
|    |                      | 14 | 34425001 | 34575000 | <i>CTCF, RLTPR, ACD, PARD6A, ACTB, ENKD1, C14H16orf86, GFOD2, RANBP10, TSNAXIP1</i>                                                  |
| 63 | Chr15: 21.825-21.975 | 15 | 21825001 | 21975000 | <i>LOC105602162, IL18, TEX12, BCO2</i>                                                                                               |
|    |                      |    |          |          | <i>LOC101104177, LOC101104426, LOC101104685, LOC101104933, LOC101105186, LOC101105439, LOC101105686, LOC101105946, LOC101106201,</i> |
| 64 | Chr15: 47.55-47.775  | 15 | 47550001 | 47700000 |                                                                                                                                      |



|    |                      |    |          |          | <i>LOC101106712</i>                                                                                                                               |
|----|----------------------|----|----------|----------|---------------------------------------------------------------------------------------------------------------------------------------------------|
|    |                      |    |          |          | <i>LOC101105439, LOC101105686, LOC101105946, LOC101106201, LOC101106459, LOC101106712, LOC101106966, LOC101107221, LOC101107469, LOC101107731</i> |
| 65 | Chr16: 70.8-70.95    | 16 | 70800001 | 70950000 | <i>CEP72, TPPP, BRD9, TRIP13, LOC105602658</i>                                                                                                    |
| 66 | Chr17: 33-33.15      | 17 | 33000001 | 33150000 | <i>ANKRD50-LOC101101922, LOC101101922</i>                                                                                                         |
|    |                      | 17 | 52125001 | 52275000 | <i>OGFOD2, ABCB9, VPS37B, HIP1R, CCDC62</i>                                                                                                       |
| 67 | Chr17: 52.125-52.575 | 17 | 52200001 | 52350000 | <i>VPS37B, HIP1R, CCDC62, DENR, HCAR1</i>                                                                                                         |
|    |                      | 17 | 52425001 | 52575000 | <i>KNTC1, RSRC2, ZCCHC8, CLIP1</i>                                                                                                                |
| 68 | Chr17: 53.475-53.7   | 17 | 53475001 | 53625000 | <i>CAMKK2, P2RX4, P2RX7, IFT81</i>                                                                                                                |
|    |                      | 17 | 53550001 | 53700000 | <i>P2RX7, IFT81</i>                                                                                                                               |
| 69 | Chr17: 59.4-59.55    | 17 | 59400001 | 59550000 | <i>LOC105602894-TBX3</i>                                                                                                                          |
| 70 | Chr17: 64.95-65.1    | 17 | 64950001 | 65100000 | <i>KIAA1671, CRYBB3, CRYBB2, ADRBK2</i>                                                                                                           |
| 71 | Chr18: 22.65-22.8    | 18 | 22650001 | 22800000 | <i>BNC1</i>                                                                                                                                       |
|    |                      | 18 | 23550001 | 23700000 | <i>EFTUD1-MEX3B, MEX3B-MORF4L1</i>                                                                                                                |
| 72 | Chr18: 23.55-23.85   | 18 | 23625001 | 23775000 | <i>MEX3B-MORF4L1</i>                                                                                                                              |
|    |                      | 18 | 23700001 | 23850000 | <i>MEX3B-MORF4L1</i>                                                                                                                              |
|    |                      | 18 | 32175001 | 32325000 | <i>PTPN9, SIN3A</i>                                                                                                                               |
|    |                      | 18 | 32250001 | 32400000 | <i>PTPN9, SIN3A, MAN2C1, NEIL1, COMMD4, LOC105603152, LOC105603296, LOC105603153</i>                                                              |
| 73 | Chr18: 32.175-32.475 |    |          |          | <i>MAN2C1, NEIL1, COMMD4, LOC105603152, LOC105603296, LOC105603153, C18H15orf39, LOC105603154</i>                                                 |
|    |                      | 18 | 32325001 | 32475000 | <i>LOC105603154</i>                                                                                                                               |
| 74 | Chr18: 45.15-45.6    | 18 | 45150001 | 45300000 | <i>LOC106991743</i>                                                                                                                               |

|    |                      |    |          |          |                                                                        |
|----|----------------------|----|----------|----------|------------------------------------------------------------------------|
|    |                      | 18 | 45375001 | 45525000 | <i>LOC106991744, LOC106991745</i>                                      |
|    |                      | 18 | 45450001 | 45600000 | <i>LOC106991744, LOC106991745, NKX2-1</i>                              |
|    |                      | 18 | 65850001 | 66000000 | <i>ANKRD9, ANKRD9-RCOR1</i>                                            |
| 75 | Chr18: 65.85-66.15   | 18 | 65925001 | 66075000 | <i>RCOR1, RCOR1-TRAF3</i>                                              |
|    |                      | 18 | 66000001 | 66150000 | <i>RCOR1, RCOR1-TRAF3, TRAF3</i>                                       |
| 76 | Chr19: 60.375-60.525 | 19 | 60375001 | 60525000 | <i>KLF15, CFAP100, LOC106990579</i>                                    |
| 77 | Chr20: 10.8-10.95    | 20 | 10800001 | 10950000 | <i>PPIL1, C20H6orf89, PII6, MTCH1, LOC105603679, FGD2</i>              |
|    |                      | 20 | 15000001 | 15150000 | <i>APOBEC2, OARD1, NFYA, LOC101108001, TREML1, TREM2</i>               |
| 78 | Chr20: 15-15.225     | 20 | 15075001 | 15225000 | <i>LOC101108001, TREML1, TREM2</i>                                     |
|    |                      | 20 | 49875001 | 50025000 | <i>GMDS</i>                                                            |
|    |                      | 20 | 49950001 | 50100000 | <i>GMDS, LOC105603912</i>                                              |
|    |                      | 20 | 50025001 | 50175000 | <i>GMDS, LOC105603912</i>                                              |
| 79 | Chr20: 49.875-50.4   | 20 | 50100001 | 50250000 | <i>GMDS</i>                                                            |
|    |                      | 20 | 50175001 | 50325000 | <i>GMDS, FOXC1, FOXC1-TRNAS-GGA-94</i>                                 |
|    |                      | 20 | 50250001 | 50400000 | <i>GMDS, FOXC1-TRNAS-GGA-94, TRNAS-GGA-94</i>                          |
|    |                      | 20 | 50850001 | 51000000 | <i>IRF4, DUSP22, LOC105603919</i>                                      |
| 80 | Chr20: 50.85-51.15   | 20 | 50925001 | 51075000 | <i>DUSP22, LOC105603919</i>                                            |
|    |                      | 20 | 51000001 | 51150000 | -                                                                      |
| 81 | Chr21: 49.65-49.8    | 21 | 49650001 | 49800000 | <i>IFITM5, LOC105604160, ATHL1, NLRP6, PSMD13, SIRT3, RIC8A, BET1L</i> |
| 82 | Chr22: 41.1-41.25    | 22 | 41100001 | 41250000 | <i>PLEKHA1, HTRA1</i>                                                  |
| 83 | Chr24: 10.35-10.5    | 24 | 10350001 | 10500000 | <i>SNN, TXNDC11, ZC3H7A, LOC105604663</i>                              |
| 84 | Chr24: 32.625-32.775 | 24 | 32625001 | 32775000 | <i>LOC101112784, TRNAC-ACA-78, NCF1, GTF2I, GTF2I-GTF2IRD1</i>         |

|    |                       |    |           |          |                                                                           |
|----|-----------------------|----|-----------|----------|---------------------------------------------------------------------------|
| 85 | Chr24: 34.575-34.8    | 24 | 34575001  | 34725000 | <i>LOC106991890-CUX1, CUX1, LOC105604781, TRNAE-UUC-101, LOC105604780</i> |
|    |                       | 24 | 34650001  | 34800000 | <i>CUX1, LOC105604780</i>                                                 |
|    |                       | 24 | 41625001  | 41775000 | <i>LOC106991898, FAM20C</i>                                               |
| 86 | Chr24: 41.625-42.075  | 24 | 41700001  | 41850000 | <i>LOC106991898, FAM20C</i>                                               |
|    |                       | 24 | 41850001  | 42000000 | <i>FAM20C-LOC105604839, LOC105604839</i>                                  |
|    |                       | 24 | 41925001  | 42075000 | <i>LOC105604839</i>                                                       |
| 87 | Chr25: 18.825-18.975  | 25 | 18825001  | 18975000 | <i>LOC101121824, LOC101121824-NRBF2</i>                                   |
| 88 | ChrX: 19.95-20.1      | X  | 19950001  | 20100000 | <i>PHEX-LOC106991986</i>                                                  |
| 89 | ChrX: 76.275-76.5     | X  | 76275001  | 76425000 | <i>LOC101116546-LOC101116810</i>                                          |
|    |                       | X  | 76350001  | 76500000 | <i>LOC101116810</i>                                                       |
| 90 | ChrX: 135.075-135.225 | X  | 135075001 | 1.35E+08 | <i>PABPC5</i>                                                             |

**Supplementary Table S10** Putatively selected regions in indigenous breed-to-improved breed comparison.

| No. | Combined region (Mb) | Chromosome | Position |          | Gene name                                                     |
|-----|----------------------|------------|----------|----------|---------------------------------------------------------------|
|     |                      |            | Start    | End      |                                                               |
| 1   | Chr1:27.45-27.9      | 1          | 27450001 | 27600000 | <i>C1H1orf123, MAGOH, MAGOH-LRP8, LRP8, LRP8-LOC101119086</i> |
|     |                      | 1          | 27675001 | 27825000 | <i>DMRTB1, GLIS1, GLIS1-NDC1</i>                              |
|     |                      | 1          | 27750001 | 27900000 | <i>GLIS1, GLIS1-NDC1</i>                                      |
|     |                      | 1          | 68775001 | 68925000 | <i>RPAP2, GFII, EVI5</i>                                      |
| 2   | Chr1:68.775-69.15    | 1          | 68850001 | 69000000 | <i>EVI5</i>                                                   |
|     |                      | 1          | 68925001 | 69075000 | <i>EVI5</i>                                                   |
|     |                      | 1          | 69000001 | 69150000 | <i>EVI5, RPL5</i>                                             |

|   |                      |   |          |          |                                                                               |
|---|----------------------|---|----------|----------|-------------------------------------------------------------------------------|
| 3 | Chr1:89.025-89.175   | 1 | 89025001 | 89175000 | <i>CAPZA1, MOV10, RHOC, PPM1J, FAM19A3, TRNAL-UAA, TRNAL-UAA-LOC101108016</i> |
| 4 | Chr1:109.425-109.575 | 1 | 1.09E+08 | 1.1E+08  | <i>LOC105612162, PEA15, DCAF8, COPA, NCSTN</i>                                |
|   |                      | 1 | 1.19E+08 | 1.19E+08 | <i>LOC101118835-RCANI, RCANI, RCANI-KCNE1, KCNE1, SMIM11A, C1H21orf140,</i>   |
| 5 | Chr1:119.025-119.475 | 1 | 1.19E+08 | 1.19E+08 | <i>KCNE1-SMIM11A, SMIM11A, C1H21orf140, SMIM11A, KCNE2, KCNE2-MRPS6</i>       |
|   |                      | 1 | 1.19E+08 | 1.19E+08 | <i>SMIM11A-KCNE2, KCNE2, KCNE2-MRPS6</i>                                      |
|   |                      | 1 | 1.19E+08 | 1.19E+08 | <i>KCNE2-MRPS6</i>                                                            |
|   |                      | 1 | 1.19E+08 | 1.19E+08 | <i>KCNE2-MRPS6, MRPS6, SLC5A3</i>                                             |
|   |                      | 1 | 1.61E+08 | 1.61E+08 | <i>GPR15, GPR15-CPOX, CPOX, LOC105609869</i>                                  |
| 6 | Chr1:161.1-161.325   | 1 | 1.61E+08 | 1.61E+08 | <i>CPOX-LOC105609869, LOC105609869, ST3GAL6</i>                               |
| 7 | Chr1:164.625-164.775 | 1 | 1.65E+08 | 1.65E+08 | <i>LOC105616787-LOC105616785, LOC105616785, LOC105616785-ZPLD1</i>            |
| 8 | Chr1:234.6-234.825   | 1 | 2.35E+08 | 2.35E+08 | <i>MED12L, P2RY13, GPR87, P2RY14, P2RY12</i>                                  |

|    |                      |   |          |          |                                                                                                                                   |
|----|----------------------|---|----------|----------|-----------------------------------------------------------------------------------------------------------------------------------|
|    |                      | 1 | 2.35E+08 | 2.35E+08 | <i>MED12L, P2RY13, GPR87, P2RY14, GPR171</i>                                                                                      |
| 9  | Chr1:236.925-237.075 | 1 | 2.37E+08 | 2.37E+08 | <i>HPS3, LOC101122652, HPS3-HLTF, HLTF,<br/>HLTF-GYG1, GYG1</i>                                                                   |
|    |                      | 1 | 2.75E+08 | 2.75E+08 | <i>RAB5A, PP2D1, PP2D1-KAT2B, KAT2B,<br/>KAT2B-SGOL1</i>                                                                          |
| 10 | Chr1:275.1-275.325   | 1 | 2.75E+08 | 2.75E+08 | <i>KAT2B, KAT2B-SGOL1, SGOL1,<br/>LOC101116279, LOC101116279-ZNF596</i>                                                           |
|    |                      | 2 | 225001   | 375000   | <i>FAM150B-LOC105606464, LOC105606464,<br/>LOC105606464-LOC105606460</i>                                                          |
| 11 | Chr2:0.225-0.45      | 2 | 300001   | 450000   | <i>FAM150B-LOC105606464, LOC105606464,<br/>LOC105606464-LOC105606460,<br/>LOC105606460, LOC105606458,<br/>LOC105606458-TMEM18</i> |
|    |                      | 2 | 30075001 | 30225000 | <i>ERCC6L2</i>                                                                                                                    |
| 12 | Chr2:30.075-30.3     | 2 | 30150001 | 30300000 | <i>ERCC6L2, ERCC6L2-LOC101111936</i>                                                                                              |
|    |                      | 2 | 58575001 | 58725000 | <i>GNAQ, GNAQ-GNA14</i>                                                                                                           |
| 13 | Chr2:58.575-58.8     | 2 | 58650001 | 58800000 | <i>GNAQ, GNAQ-GNA14, GNA14</i>                                                                                                    |
|    |                      | 2 | 1.21E+08 | 1.21E+08 | <i>CALCRL-LOC105608872, LOC105608872,<br/>LOC105608872-ZSWIM2</i>                                                                 |
| 14 | Chr2:121.2-121.35    | 2 | 1.21E+08 | 1.21E+08 | <i>CALCRL-LOC105608872, LOC105608872,<br/>LOC105608872-ZSWIM2</i>                                                                 |
| 15 | Chr2:197.925-198.075 | 2 | 1.98E+08 | 1.98E+08 | <i>CCDC150, CCDC150-GTF3C3, GTF3C3</i>                                                                                            |

|    |                      |   |          |          |                                                                                                                                                            |
|----|----------------------|---|----------|----------|------------------------------------------------------------------------------------------------------------------------------------------------------------|
| 16 | Chr3:166.425-166.575 | 3 | 1.66E+08 | 1.67E+08 | <i>LOC105609279-LOC105609280,<br/>LOC105609280</i>                                                                                                         |
|    |                      | 3 | 2.13E+08 | 2.13E+08 | <i>CECR1-CECR2, CECR2, CECR2-ATP6V1E1,<br/>ATP6V1E1, BCL2L13</i>                                                                                           |
|    |                      | 3 | 2.13E+08 | 2.13E+08 | <i>CECR2, CECR2-ATP6V1E1, ATP6V1E1,<br/>BCL2L13, TRNAE-UUC-43, LOC105614865,<br/>BID, MICAL3</i>                                                           |
|    |                      | 3 | 2.13E+08 | 2.13E+08 | <i>BCL2L13, LOC105614865, BID, MICAL3</i>                                                                                                                  |
| 17 | Chr3:212.7-213.225   | 3 | 2.13E+08 | 2.13E+08 | <i>MICAL3, MICAL3-LOC105614866</i>                                                                                                                         |
|    |                      | 3 | 2.13E+08 | 2.13E+08 | <i>MICAL3, MICAL3-LOC105614866,<br/>LOC105614866, PEX26, LOC105610007,<br/>TUBA8, TUBA8-CDC42EP1</i>                                                       |
|    |                      | 3 | 2.13E+08 | 2.13E+08 | <i>MICAL3-LOC105614866, LOC105614866,<br/>PEX26, PEX26-LOC105610007, TUBA8,<br/>TUBA8-CDC42EP1, CDC42EP1, LGALS2,<br/>LOC105609489, GGA1, LOC105609488</i> |

|    |                    |   |          |          |                                                                                                 |
|----|--------------------|---|----------|----------|-------------------------------------------------------------------------------------------------|
| 18 | Chr3:214.2-214.425 | 3 | 2.14E+08 | 2.14E+08 | <i>CBX6, CBX6-APOBEC3Z1, APOBEC3Z1, LOC105609481, APOBEC3F, APOBEC3F-CBX7, CBX7, CBX7-PDGFB</i> |
|    |                    | 3 | 2.14E+08 | 2.14E+08 | <i>APOBEC3Z1-LOC105609481, LOC105609481, APOBEC3F, CBX7, PDGFB, LOC106991092</i>                |
|    | Chr4:28.425-28.575 | 4 | 28425001 | 28575000 | <i>TWISTNB, LOC105611892, TMEM196</i>                                                           |
|    |                    | 4 | 46650001 | 46800000 | <i>RINT1, LOC101122944, ATXN7L1,</i>                                                            |
| 19 | Chr4:46.65-47.1    | 4 | 46725001 | 46875000 | <i>ATXN7L1</i>                                                                                  |
|    |                    | 4 | 46950001 | 47100000 | <i>ATXN7L1, ATXN7L1-CDHR3, CDHR3, LOC105609617</i>                                              |
| 20 | Chr4:74.625-74.85  | 4 | 74625001 | 74775000 | <i>HUS1-TNS3, TNS3</i>                                                                          |
|    |                    | 4 | 74700001 | 74850000 | <i>HUS1-TNS3, TNS3</i>                                                                          |
| 21 | Chr4:75.675-75.9   | 4 | 75675001 | 75825000 | <i>LOC105615056-IGFBP3</i>                                                                      |
|    |                    | 4 | 75750001 | 75900000 | <i>LOC105615056-IGFBP3</i>                                                                      |
| 22 | Chr5:19.35-19.5    | 5 | 19350001 | 19500000 | <i>RAD50, IL5, RAD50-IRF1, IRF1, LOC105615229</i>                                               |
|    |                    | 5 | 43350001 | 43500000 | <i>LOC105607068-JADE2, JADE2, LOC105607066, SAR1B, SEC24A</i>                                   |
| 23 | Chr5:43.35-43.875  | 5 | 43425001 | 43575000 | <i>LOC105607066, SAR1B, SEC24A, CAMLG, DDX46</i>                                                |

|    |                   |   |          |          |                                                                                                             |
|----|-------------------|---|----------|----------|-------------------------------------------------------------------------------------------------------------|
|    |                   | 5 | 43725001 | 43875000 | <i>CATSPER3, PITXI, LOC106991192</i>                                                                        |
| 24 | Chr5:70.8-71.025  | 5 | 70800001 | 70950000 | <i>TRNAF-GAA-5-GABRA1, GABRA1,<br/>GABRA1-GABRG2</i>                                                        |
|    |                   | 5 | 70875001 | 71025000 | <i>GABRA1-GABRG2, GABRG2</i>                                                                                |
| 25 | Chr6:22.05-22.2   | 6 | 22050001 | 22200000 | <i>LOC106991231-UBE2D3, UBE2D3,<br/>UBE2D3-MANBA, MANBA</i>                                                 |
| 26 | Chr6:32.1-32.325  | 6 | 32100001 | 32250000 | <i>GRID2</i>                                                                                                |
|    |                   | 6 | 32175001 | 32325000 | <i>GRID2</i>                                                                                                |
| 27 | Chr6:36.3-36.45   | 6 | 36300001 | 36450000 | <i>HERC6-PPMIK, PPMIK, ABCG2</i>                                                                            |
|    |                   | 6 | 36975001 | 37125000 | <i>LOC101103815-TRNAA-CGC-2,<br/>TRNAA-CGC-2, TRNAA-CGC-2-LAP3, LAP3,<br/>MED28, FAM184B, LOC105615455</i>  |
| 28 | Chr6:36.975-37.35 | 6 | 37125001 | 37275000 | <i>FAM184B, NCAPG, LOC105608051, DCAF16,<br/>LCORL, NCAPG</i>                                               |
|    |                   | 6 | 37200001 | 37350000 | <i>DCAF16, NCAPG, LCORL, LOC105615456</i>                                                                   |
|    |                   | 6 | 69750001 | 69900000 | <i>PDGFRA-LOC106990548, LOC106990548,<br/>LOC106990548-LOC105613064,<br/>LOC105613064, LOC105613064-KIT</i> |
| 29 | Chr6:69.75-70.05  | 6 | 69825001 | 69975000 | <i>LOC106990548-LOC105613064,<br/>LOC105613064, LOC105613064-KIT</i>                                        |



|    |                    |   |          |          |                                                                                  |
|----|--------------------|---|----------|----------|----------------------------------------------------------------------------------|
| 30 | Chr6:79.35-79.725  | 6 | 69900001 | 70050000 | <i>LOC105613064-KIT</i>                                                          |
|    |                    | 6 | 79350001 | 79500000 | <i>LOC101119476-TECRL</i>                                                        |
|    |                    | 6 | 79575001 | 79725000 | <i>TECRL, TECRL-LOC106991226</i>                                                 |
|    |                    | 6 | 1.16E+08 | 1.17E+08 | <i>TMEM175, TMEM175-GAK, GAK, CPLX1, CPLX1-LOC105615565</i>                      |
| 31 | Chr6:116.4-117     | 6 | 1.17E+08 | 1.17E+08 | <i>PCGF3, PCGF3-MFSD7, MFSD7, ATP5I, PDE6B, LOC101108751, LOC105613214, PIGG</i> |
|    |                    | 6 | 1.17E+08 | 1.17E+08 | <i>PDE6B, LOC101108751, LOC105613214, PIGG</i>                                   |
|    |                    | 6 | 1.17E+08 | 1.17E+08 | <i>PIGG</i>                                                                      |
| 32 | Chr7:33.975-34.2   | 7 | 33975001 | 34125000 | <i>TYRO3, TYRO3-LOC105608920, LOC105608920, MGA, LOC101116404, LOC106991249</i>  |
|    |                    | 7 | 34050001 | 34200000 | <i>MGA, LOC106991249, MAPKBPI</i>                                                |
| 33 | Chr7:34.725-34.95  | 7 | 34725001 | 34875000 | <i>GANC, CAPN3, ZNF106, SNAP23</i>                                               |
|    |                    | 7 | 34800001 | 34950000 | <i>ZNF106, SNAP23, LRRC57, HAUS2, LOC101117673, STARD9</i>                       |
| 34 | Chr7:42.075-42.225 | 7 | 42075001 | 42225000 | <i>NID2-LOC101107359</i>                                                         |
| 35 | Chr7:57.375-57.6   | 7 | 57375001 | 57525000 | <i>LOC105607291, ATP8B4</i>                                                      |
|    |                    | 7 | 57450001 | 57600000 | <i>LOC105607291, LOC105607291-DTWD1</i>                                          |
| 36 | Chr8:10.575-10.8   | 8 | 10575001 | 10725000 | <i>PRSS35, SNAP91, LOC105613508</i>                                              |
|    |                    | 8 | 10650001 | 10800000 | <i>SNAP91, SNAP91-C8H6orf58</i>                                                  |

|    |                     |    |          |          |                                                                       |
|----|---------------------|----|----------|----------|-----------------------------------------------------------------------|
|    |                     | 8  | 31575001 | 31725000 | <i>LOC101110517-PREP, PREP</i>                                        |
|    |                     | 8  | 31650001 | 31800000 | <i>PREP, PREP-POPDC3</i>                                              |
| 37 | Chr8:31.575-32.175  | 8  | 31875001 | 32025000 | <i>PREP-POPDC3, POPDC3, BVES, LIN28B</i>                              |
|    |                     | 8  | 31950001 | 32100000 | <i>BVES, LIN28B</i>                                                   |
|    |                     | 8  | 32025001 | 32175000 | <i>LIN28B, HACE1</i>                                                  |
|    |                     | 8  | 62550001 | 62700000 | <i>OLIG3-LOC105608892, LOC105608892, TNFAIP3</i>                      |
| 38 | Chr8:62.55-62.85    | 8  | 62625001 | 62775000 | <i>TNFAIP3, TNFAIP3-LOC101113418</i>                                  |
|    |                     | 8  | 62700001 | 62850000 | <i>TNFAIP3, TNFAIP3-LOC101113418, LOC101113418, LOC101113418-PERP</i> |
|    |                     | 8  | 90225001 | 90375000 | <i>LOC106991326-DLL1</i>                                              |
|    |                     | 8  | 90300001 | 90450000 | <i>LOC106991326-DLL1, DLL1, FAM120B</i>                               |
| 39 | Chr8:90.225-90.525  | 8  | 90375001 | 90525000 | <i>LOC106991326-DLL1, DLL1, FAM120B, FAM120B-PSMB1</i>                |
| 40 | Chr9:60.225-60.375  | 9  | 60225001 | 60375000 | <i>LOC106991339-UTP23, UTP23, UTP23-EIF3H, EIF3H</i>                  |
| 41 | Chr10:25.95-26.1    | 10 | 25950001 | 26100000 | <i>DCLK1-NBEA, NBEA</i>                                               |
| 42 | Chr10:26.7-26.85    | 10 | 26700001 | 26850000 | <i>LOC105611533, TRNAC-GCA-174</i>                                    |
| 43 | Chr10:35.475-35.625 | 10 | 35475001 | 35625000 | <i>LOC105609559-FGF9, FGF9, FGF9-MICU2</i>                            |

|    |                     |    |          |          |                                                                                                                        |
|----|---------------------|----|----------|----------|------------------------------------------------------------------------------------------------------------------------|
| 44 | Chr11:22.65-22.875  | 11 | 22650001 | 22800000 | <i>OVCA2-HIC1, HIC1, SMG6, TRNAG-UCC-21</i>                                                                            |
|    |                     | 11 | 22725001 | 22875000 | <i>SMG6, TRNAG-UCC-21, SRR</i>                                                                                         |
|    |                     | 11 | 26175001 | 26325000 | <i>TM4SF5-ZMYND15, ZMYND15, CXCL16, MED11, PELP1, ARRB2, LOC105616328, LOC105607815, LOC101116587, LOC101113251</i>    |
| 45 | Chr11:26.175-26.475 | 11 | 26250001 | 26400000 | <i>PELP1, LOC105607815, LOC101116587, LOC101113251, LOC105607814, ALOX12, RNASEK, LOC106991418, C11H17orf49, BCL6B</i> |
|    |                     | 11 | 26325001 | 26475000 | <i>LOC105607815, LOC105607814, ALOX12, RNASEK, LOC106991418, C11H17orf49, BCL6B, SLC16A13, LOC101117600, ASGR2</i>     |
| 46 | Chr11:27.6-27.75    | 11 | 27600001 | 27750000 | <i>LOC105607815, LOC105607814, ALOX12, RNASEK, LOC106991418, C11H17orf49, BCL6B, SLC16A13, LOC101117600, ASGR2</i>     |
|    |                     | 12 | 42000001 | 42150000 | <i>SLC25A33, LOC101113870, LOC105606443, LOC105606444</i>                                                              |
| 47 | Chr12:42-42.3       | 12 | 42075001 | 42225000 | <i>LOC101113870, LOC105606443, LOC105606444, SPSB1</i>                                                                 |
|    |                     | 12 | 42150001 | 42300000 | <i>SPSB1, LOC105616528, H6PD</i>                                                                                       |

|    |                    |    |          |          |                                                                                                               |
|----|--------------------|----|----------|----------|---------------------------------------------------------------------------------------------------------------|
| 48 | Chr12:52.575-52.8  | 12 | 52575001 | 52725000 | <i>LOC101114795-LOC101115051,<br/>LOC101115051, LOC105601896,<br/>LOC105601879, LOC106990612, C12H1orf158</i> |
|    |                    | 12 | 52650001 | 52800000 | <i>LOC106990612, C12H1orf158, AADA3L3</i>                                                                     |
|    |                    | 13 | 48600001 | 48750000 | <i>BMP2-LOC101117953</i>                                                                                      |
|    |                    | 13 | 48675001 | 48825000 | <i>BMP2-LOC101117953</i>                                                                                      |
| 49 | Chr13:48.6-49.125  | 13 | 48750001 | 48900000 | <i>BMP2-LOC101117953</i>                                                                                      |
|    |                    | 13 | 48825001 | 48975000 | <i>BMP2-LOC101117953, LOC101117953,<br/>LOC101117953-LOC101118207</i>                                         |
|    |                    | 13 | 48900001 | 49050000 | <i>BMP2-LOC101117953, LOC101117953,<br/>LOC101117953-LOC101118207</i>                                         |
| 50 | Chr13:52.875-53.55 | 13 | 48975001 | 49125000 | <i>LOC101117953-LOC101118207,<br/>LOC101118207, LOC101110166</i>                                              |
|    |                    | 13 | 52875001 | 53025000 | <i>GINS1-TRNAC-GCA-202, TRNAC-GCA-202,<br/>PCMTD2, LOC105606235, MYT1,<br/>LOC105616721, NPBWR2, OPR1</i>     |

|    |                     |    |          |          |                                                                                                             |
|----|---------------------|----|----------|----------|-------------------------------------------------------------------------------------------------------------|
|    |                     | 13 | 52950001 | 53100000 | <i>LOC105616721, LOC105616721-NPBWR2, NPBWR2, OPRL1, LKAAEAR1, RGS19, TCEA2, SOX18, LOC105616788, PRPF6</i> |
|    |                     | 13 | 53175001 | 53325000 | <i>DNAJC5-TPD52L2, TPD52L2, ABHD16B, ZBTB46, ZGPAT, ARFRP1, TNFRSF6B, RTEL1, STMN3</i>                      |
|    |                     | 13 | 53250001 | 53400000 | <i>ZBTB46, ZGPAT, ARFRP1, TNFRSF6B, RTEL1, STMN3, GMEB2, C13H20orf195, SRMS, PTK6, PPDPF, EEF1A2</i>        |
|    |                     | 13 | 53325001 | 53475000 | <i>STMN3, GMEB2, C13H20orf195, SRMS, PTK6, PPDPF, EEF1A2, KCNQ2, KCNQ2-CHRNA4</i>                           |
|    |                     | 13 | 53400001 | 53550000 | <i>EEF1A2, KCNQ2, CHRNA4, COL20A1, ARFGAP1, BIRC7, BIRC7-YTHDF1</i>                                         |
|    |                     | 13 | 56175001 | 56325000 | <i>PHACTR3-EDN3, EDN3, LOC105616728</i>                                                                     |
| 51 | Chr13:56.175-56.4   | 13 | 56250001 | 56400000 | <i>PHACTR3-EDN3, EDN3, LOC105616728, ZNF831</i>                                                             |
|    |                     |    |          |          | <i>FAM110A-SLC52A3, SLC52A3, SLC52A3-SCRT2, SCRT2, SRXN1, SRXN1-TCF15</i>                                   |
| 52 | Chr13:59.475-59.625 | 13 | 59475001 | 59625000 | <i>PXMP4, ZNF341, LOC105606908, CHMP4B, CHMP4B-TRNAG-UCC-29</i>                                             |
| 53 | Chr13:62.475-62.775 | 13 | 62475001 | 62625000 |                                                                                                             |

|    |                     |    |          |          |                                                                                              |
|----|---------------------|----|----------|----------|----------------------------------------------------------------------------------------------|
|    |                     | 13 | 62550001 | 62700000 | <i>LOC105606908, CHMP4B, TRNAG-UCC-29,<br/>TRNAG-UCC-29-RALY</i>                             |
|    |                     | 13 | 62625001 | 62775000 | <i>CHMP4B-TRNAG-UCC-29, TRNAG-UCC-29,<br/>TRNAG-UCC-29-RALY, RALY</i>                        |
| 54 | Chr13:63.075-63.225 | 13 | 63075001 | 63225000 | <i>ASIP, ASIP-AHCY, AHCY-ITCH</i>                                                            |
|    |                     | 14 | 35325001 | 35475000 | <i>CDHI, TANGO6</i>                                                                          |
| 56 | Chr14:35.325-35.625 | 14 | 35400001 | 35550000 | <i>TANGO6, LOC105606375</i>                                                                  |
|    |                     | 14 | 35475001 | 35625000 | <i>TANGO6, LOC105606375, HAS3, CHTF8,<br/>UTP4, UTP4-SNTB2</i>                               |
|    |                     | 14 | 51300001 | 51450000 | <i>CEACAM20-LOC101110442, LOC101110442,<br/>IGSF23, LOC101110963, CEACAM19,<br/>CEACAM16</i> |
| 57 | Chr14:51.3-51.525   | 14 | 51375001 | 51525000 | <i>IGSF23-LOC101110963, LOC101110963,<br/>CEACAM19, CEACAM16, BCL3, CBLC, BCAM</i>           |
| 58 | Chr14:62.55-62.7    | 14 | 62550001 | 62700000 | <i>LOC105602113, LOC101121964</i>                                                            |
|    |                     | 15 | 3525001  | 3675000  | <i>LOC106991615-PDGFD</i>                                                                    |
| 59 | Chr15:3.525-3.825   | 15 | 3600001  | 3750000  | <i>LOC106991615-PDGFD</i>                                                                    |
|    |                     | 15 | 3675001  | 3825000  | <i>LOC106991615-PDGFD</i>                                                                    |
| 60 | Chr15:28.125-28.275 | 15 | 28125001 | 28275000 | <i>IL10RA, IL10RA-TMPRSS4, TMPRSS4,<br/>TMPRSS4-SCN4B</i>                                    |
| 61 | Chr16:3.225-3.45    | 16 | 3225001  | 3375000  | <i>TLX3-NPM1, NPM1, FGF18,<br/>FGF18-LOC106991647</i>                                        |

|    |                     |    |          |          |                                                                                                                                    |
|----|---------------------|----|----------|----------|------------------------------------------------------------------------------------------------------------------------------------|
|    |                     | 16 | 3300001  | 3450000  | <i>FGF18, FGF18-LOC106991647</i>                                                                                                   |
|    |                     | 16 | 40725001 | 40875000 | <i>TARS-NPR3, NPR3</i>                                                                                                             |
| 62 | Chr16:40.725-40.95  | 16 | 40800001 | 40950000 | <i>TARS-NPR3, NPR3, LOC106990644, LOC106990644-SUB1</i>                                                                            |
| 63 | Chr17:13.125-13.275 | 17 | 13125001 | 13275000 | <i>ANAPC10-HHIP, HHIP</i>                                                                                                          |
| 64 | Chr17:53.25-53.4    | 17 | 53250001 | 53400000 | <i>KDM2B, RNF34, ANAPC5, LOC105602972</i>                                                                                          |
|    |                     | 17 | 58200001 | 58350000 | <i>LOC105602892-MED13L, MED13L</i>                                                                                                 |
| 65 | Chr17:58.2-58.5     | 17 | 58275001 | 58425000 | <i>MED13L</i>                                                                                                                      |
|    |                     | 17 | 58350001 | 58500000 | <i>MED13L, MED13L-TRNAC-GCA-229</i>                                                                                                |
|    |                     | 17 | 72000001 | 72150000 | <i>TXNRD2, TXNRD2-ARVCF, ARVCF, TANGO2, DGCR8, RANBP1, ZDHHC8</i>                                                                  |
| 66 | Chr17:72-72.375     | 17 | 72075001 | 72225000 | <i>ARVCF, TANGO2, DGCR8, RANBP1, ZDHHC8, LOC105612806-RTN4R, RTN4R</i>                                                             |
|    |                     | 17 | 72150001 | 72300000 | <i>LOC105612806-RTN4R, RTN4R</i>                                                                                                   |
|    |                     | 17 | 72225001 | 72375000 | <i>RTN4R</i>                                                                                                                       |
|    |                     |    |          |          | <i>LOC101120869-LOC105603084, LOC105603084, LOC101121378, LOC105603293, LOC101121632, LOC101121887, LOC101122139, LOC101122387</i> |
| 67 | Chr18:19.2-19.425   | 18 | 19200001 | 19350000 |                                                                                                                                    |
|    |                     | 18 | 19275001 | 19425000 | <i>LOC101121887, LOC101122139, LOC101122387, LOC101122633,</i>                                                                     |

|    |                     |    |          |          |  | <i>LOC101122633-ACAN</i>                                                                                                     |
|----|---------------------|----|----------|----------|--|------------------------------------------------------------------------------------------------------------------------------|
| 68 | Chr18:38.4-38.55    | 18 | 38400001 | 38550000 |  | <i>LOC106991725-PRKD1</i>                                                                                                    |
| 69 | Chr19:31.725-31.95  | 19 | 31725001 | 31875000 |  | <i>MITF, MITF-LOC105603450</i>                                                                                               |
|    |                     | 19 | 31800001 | 31950000 |  | <i>MITF, MITF-LOC105603450</i>                                                                                               |
| 70 | Chr20:40.425-40.65  | 20 | 40425001 | 40575000 |  | <i>JARID2, LOC106991812,<br/>JARID2-LOC105603854</i>                                                                         |
|    |                     | 20 | 40500001 | 40650000 |  | <i>JARID2, LOC106991812,<br/>JARID2-LOC105603854</i>                                                                         |
| 71 | Chr20:49.275-49.425 |    |          |          |  | <i>LOC101122475,<br/>LOC101122475-LOC101122734,<br/>LOC101122734, BPHL, RIPK1, LOC106991816,<br/>NQO2, NQO2-LOC101110458</i> |
|    |                     | 20 | 49275001 | 49425000 |  |                                                                                                                              |
| 72 | Chr20:49.875-50.175 | 20 | 49875001 | 50025000 |  | <i>MYLK4-GMDS, GMDS</i>                                                                                                      |
|    |                     | 20 | 49950001 | 50100000 |  | <i>GMDS, LOC105603912</i>                                                                                                    |
|    |                     | 20 | 50025001 | 50175000 |  | <i>GMDS, LOC105603912</i>                                                                                                    |
| 73 | Chr21:44.25-44.475  | 21 | 44250001 | 44400000 |  | <i>RHOD-LOC105604121, LOC105604121,<br/>KDM2A, ADRBK1, LOC101108527</i>                                                      |
|    |                     |    |          |          |  | <i>KDM2A, ADRBK1, LOC101108527,<br/>LOC106991824, SSH3, POLD4, CLCF1,<br/>RAD9A, PPP1CA-RAD9A</i>                            |
| 74 | Chr24:1.275-1.425   | 24 | 12750001 | 1425000  |  | <i>HN1L, MAPK8IP3, EME2, SPSB3, NUBP2,<br/>IGFALS, HAGH, FAHD1, MEIOB</i>                                                    |



|    |                   |    |          |          |                                                                                               |
|----|-------------------|----|----------|----------|-----------------------------------------------------------------------------------------------|
|    |                   | 25 | 7200001  | 7350000  | <i>LOC101113195, TARBP1,<br/>TARBP1-LOC105604914</i>                                          |
| 75 | Chr25:7.2-7.5     | 25 | 7275001  | 7425000  | <i>TARBP1-LOC105604914, LOC105604914,<br/>LOC101113650, IRF2BP2,<br/>IRF2BP2-LOC105604916</i> |
|    |                   | 25 | 7350001  | 7500000  | <i>TARBP1-LOC105604914, LOC105604914,<br/>LOC101113650, IRF2BP2,<br/>IRF2BP2-LOC105604916</i> |
| 76 | ChrX:42.3-42.525  | X  | 42300001 | 42450000 | <i>LOC101108192-LOC105605445</i>                                                              |
|    |                   | X  | 42375001 | 42525000 | <i>LOC101108192-LOC105605445</i>                                                              |
| 77 | ChrX:56.25-56.475 | X  | 56250001 | 56400000 | <i>LOC101119962-AR</i>                                                                        |
|    |                   | X  | 56325001 | 56475000 | <i>LOC101119962-AR</i>                                                                        |

**Supplementary Table S11** KEGG enrichment analysis of candidate genes during domestication.

| Term                                    | Input number | Background number | P-value | Input                                                                                                       |
|-----------------------------------------|--------------|-------------------|---------|-------------------------------------------------------------------------------------------------------------|
| Rap1 signaling pathway                  | 7            | 215               | 0.00196 | <i>KITLG, PARD6A, FGF9, ACTB, FGFR3, KDR,<br/>FLT1</i>                                                      |
| Lysosome                                | 5            | 126               | 0.00386 | <i>GGAI, ABCB9, ATP6V0D1, IDUA, SLC11A1<br/>CHRNA4, PTGFR, ADRA1D, GRID2, GALR3,<br/>EDN3, P2RX4, P2RX7</i> |
| Neuroactive ligand-receptor interaction | 8            | 372               | 0.01083 | <i>PLCD4, SIN3A, ACTB, NOTCH3</i>                                                                           |
| Thyroid hormone signaling pathway       | 4            | 121               | 0.01732 | <i>MAVS, IL18, NLRP6, TRAF3, P2RX7</i>                                                                      |
| NOD-like receptor signaling pathway     | 5            | 187               | 0.01828 | <i>PTGFR, PLCD4, ADRA1D, P2RX7, P2RX4</i>                                                                   |
| Calcium signaling pathway               | 5            | 203               | 0.0248  |                                                                                                             |

|                                           |   |     |         |                                                       |
|-------------------------------------------|---|-----|---------|-------------------------------------------------------|
| MAPK signaling pathway                    | 6 | 305 | 0.03718 | <i>FGF9, KITLG, FLT1, FGFR3, KDR, LAMTOR3</i>         |
| Ras signaling pathway                     | 5 | 242 | 0.04639 | <i>FGF9, KITLG, FGFR3, KDR, FLT1</i>                  |
| Rheumatoid arthritis                      | 3 | 101 | 0.0492  | <i>IL18, ATP6V0D1, FLT1</i>                           |
| Vitamin B6 metabolism                     | 1 | 8   | 0.06871 | <i>PDXP</i>                                           |
| Oocyte meiosis                            | 3 | 121 | 0.07493 | <i>MOS, PPP2R5E, ANAPC4</i>                           |
| Influenza A                               | 4 | 198 | 0.07612 | <i>IL18, ACTB, MAVS, TRAF3</i>                        |
| Osteoclast differentiation                | 3 | 134 | 0.09424 | <i>NCF1, LCK, TREM2</i>                               |
| Regulation of actin cytoskeleton          | 4 | 219 | 0.10027 | <i>MOS, ACTB, FGFR3, FGF9</i>                         |
| PI3K-Akt signaling pathway                | 6 | 398 | 0.10105 | <i>FGF9, PPP2R5E, KITLG, FGFR3, KDR, FLT1</i>         |
| Taurine and hypotaurine metabolism        | 1 | 13  | 0.10484 | <i>GGT6</i>                                           |
| Yersinia infection                        | 3 | 141 | 0.1054  | <i>IL18, ACTB, LCK</i>                                |
| Central carbon metabolism in cancer       | 2 | 68  | 0.10542 | <i>SIRT3, FGFR3</i>                                   |
| Legionellosis                             | 2 | 68  | 0.10542 | <i>IL18, EEF1A2</i>                                   |
| Adipocytokine signaling pathway           | 2 | 73  | 0.11816 | <i>CAMKK2, AGRP</i>                                   |
| Fluid shear stress and atherosclerosis    | 3 | 149 | 0.11876 | <i>NCF1, ACTB, KDR</i>                                |
| Cytosolic DNA-sensing pathway             | 2 | 74  | 0.12075 | <i>IL18, MAVS</i>                                     |
| Inositol phosphate metabolism             | 2 | 76  | 0.12598 | <i>PLCD4, PI4K2B</i>                                  |
| Epstein-Barr virus infection              | 4 | 245 | 0.1344  | <i>TRAF3, MAVS, PSMD13, SIN3A</i>                     |
| Synaptic vesicle cycle                    | 2 | 80  | 0.13659 | <i>ATP6V0D1, CPLX1</i>                                |
| EGFR tyrosine kinase inhibitor resistance | 2 | 83  | 0.14467 | <i>FGFR3, KDR</i>                                     |
| Pantothenate and CoA biosynthesis         | 1 | 19  | 0.14635 | <i>PANK2</i>                                          |
| Pathways in cancer                        | 7 | 551 | 0.15293 | <i>TRAF3, BIRC7, NOTCH3, GLI3, FGF9, KITLG, FGFR3</i> |
| Salmonella infection                      | 2 | 88  | 0.15835 | <i>IL18, ACTB</i>                                     |
| Other glycan degradation                  | 1 | 22  | 0.16638 | <i>MAN2C1</i>                                         |
| Progesterone-mediated oocyte maturation   | 2 | 91  | 0.16667 | <i>MOS, ANAPC4</i>                                    |

|                                                        |    |      |         |                                                                                                                |
|--------------------------------------------------------|----|------|---------|----------------------------------------------------------------------------------------------------------------|
| Endocytosis                                            | 4  | 269  | 0.16951 | <i>ARFGAP1, FGFR3, PARD6A, VPS37B</i>                                                                          |
| RNA transport                                          | 3  | 178  | 0.17174 | <i>EIF3I, EEF1A2, PABPC5</i>                                                                                   |
| Phagosome                                              | 3  | 180  | 0.17561 | <i>NCF1, ATP6V0D1, ACTB</i>                                                                                    |
| Glycosaminoglycan degradation                          | 1  | 24   | 0.17947 | <i>IDUA</i>                                                                                                    |
| Human papillomavirus infection                         | 5  | 376  | 0.18308 | <i>PPP2R5E, ATP6V0D1, TRAF3, PARD6A, NOTCH3</i>                                                                |
| mRNA surveillance pathway                              | 2  | 99   | 0.1892  | <i>PPP2R5E, PABPC5</i>                                                                                         |
| Small cell lung cancer                                 | 2  | 100  | 0.19205 | <i>BIRC7, TRAF3</i>                                                                                            |
| Glycosylphosphatidylinositol (GPI)-anchor biosynthesis | 1  | 26   | 0.19236 | <i>PIGG</i>                                                                                                    |
| Phosphatidylinositol signaling system                  | 2  | 101  | 0.1949  | <i>PLCD4, PI4K2B</i>                                                                                           |
| Melanogenesis                                          | 2  | 103  | 0.20062 | <i>KITLG, ASIP</i>                                                                                             |
| NF-kappa B signaling pathway                           | 2  | 104  | 0.20348 | <i>TRAF3, LCK</i>                                                                                              |
| Th1 and Th2 cell differentiation                       | 2  | 104  | 0.20348 | <i>LCK, NOTCH3</i>                                                                                             |
| Collecting duct acid secretion                         | 1  | 28   | 0.20505 | <i>ATP6V0D1</i>                                                                                                |
| Phototransduction                                      | 1  | 28   | 0.20505 | <i>PDE6B</i>                                                                                                   |
| Cholinergic synapse                                    | 2  | 111  | 0.22367 | <i>CHRNA4, KCNQ2</i>                                                                                           |
| Focal adhesion                                         | 3  | 208  | 0.23211 | <i>ACTB, KDR, FLT1</i>                                                                                         |
| Base excision repair                                   | 1  | 33   | 0.23591 | <i>NEIL1</i>                                                                                                   |
| Tuberculosis                                           | 3  | 212  | 0.24045 | <i>IL18, ATP6V0D1, NFYA</i>                                                                                    |
| Leukocyte transendothelial migration                   | 2  | 117  | 0.24109 | <i>NCF1, ACTB</i>                                                                                              |
| Primary immunodeficiency                               | 1  | 34   | 0.24193 | <i>LCK</i>                                                                                                     |
| RIG-I-like receptor signaling pathway                  | 2  | 118  | 0.244   | <i>MAVS, TRAF3</i>                                                                                             |
| Metabolic pathways                                     | 15 | 1540 | 0.24531 | <i>PANK2, SMOX, UCKL1, PLCD4, PDE6B, MBOAT2, GGT6, GMDS, PI4K2B, GCAT, PDXP, HAO1, ATP6V0D1, HSD11B2, IDUA</i> |

|                                                          |   |     |         |                          |
|----------------------------------------------------------|---|-----|---------|--------------------------|
| Glyoxylate and dicarboxylate metabolism                  | 1 | 35  | 0.24791 | <i>HAO1</i>              |
| SNARE interactions in vesicular transport                | 1 | 35  | 0.24791 | <i>BET1L</i>             |
| Fructose and mannose metabolism                          | 1 | 35  | 0.24791 | <i>GMD5</i>              |
| Th17 cell differentiation                                | 2 | 120 | 0.24982 | <i>LCK, IRF4</i>         |
| AMPK signaling pathway                                   | 2 | 125 | 0.2644  | <i>CAMKK2, PPP2R5E</i>   |
| beta-Alanine metabolism                                  | 1 | 38  | 0.26557 | <i>SMOX</i>              |
| Apoptosis - multiple species                             | 1 | 38  | 0.26557 | <i>BIRC7</i>             |
| Aldosterone-regulated sodium reabsorption                | 1 | 38  | 0.26557 | <i>HSD11B2</i>           |
| African trypanosomiasis                                  | 1 | 39  | 0.27136 | <i>IL18</i>              |
| Bladder cancer                                           | 1 | 40  | 0.27711 | <i>FGFR3</i>             |
| Nicotine addiction                                       | 1 | 41  | 0.28282 | <i>CHRNA4</i>            |
| Vascular smooth muscle contraction                       | 2 | 134 | 0.29063 | <i>EDN3, ADRA1D</i>      |
| Homologous recombination                                 | 1 | 43  | 0.29409 | <i>BRIP1</i>             |
| cAMP signaling pathway                                   | 3 | 242 | 0.30421 | <i>GLI3, EDN3, HCAR1</i> |
| Proteasome                                               | 1 | 45  | 0.30518 | <i>PSMD13</i>            |
| Signaling pathways regulating pluripotency of stem cells | 2 | 143 | 0.31674 | <i>PCGF3, FGFR3</i>      |
| Glycine, serine and threonine metabolism                 | 1 | 48  | 0.3215  | <i>GCAT</i>              |
| Arginine and proline metabolism                          | 1 | 48  | 0.3215  | <i>SMOX</i>              |
| Basal transcription factors                              | 1 | 48  | 0.3215  | <i>GTF2I</i>             |
| Hedgehog signaling pathway                               | 1 | 49  | 0.32686 | <i>GLI3</i>              |
| Phospholipase D signaling pathway                        | 2 | 148 | 0.33116 | <i>PTGFR, KITLG</i>      |
| Ubiquitin mediated proteolysis                           | 2 | 149 | 0.33403 | <i>BIRC7, ANAPC4</i>     |
| Notch signaling pathway                                  | 1 | 51  | 0.33744 | <i>NOTCH3</i>            |
| Oxidative phosphorylation                                | 2 | 151 | 0.33977 | <i>ATP6V0D1, PPA2</i>    |
| Fanconi anemia pathway                                   | 1 | 52  | 0.34267 | <i>BRIP1</i>             |

|                                             |   |     |         |                        |
|---------------------------------------------|---|-----|---------|------------------------|
| Oxytocin signaling pathway                  | 2 | 154 | 0.34835 | <i>CAMKK2, ACTB</i>    |
| Adrenergic signaling in cardiomyocytes      | 2 | 154 | 0.34835 | <i>PPP2R5E, ADRA1D</i> |
| Spliceosome                                 | 2 | 155 | 0.3512  | <i>PPIL1, PRPF6</i>    |
| Breast cancer                               | 2 | 155 | 0.3512  | <i>FGF9, NOTCH3</i>    |
| Amino sugar and nucleotide sugar metabolism | 1 | 54  | 0.35301 | <i>GMDS</i>            |
| Hippo signaling pathway                     | 2 | 158 | 0.35973 | <i>ACTB, PARD6A</i>    |
| Malaria                                     | 1 | 56  | 0.36318 | <i>IL18</i>            |
| mTOR signaling pathway                      | 2 | 160 | 0.36539 | <i>CLIP1, LAMTOR3</i>  |
| Pyrimidine metabolism                       | 1 | 57  | 0.36821 | <i>UCKL1</i>           |
| Long-term depression                        | 1 | 58  | 0.3732  | <i>GRID2</i>           |
| VEGF signaling pathway                      | 1 | 60  | 0.38306 | <i>KDR</i>             |
| Measles                                     | 2 | 168 | 0.38784 | <i>MAVS, TRAF3</i>     |
| cGMP-PKG signaling pathway                  | 2 | 171 | 0.39617 | <i>GTF2I, ADRA1D</i>   |
| Glycerolipid metabolism                     | 1 | 63  | 0.39755 | <i>MBOAT2</i>          |
| Glutathione metabolism                      | 1 | 64  | 0.40231 | <i>GGT6</i>            |
| Basal cell carcinoma                        | 1 | 66  | 0.41171 | <i>GLI3</i>            |
| Hepatitis C                                 | 2 | 178 | 0.41539 | <i>MAVS, TRAF3</i>     |
| Tight junction                              | 2 | 181 | 0.42354 | <i>ACTB, PARD6A</i>    |
| Steroid hormone biosynthesis                | 1 | 69  | 0.42554 | <i>HSD11B2</i>         |
| Hepatitis B                                 | 2 | 183 | 0.42894 | <i>MAVS, TRAF3</i>     |
| Renin secretion                             | 1 | 71  | 0.43458 | <i>EDN3</i>            |
| Melanoma                                    | 1 | 72  | 0.43905 | <i>FGF9</i>            |
| Adherens junction                           | 1 | 72  | 0.43905 | <i>ACTB</i>            |
| Transcriptional misregulation in cancer     | 2 | 189 | 0.44498 | <i>SIN3A, FLT1</i>     |
| Retinol metabolism                          | 1 | 74  | 0.44787 | <i>SDR16C5</i>         |
| Inflammatory bowel disease (IBD)            | 1 | 75  | 0.45224 | <i>IL18</i>            |

|                                                               |   |     |         |                                    |
|---------------------------------------------------------------|---|-----|---------|------------------------------------|
| ABC transporters                                              | 1 | 76  | 0.45656 | <i>ABCB9</i>                       |
| Arrhythmogenic right ventricular cardiomyopathy (ARVC)        | 1 | 76  | 0.45656 | <i>ACTB</i>                        |
| Leishmaniasis                                                 | 1 | 77  | 0.46086 | <i>NCF1</i>                        |
| Bacterial invasion of epithelial cells                        | 1 | 77  | 0.46086 | <i>ACTB</i>                        |
| B cell receptor signaling pathway                             | 1 | 78  | 0.46512 | <i>DAPP1</i>                       |
| MicroRNAs in cancer                                           | 2 | 198 | 0.46856 | <i>FGFR3, NOTCH3</i>               |
| Viral myocarditis                                             | 1 | 81  | 0.47769 | <i>ACTB</i>                        |
| RNA degradation                                               | 1 | 83  | 0.48592 | <i>PABPC5</i>                      |
| Herpes simplex virus 1 infection                              | 4 | 457 | 0.49315 | <i>ZNF777, MAVS, TRAF3, ZNF746</i> |
| Peroxisome                                                    | 1 | 85  | 0.49401 | <i>HAO1</i>                        |
| Huntington disease                                            | 2 | 212 | 0.50403 | <i>RCOR1, SIN3A</i>                |
| Proteoglycans in cancer                                       | 2 | 215 | 0.51143 | <i>ACTB, KDR</i>                   |
| Longevity regulating pathway                                  | 1 | 90  | 0.51369 | <i>CAMKK2</i>                      |
| Drug metabolism - other enzymes                               | 1 | 90  | 0.51369 | <i>UCKL1</i>                       |
| Alcoholism                                                    | 2 | 219 | 0.52119 | <i>CAMKK2, H2AFZ</i>               |
| Hypertrophic cardiomyopathy (HCM)                             | 1 | 92  | 0.52135 | <i>ACTB</i>                        |
| PD-L1 expression and PD-1 checkpoint pathway in cancer        | 1 | 92  | 0.52135 | <i>LCK</i>                         |
| IL-17 signaling pathway                                       | 1 | 92  | 0.52135 | <i>TRAF3</i>                       |
| Viral protein interaction with cytokine and cytokine receptor | 1 | 94  | 0.52889 | <i>IL18</i>                        |
| Fc gamma R-mediated phagocytosis                              | 1 | 94  | 0.52889 | <i>NCF1</i>                        |
| Dilated cardiomyopathy (DCM)                                  | 1 | 95  | 0.53261 | <i>ACTB</i>                        |
| Antigen processing and presentation                           | 1 | 96  | 0.53631 | <i>NFYA</i>                        |
| Endocrine resistance                                          | 1 | 96  | 0.53631 | <i>NOTCH3</i>                      |

|                                                      |   |     |         |                        |
|------------------------------------------------------|---|-----|---------|------------------------|
| Salivary secretion                                   | 1 | 100 | 0.5508  | <i>ADRA1D</i>          |
| Glycerophospholipid metabolism                       | 1 | 102 | 0.55787 | <i>MBOAT2</i>          |
| Viral carcinogenesis                                 | 2 | 244 | 0.57916 | <i>ATP6V0D1, TRAF3</i> |
| Human T-cell leukemia virus 1 infection              | 2 | 246 | 0.58357 | <i>LCK, ANAPC4</i>     |
| AGE-RAGE signaling pathway in diabetic complications | 1 | 111 | 0.58837 | <i>PLCD4</i>           |
| T cell receptor signaling pathway                    | 1 | 112 | 0.59162 | <i>LCK</i>             |
| HIF-1 signaling pathway                              | 1 | 113 | 0.59486 | <i>FLT1</i>            |
| Hematopoietic cell lineage                           | 1 | 117 | 0.60753 | <i>KITLG</i>           |
| Ribosome                                             | 2 | 258 | 0.60931 | <i>MRPS6, RPS20</i>    |
| Toll-like receptor signaling pathway                 | 1 | 119 | 0.61371 | <i>TRAF3</i>           |
| Sphingolipid signaling pathway                       | 1 | 126 | 0.63461 | <i>PPP2R5E</i>         |
| Toxoplasmosis                                        | 1 | 127 | 0.6375  | <i>BIRC7</i>           |
| Platelet activation                                  | 1 | 127 | 0.6375  | <i>ACTB</i>            |
| Carbon metabolism                                    | 1 | 127 | 0.6375  | <i>HAO1</i>            |
| TNF signaling pathway                                | 1 | 128 | 0.64037 | <i>TRAF3</i>           |
| Cell cycle                                           | 1 | 129 | 0.64322 | <i>ANAPC4</i>          |
| Dopaminergic synapse                                 | 1 | 132 | 0.65162 | <i>PPP2R5E</i>         |
| Autophagy - animal                                   | 1 | 133 | 0.65438 | <i>CAMKK2</i>          |
| Apelin signaling pathway                             | 1 | 138 | 0.66785 | <i>NOTCH3</i>          |
| Purine metabolism                                    | 1 | 141 | 0.67568 | <i>PDE6B</i>           |
| Natural killer cell mediated cytotoxicity            | 1 | 147 | 0.69079 | <i>LCK</i>             |
| Apoptosis                                            | 1 | 154 | 0.70753 | <i>ACTB</i>            |
| Gastric cancer                                       | 1 | 163 | 0.72774 | <i>FGF9</i>            |
| Protein processing in endoplasmic reticulum          | 1 | 172 | 0.74656 | <i>DNAJC5</i>          |
| Systemic lupus erythematosus                         | 1 | 175 | 0.75254 | <i>H2AFZ</i>           |

|                                                 |   |     |         |                       |
|-------------------------------------------------|---|-----|---------|-----------------------|
| Hepatocellular carcinoma                        | 1 | 184 | 0.76966 | <i>ACTB</i>           |
| Chemokine signaling pathway                     | 1 | 188 | 0.77688 | <i>NCF1</i>           |
| Cytokine-cytokine receptor interaction          | 2 | 358 | 0.77823 | <i>IL18, TNFRSF6B</i> |
| Necroptosis                                     | 1 | 190 | 0.78041 | <i>H2AFZ</i>          |
| Axon guidance                                   | 1 | 191 | 0.78215 | <i>PARD6A</i>         |
| Kaposi sarcoma-associated herpesvirus infection | 1 | 217 | 0.82292 | <i>TRAF3</i>          |
| Thermogenesis                                   | 1 | 251 | 0.86499 | <i>ACTB</i>           |

**Supplementary Table S12** KEGG enrichment analysis of candidate genes during breeding.

| Term                                    | Input number | Background number | <i>P</i> -value | Input                                                                            |
|-----------------------------------------|--------------|-------------------|-----------------|----------------------------------------------------------------------------------|
| Melanoma                                | 5            | 72                | 0.00041         | <i>MITF, CDH1, PDGFB, FGF18, FGF9</i>                                            |
| Pathways in cancer                      | 12           | 551               | 0.00226         | <i>PDGFB, GNAQ, CDH1, BIRC7, BID, DLL1, IL5, FGF9, MITF, FGF18, TXNRD2, HHIP</i> |
| Neuroactive ligand-receptor interaction | 9            | 372               | 0.00406         | <i>GRID2, P2RY14, GABRG2, P2RY13, CHRNA4, NPBWR2, EDN3, GABRA1, OPRL1</i>        |
| Nicotine addiction                      | 3            | 41                | 0.00544         | <i>CHRNA4, GABRG2, GABRA1</i>                                                    |
| Notch signaling pathway                 | 3            | 51                | 0.0096          | <i>DLL1, KAT2B, NCSTN</i>                                                        |
| Thyroid hormone signaling pathway       | 4            | 121               | 0.01897         | <i>RCAN1, MED13L, KAT2B, MED12L</i>                                              |
| Legionellosis                           | 3            | 68                | 0.02001         | <i>EEF1A2, SAR1B, BCL2L13</i>                                                    |
| TNF signaling pathway                   | 4            | 128               | 0.02265         | <i>RIPK1, IRF1, BCL3, TNFAIP3</i>                                                |
| Endocytosis                             | 6            | 269               | 0.02499         | <i>CBLC, CAPZA1, RAB5A, CHMP4B, ARRB2, ARFGAP1</i>                               |
| Starch and sucrose metabolism           | 2            | 33                | 0.03261         | <i>GANC, GYG1</i>                                                                |
| Rap1 signaling pathway                  | 5            | 215               | 0.03384         | <i>CDH1, PDGFB, FGF18, GNAQ, FGF9</i>                                            |
| Ubiquitin mediated proteolysis          | 4            | 149               | 0.03616         | <i>CBLC, BIRC7, ANAPC5, UBE2D3</i>                                               |
| Gap junction                            | 3            | 91                | 0.04105         | <i>PDGFB, TUBA8, GNAQ</i>                                                        |
| Apoptosis - multiple species            | 2            | 38                | 0.04165         | <i>BIRC7, BID</i>                                                                |



|                                          |   |     |         |                                              |
|------------------------------------------|---|-----|---------|----------------------------------------------|
| IL-17 signaling pathway                  | 3 | 92  | 0.04215 | <i>IL5, ANAPC5, TNFAIP3</i>                  |
| Morphine addiction                       | 3 | 94  | 0.04438 | <i>ARRB2, GABRA1, GABRG2</i>                 |
| Amoebiasis                               | 3 | 96  | 0.04667 | <i>GNAI4, RAB5A, GNAQ</i>                    |
| Homologous recombination                 | 2 | 43  | 0.0515  | <i>POLD4, RAD50</i>                          |
| Melanogenesis                            | 3 | 103 | 0.05513 | <i>MITF, GNAQ, ASIP</i>                      |
| Human immunodeficiency virus 1 infection | 5 | 249 | 0.05634 | <i>RIPK1, BID, APOBEC3F, GNAQ, APOBEC3Z1</i> |
| Hedgehog signaling pathway               | 2 | 49  | 0.06428 | <i>ARRB2, HHIP</i>                           |
| Cholinergic synapse                      | 3 | 111 | 0.06563 | <i>CHRNA4, KCNQ2, GNAQ</i>                   |
| Antifolate resistance                    | 2 | 52  | 0.07104 | <i>ABCG2, ALOX12</i>                         |
| Necroptosis                              | 4 | 190 | 0.07343 | <i>RIPK1, BID, CHMP4B, TNFAIP3</i>           |
| Amyotrophic lateral sclerosis (ALS)      | 2 | 56  | 0.08037 | <i>BID, RAB5A</i>                            |
| Long-term depression                     | 2 | 58  | 0.08518 | <i>GNAQ, GRID2</i>                           |
| Platelet activation                      | 3 | 127 | 0.0891  | <i>GNAQ, P2RY12, SNAP23</i>                  |
| Non-homologous end-joining               | 1 | 13  | 0.10764 | <i>RAD50</i>                                 |
| Mitophagy - animal                       | 2 | 67  | 0.10779 | <i>MITF, BCL2L13</i>                         |
| Regulation of actin cytoskeleton         | 4 | 219 | 0.10812 | <i>PDGFB, FGF18, SSH3, FGF9</i>              |
| MAPK signaling pathway                   | 5 | 305 | 0.1083  | <i>PDGFB, FGF18, ARRB2, FGF9, MAPK8IP3</i>   |
| Renin secretion                          | 2 | 71  | 0.1183  | <i>EDN3, GNAQ</i>                            |
| Gastric acid secretion                   | 2 | 75  | 0.12906 | <i>KCNE2, GNAQ</i>                           |
| Retrograde endocannabinoid signaling     | 3 | 152 | 0.13158 | <i>GABRG2, GABRA1, GNAQ</i>                  |
| Apoptosis                                | 3 | 154 | 0.13524 | <i>RIPK1, BID, TUBA8</i>                     |
| Spliceosome                              | 3 | 155 | 0.13709 | <i>PRPF6, MAGOH, DDX46</i>                   |
| Breast cancer                            | 3 | 155 | 0.13709 | <i>DLL1, FGF18, FGF9</i>                     |
| Ras signaling pathway                    | 4 | 242 | 0.13995 | <i>PDGFB, FGF18, RAB5A, FGF9</i>             |
| Synaptic vesicle cycle                   | 2 | 80  | 0.1428  | <i>CPLX1, ATP6V1E1</i>                       |
| Gastric cancer                           | 3 | 163 | 0.15215 | <i>CDH1, FGF18, FGF9</i>                     |

|                                                            |   |     |         |                                             |
|------------------------------------------------------------|---|-----|---------|---------------------------------------------|
| Peroxisome                                                 | 2 | 85  | 0.15684 | <i>PXMP4, PEX26</i>                         |
| Selenocompound metabolism                                  | 1 | 20  | 0.15705 | <i>TXNRD2</i>                               |
| Human cytomegalovirus infection                            | 4 | 255 | 0.15941 | <i>RIPK1, BID, IL10RA, GNAQ</i>             |
| Measles                                                    | 3 | 168 | 0.16182 | <i>EIF3H, BID, TNFAIP3</i>                  |
| GABAergic synapse                                          | 2 | 87  | 0.16252 | <i>GABRG2, GABRA1</i>                       |
| Protein processing in endoplasmic reticulum                | 3 | 172 | 0.16968 | <i>SAR1B, SEC24A, UBE2D3</i>                |
| Other glycan degradation                                   | 1 | 22  | 0.17066 | <i>MANBA</i>                                |
| Cytokine-cytokine receptor interaction                     | 5 | 358 | 0.17287 | <i>CXCL16, CLCF1, IL5, IL10RA, TNFRSF6B</i> |
| Mismatch repair                                            | 1 | 23  | 0.17739 | <i>POLD4</i>                                |
| RNA transport                                              | 3 | 178 | 0.18168 | <i>EIF3H, EEF1A2, MAGOH</i>                 |
| Vitamin digestion and absorption                           | 1 | 24  | 0.18406 | <i>SLC52A3</i>                              |
| Phagosome                                                  | 3 | 180 | 0.18573 | <i>ATP6V1E1, TUBA8, RAB5A</i>               |
| Renin-angiotensin system                                   | 1 | 26  | 0.19723 | <i>PREP</i>                                 |
| Glycosylphosphatidylinositol (GPI)-anchor biosynthesis     | 1 | 26  | 0.19723 | <i>PIGG</i>                                 |
| mRNA surveillance pathway                                  | 2 | 99  | 0.19732 | <i>SMG6, MAGOH</i>                          |
| Alzheimer disease                                          | 3 | 187 | 0.20009 | <i>BID, GNAQ, NCSTN</i>                     |
| Collecting duct acid secretion                             | 1 | 28  | 0.2102  | <i>ATP6V1E1</i>                             |
| Phototransduction                                          | 1 | 28  | 0.2102  | <i>PDE6B</i>                                |
| NF-kappa B signaling pathway                               | 2 | 104 | 0.21208 | <i>RIPK1, TNFAIP3</i>                       |
| Th1 and Th2 cell differentiation                           | 2 | 104 | 0.21208 | <i>DLL1, IL5</i>                            |
| Glycosphingolipid biosynthesis - lacto and neolacto series | 1 | 29  | 0.2166  | <i>ST3GAL6</i>                              |
| RNA polymerase                                             | 1 | 29  | 0.2166  | <i>TWISTNB</i>                              |
| Inflammatory mediator regulation of TRP channels           | 2 | 106 | 0.21801 | <i>GNAQ, ALOX12</i>                         |

|                                                     |   |     |         |                           |
|-----------------------------------------------------|---|-----|---------|---------------------------|
| Parathyroid hormone synthesis, secretion and action | 2 | 106 | 0.21801 | <i>ARRB2, GNAQ</i>        |
| Pentose phosphate pathway                           | 1 | 32  | 0.23551 | <i>H6PD</i>               |
| Galactose metabolism                                | 1 | 32  | 0.23551 | <i>GANC</i>               |
| C-type lectin receptor signaling pathway            | 2 | 112 | 0.2359  | <i>IRF1, BCL3</i>         |
| Serotonergic synapse                                | 2 | 113 | 0.23888 | <i>GNAQ, ALOX12</i>       |
| Base excision repair                                | 1 | 33  | 0.24171 | <i>POLD4</i>              |
| Tuberculosis                                        | 3 | 212 | 0.25318 | <i>BID, RAB5A, IL10RA</i> |
| Chagas disease (American trypanosomiasis)           | 2 | 118 | 0.25386 | <i>GNAI4, GNAQ</i>        |
| Asthma                                              | 1 | 35  | 0.25396 | <i>IL5</i>                |
| SNARE interactions in vesicular transport           | 1 | 35  | 0.25396 | <i>SNAP23</i>             |
| Fructose and mannose metabolism                     | 1 | 35  | 0.25396 | <i>GMDS</i>               |
| DNA replication                                     | 1 | 36  | 0.26001 | <i>POLD4</i>              |
| Kaposi sarcoma-associated herpesvirus infection     | 3 | 217 | 0.26406 | <i>RCAN1, BID, PDGFB</i>  |
| Lysosome                                            | 2 | 126 | 0.27784 | <i>GGAI, MANBA</i>        |
| Sphingolipid signaling pathway                      | 2 | 126 | 0.27784 | <i>BID, GNAQ</i>          |
| African trypanosomiasis                             | 1 | 39  | 0.27787 | <i>GNAQ</i>               |
| Toxoplasmosis                                       | 2 | 127 | 0.28084 | <i>BIRC7, IL10RA</i>      |
| Bladder cancer                                      | 1 | 40  | 0.28373 | <i>CDH1</i>               |
| Thyroid cancer                                      | 1 | 41  | 0.28954 | <i>CDH1</i>               |
| Pyruvate metabolism                                 | 1 | 41  | 0.28954 | <i>HAGH</i>               |
| Tyrosine metabolism                                 | 1 | 43  | 0.30102 | <i>FAHD1</i>              |
| Jak-STAT signaling pathway                          | 3 | 234 | 0.30138 | <i>PDGFB, IL5, IL10RA</i> |
| Vascular smooth muscle contraction                  | 2 | 134 | 0.30178 | <i>EDN3, GNAQ</i>         |
| Apelin signaling pathway                            | 2 | 138 | 0.3137  | <i>CDH1, GNAQ</i>         |

|                                                           |   |     |         |                              |
|-----------------------------------------------------------|---|-----|---------|------------------------------|
| Nucleotide excision repair                                | 1 | 46  | 0.31789 | <i>POLD4</i>                 |
| Vasopressin-regulated water reabsorption                  | 1 | 47  | 0.32343 | <i>RAB5A</i>                 |
| Epstein-Barr virus infection                              | 3 | 245 | 0.32569 | <i>RIPK1, BID, TNFAIP3</i>   |
| Human T-cell leukemia virus 1 infection                   | 3 | 246 | 0.32791 | <i>ANAPC5, RANBP1, KAT2B</i> |
| Signaling pathways regulating pluripotency of stem cells  | 2 | 143 | 0.32854 | <i>PCGF3, JARID2</i>         |
| Arginine and proline metabolism                           | 1 | 48  | 0.32892 | <i>LAP3</i>                  |
| Endocrine and other factor-regulated calcium reabsorption | 1 | 48  | 0.32892 | <i>GNAQ</i>                  |
| Porphyrin and chlorophyll metabolism                      | 1 | 48  | 0.32892 | <i>CPOX</i>                  |
| Fanconi anemia pathway                                    | 1 | 52  | 0.35044 | <i>EME2</i>                  |
| Oxytocin signaling pathway                                | 2 | 154 | 0.36086 | <i>RCAN1, GNAQ</i>           |
| Adrenergic signaling in cardiomyocytes                    | 2 | 154 | 0.36086 | <i>KCNE1, GNAQ</i>           |
| Amino sugar and nucleotide sugar metabolism               | 1 | 54  | 0.36094 | <i>GMDS</i>                  |
| Intestinal immune network for IgA production              | 1 | 55  | 0.36612 | <i>IL5</i>                   |
| Endometrial cancer                                        | 1 | 59  | 0.38646 | <i>CDH1</i>                  |
| Allograft rejection                                       | 1 | 60  | 0.39144 | <i>IL5</i>                   |
| Cellular senescence                                       | 2 | 169 | 0.40396 | <i>RAD9A, RAD50</i>          |
| Glutathione metabolism                                    | 1 | 64  | 0.41096 | <i>LAP3</i>                  |
| Basal cell carcinoma                                      | 1 | 66  | 0.42049 | <i>HHIP</i>                  |
| Fc epsilon RI signaling pathway                           | 1 | 67  | 0.42519 | <i>IL5</i>                   |
| Hepatitis C                                               | 2 | 178 | 0.42915 | <i>RIPK1, BID</i>            |
| Cortisol synthesis and secretion                          | 1 | 68  | 0.42986 | <i>GNAQ</i>                  |
| Long-term potentiation                                    | 1 | 69  | 0.43449 | <i>GNAQ</i>                  |

|                                           |   |     |         |                       |
|-------------------------------------------|---|-----|---------|-----------------------|
| Tight junction                            | 2 | 181 | 0.43743 | <i>BVES, TUBA8</i>    |
| Adherens junction                         | 1 | 72  | 0.44816 | <i>CDH1</i>           |
| Thyroid hormone synthesis                 | 1 | 73  | 0.45264 | <i>GNAQ</i>           |
| Renal cell carcinoma                      | 1 | 73  | 0.45264 | <i>PDGFB</i>          |
| NOD-like receptor signaling pathway       | 2 | 187 | 0.45378 | <i>RIPK1, TNFAIP3</i> |
| Chemokine signaling pathway               | 2 | 188 | 0.45648 | <i>ARRB2, CXCL16</i>  |
| Cytosolic DNA-sensing pathway             | 1 | 74  | 0.45708 | <i>RIPK1</i>          |
| Arachidonic acid metabolism               | 1 | 75  | 0.46149 | <i>ALOX12</i>         |
| Inflammatory bowel disease (IBD)          | 1 | 75  | 0.46149 | <i>IL5</i>            |
| Glioma                                    | 1 | 76  | 0.46587 | <i>PDGFB</i>          |
| ABC transporters                          | 1 | 76  | 0.46587 | <i>ABCG2</i>          |
| Autoimmune thyroid disease                | 1 | 76  | 0.46587 | <i>IL5</i>            |
| Bacterial invasion of epithelial cells    | 1 | 77  | 0.47021 | <i>CDH1</i>           |
| Taste transduction                        | 1 | 78  | 0.47451 | <i>GABRA1</i>         |
| Influenza A                               | 2 | 198 | 0.48303 | <i>BID, TMPRSS4</i>   |
| Viral myocarditis                         | 1 | 81  | 0.48721 | <i>BID</i>            |
| Pertussis                                 | 1 | 82  | 0.49138 | <i>IRF1</i>           |
| EGFR tyrosine kinase inhibitor resistance | 1 | 83  | 0.49551 | <i>PDGFB</i>          |
| p53 signaling pathway                     | 1 | 83  | 0.49551 | <i>BID</i>            |
| Calcium signaling pathway                 | 2 | 203 | 0.49601 | <i>GNAI4, GNAQ</i>    |
| Insulin secretion                         | 1 | 86  | 0.50771 | <i>GNAQ</i>           |
| Platinum drug resistance                  | 1 | 88  | 0.51568 | <i>BID</i>            |
| Ribosome biogenesis in eukaryotes         | 1 | 90  | 0.52352 | <i>UTP4</i>           |
| Prolactin signaling pathway               | 1 | 90  | 0.52352 | <i>IRF1</i>           |
| Progesterone-mediated oocyte maturation   | 1 | 91  | 0.52739 | <i>ANAPC5</i>         |
| GnRH signaling pathway                    | 1 | 93  | 0.53504 | <i>GNAQ</i>           |

|                                                               |    |      |         |                                                                                          |
|---------------------------------------------------------------|----|------|---------|------------------------------------------------------------------------------------------|
| Viral protein interaction with cytokine and cytokine receptor | 1  | 94   | 0.53882 | <i>IL10RA</i>                                                                            |
| Endocrine resistance                                          | 1  | 96   | 0.54629 | <i>DLL1</i>                                                                              |
| Circadian entrainment                                         | 1  | 96   | 0.54629 | <i>GNAQ</i>                                                                              |
| Prostate cancer                                               | 1  | 97   | 0.54998 | <i>PDGFB</i>                                                                             |
| Aldosterone synthesis and secretion                           | 1  | 99   | 0.55727 | <i>GNAQ</i>                                                                              |
| Salivary secretion                                            | 1  | 100  | 0.56086 | <i>GNAQ</i>                                                                              |
| Small cell lung cancer                                        | 1  | 100  | 0.56086 | <i>BIRC7</i>                                                                             |
| Bile secretion                                                | 1  | 100  | 0.56086 | <i>ABCG2</i>                                                                             |
| Choline metabolism in cancer                                  | 1  | 101  | 0.56443 | <i>PDGFB</i>                                                                             |
| Rheumatoid arthritis                                          | 1  | 101  | 0.56443 | <i>ATP6V1E1</i>                                                                          |
| Pancreatic secretion                                          | 1  | 105  | 0.57843 | <i>GNAQ</i>                                                                              |
| Glucagon signaling pathway                                    | 1  | 108  | 0.58863 | <i>GNAQ</i>                                                                              |
| cAMP signaling pathway                                        | 2  | 242  | 0.58986 | <i>EDN3, HHIP</i>                                                                        |
| Glutamatergic synapse                                         | 1  | 109  | 0.59198 | <i>GNAQ</i>                                                                              |
| Viral carcinogenesis                                          | 2  | 244  | 0.5943  | <i>RANBP1, KAT2B</i>                                                                     |
| T cell receptor signaling pathway                             | 1  | 112  | 0.60185 | <i>IL5</i>                                                                               |
| Metabolic pathways                                            | 12 | 1540 | 0.60766 | <i>PDE6B, ST3GAL6, GANC, HAGH, LAP3, ATP6V1E1, H6PD, CPOX, FAHD1, GMDS, ALOX12, GYG1</i> |
| Hematopoietic cell lineage                                    | 1  | 117  | 0.61778 | <i>IL5</i>                                                                               |
| RIG-I-like receptor signaling pathway                         | 1  | 118  | 0.62089 | <i>RIPK1</i>                                                                             |
| Toll-like receptor signaling pathway                          | 1  | 119  | 0.62398 | <i>RIPK1</i>                                                                             |
| Ribosome                                                      | 2  | 258  | 0.62444 | <i>MRPS6, RPL5</i>                                                                       |
| Oocyte meiosis                                                | 1  | 121  | 0.63007 | <i>ANAPC5</i>                                                                            |
| PI3K-Akt signaling pathway                                    | 3  | 398  | 0.63299 | <i>PDGFB, FGF18, FGF9</i>                                                                |
| Carbon metabolism                                             | 1  | 127  | 0.64777 | <i>H6PD</i>                                                                              |

|                                           |   |      |         |                       |
|-------------------------------------------|---|------|---------|-----------------------|
| Cell cycle                                | 1 | 129  | 0.65348 | <i>ANAPC5</i>         |
| Dopaminergic synapse                      | 1 | 132  | 0.66187 | <i>GNAQ</i>           |
| Osteoclast differentiation                | 1 | 134  | 0.66736 | <i>MITF</i>           |
| Relaxin signaling pathway                 | 1 | 135  | 0.67006 | <i>ARRB2</i>          |
| Estrogen signaling pathway                | 1 | 138  | 0.67806 | <i>GNAQ</i>           |
| Purine metabolism                         | 1 | 141  | 0.68586 | <i>PDE6B</i>          |
| Natural killer cell mediated cytotoxicity | 1 | 147  | 0.7009  | <i>BID</i>            |
| Phospholipase D signaling pathway         | 1 | 148  | 0.70333 | <i>PDGFB</i>          |
| Fluid shear stress and atherosclerosis    | 1 | 149  | 0.70575 | <i>PDGFB</i>          |
| Oxidative phosphorylation                 | 1 | 151  | 0.71052 | <i>ATP6V1E1</i>       |
| Hippo signaling pathway                   | 1 | 158  | 0.72663 | <i>CDH1</i>           |
| mTOR signaling pathway                    | 1 | 160  | 0.73107 | <i>ATP6V1E1</i>       |
| Cushing syndrome                          | 1 | 161  | 0.73326 | <i>GNAQ</i>           |
| Non-alcoholic fatty liver disease (NAFLD) | 1 | 164  | 0.73973 | <i>BID</i>            |
| cGMP-PKG signaling pathway                | 1 | 171  | 0.75422 | <i>GNAQ</i>           |
| Cell adhesion molecules (CAMs)            | 1 | 173  | 0.75821 | <i>CDH1</i>           |
| Hepatitis B                               | 1 | 183  | 0.77722 | <i>BID</i>            |
| Hepatocellular carcinoma                  | 1 | 184  | 0.77904 | <i>TXNRD2</i>         |
| Transcriptional misregulation in cancer   | 1 | 189  | 0.7879  | <i>MITF</i>           |
| Axon guidance                             | 1 | 191  | 0.79135 | <i>SSH3</i>           |
| MicroRNAs in cancer                       | 1 | 198  | 0.80298 | <i>PDGFB</i>          |
| Human papillomavirus infection            | 2 | 376  | 0.81317 | <i>IRF1, ATP6V1E1</i> |
| Focal adhesion                            | 1 | 208  | 0.81848 | <i>PDGFB</i>          |
| Huntington disease                        | 1 | 212  | 0.82434 | <i>GNAQ</i>           |
| Herpes simplex virus 1 infection          | 1 | 457  | 0.97665 | <i>BID</i>            |
| Olfactory transduction                    | 1 | 1127 | 0.99992 | <i>ARRB2</i>          |

---

**Supplementary Table S13** Overlapping regions during domestication and breeding.

| No. | Combined Region (Mb) | Chr | Position |           | Gene Name                                                                                            |
|-----|----------------------|-----|----------|-----------|------------------------------------------------------------------------------------------------------|
|     |                      |     | Start    | End       |                                                                                                      |
| 1   | Chr1: 27.75-27.9     | 1   | 27750001 | 27900000  | <i>GLIS1</i>                                                                                         |
| 2   | Chr6:116.4-116.55    | 6   | 1.16E+08 | 116550000 | <i>TMEM175, GAK, CPLX1</i>                                                                           |
|     |                      | 6   | 1.17E+08 | 116850000 | <i>PCGF3, MFSD7, ATP5I, PDE6B, LOC101108751, LOC105613214, PIGG</i>                                  |
| 3   | Chr6:116.7-117       | 6   | 1.17E+08 | 116925000 | <i>PDE6B, LOC101108751, LOC105613214, PIGG</i>                                                       |
|     |                      | 6   | 1.17E+08 | 117000000 | <i>PIGG</i>                                                                                          |
| 4   | Chr10:35.475-35.625  | 10  | 35475001 | 35625000  | <i>FGF9</i>                                                                                          |
|     |                      | 13  | 53175001 | 53325000  | <i>TPD52L2, ABHD16B, ZBTB46, ZGPAT, ARFRP1, TNFRSF6B, RTEL1, STMN3</i>                               |
| 5   | Chr13:53.175-53.55   | 13  | 53250001 | 53400000  | <i>ZBTB46, ZGPAT, ARFRP1, TNFRSF6B, RTEL1, STMN3, GMEB2, C13H20orf195, SRMS, PTK6, PPDPF, EEF1A2</i> |
|     |                      | 13  | 53325001 | 53475000  | <i>STMN3, GMEB2, C13H20orf195, SRMS, PTK6, PPDPF, EEF1A2, KCNQ2</i>                                  |
|     |                      | 13  | 53400001 | 53550000  | <i>EEF1A2, KCNQ2, CHRNA4, COL20A1, ARFGAP1, BIRC7</i>                                                |
| 6   | Chr13:56.25-56.4     | 13  | 56250001 | 56400000  | <i>EDN3, LOC105616728, ZNF831</i>                                                                    |
|     |                      | 20  | 49875001 | 50025000  | <i>GMDS</i>                                                                                          |
| 7   | Chr20:49.875-50.175  | 20  | 49950001 | 50100000  | <i>GMDS, LOC105603912</i>                                                                            |
|     |                      | 20  | 50025001 | 50175000  | <i>GMDS, LOC105603912</i>                                                                            |

**Supplementary Table S14** KEGG enrichment analysis of candidate genes from overlapping regions during domestication and breeding.

| Term                | Input number | Background number | P-value    | Input                |
|---------------------|--------------|-------------------|------------|----------------------|
| Cholinergic synapse | 2            | 111               | 0.00673673 | <i>CHRNA4, KCNQ2</i> |



|                                                    |   |     |            |                     |
|----------------------------------------------------|---|-----|------------|---------------------|
| Glycosylphosphatidylinositol (GPI)-anchor          |   |     |            |                     |
| biosynthesis                                       | 1 | 26  | 0.02903342 | <i>PIGG</i>         |
| Phototransduction                                  | 1 | 28  | 0.03115136 | <i>PDE6B</i>        |
| Fructose and mannose metabolism                    | 1 | 35  | 0.03852909 | <i>GMDS</i>         |
| Apoptosis - multiple species                       | 1 | 38  | 0.04167434 | <i>BIRC7</i>        |
| Nicotine addiction                                 | 1 | 41  | 0.04480965 | <i>CHRNA4</i>       |
| Amino sugar and nucleotide sugar metabolism        | 1 | 54  | 0.05828194 | <i>GMDS</i>         |
| Neuroactive ligand-receptor interaction            | 2 | 372 | 0.06238825 | <i>CHRNA4, EDN3</i> |
| Legionellosis                                      | 1 | 68  | 0.07258535 | <i>EEF1A2</i>       |
| Renin secretion                                    | 1 | 71  | 0.07562296 | <i>EDN3</i>         |
| Melanoma                                           | 1 | 72  | 0.07663336 | <i>FGF9</i>         |
| Synaptic vesicle cycle                             | 1 | 80  | 0.08467826 | <i>CPLX1</i>        |
| Small cell lung cancer                             | 1 | 100 | 0.10449556 | <i>BIRC7</i>        |
| Pathways in cancer                                 | 2 | 551 | 0.12135438 | <i>BIRC7, FGF9</i>  |
| Toxoplasmosis                                      | 1 | 127 | 0.13059285 | <i>BIRC7</i>        |
| Vascular smooth muscle contraction                 | 1 | 134 | 0.13723801 | <i>EDN3</i>         |
| Purine metabolism                                  | 1 | 141 | 0.14383412 | <i>PDE6B</i>        |
| Signaling pathways regulating pluripotency of stem |   |     |            |                     |
| cells                                              | 1 | 143 | 0.14570976 | <i>PCGF3</i>        |
| Ubiquitin mediated proteolysis                     | 1 | 149 | 0.15131291 | <i>BIRC7</i>        |
| Breast cancer                                      | 1 | 155 | 0.15688057 | <i>FGF9</i>         |
| Gastric cancer                                     | 1 | 163 | 0.16424928 | <i>FGF9</i>         |
| RNA transport                                      | 1 | 178 | 0.17789837 | <i>EEF1A2</i>       |
| Rap1 signaling pathway                             | 1 | 215 | 0.21065224 | <i>FGF9</i>         |
| Regulation of actin cytoskeleton                   | 1 | 219 | 0.21411677 | <i>FGF9</i>         |
| cAMP signaling pathway                             | 1 | 242 | 0.23375473 | <i>EDN3</i>         |

|                                        |   |      |            |                    |
|----------------------------------------|---|------|------------|--------------------|
| Ras signaling pathway                  | 1 | 242  | 0.23375473 | <i>FGF9</i>        |
| Endocytosis                            | 1 | 269  | 0.25620371 | <i>ARFGAP1</i>     |
| MAPK signaling pathway                 | 1 | 305  | 0.2851499  | <i>FGF9</i>        |
| Cytokine-cytokine receptor interaction | 1 | 358  | 0.3257945  | <i>TNFRSF6B</i>    |
| PI3K-Akt signaling pathway             | 1 | 398  | 0.35498277 | <i>FGF9</i>        |
| Metabolic pathways                     | 2 | 1540 | 0.50728578 | <i>PDE6B, GMDS</i> |

---
